# Supplementary material for: Somatic SETBP1 mutations in myeloid malignancies
Source: Springer Nature journal article supplement (doi:10.1038/ng.2696), 2013-07-07
Supplement: 41588_2013_BFng2696_MOESM30_ESM.pdf [file 41588_2013_BFng2696_MOESM30_ESM.pdf]

## Supplementary information

### **Somatic *SETBP1* mutations in myeloid malignancies**

Hideki Makishima, Kenichi Yoshida, Nhu Nguyen, Bartlomiej Przychodzen, Masashi Sanada, Yusuke Okuno, Kwok Peng Ng, Kristbjorn O Gudmundsson, Bandana A. Vishwakarma, Andres Jerez, Ines Gomez-Segui, Mariko Takahashi, Yuichi Shiraishi, Yasunobu Nagata, Kathryn Guinta, Hiraku Mori, Mikkael A Sekeres, Kenichi Chiba, Hiroko Tanaka, Hideki Muramatsu, Hirotohi Sakaguchi, Ronald L Paquette, Michael A McDevitt, Seiji Kojima, Yogen Sauntharajah, Satoru Miyano, Lee-Yung Shih, Yang Du\*, Seishi Ogawa\* and Jaroslaw P. Maciejewski\*

\* Corresponding authors

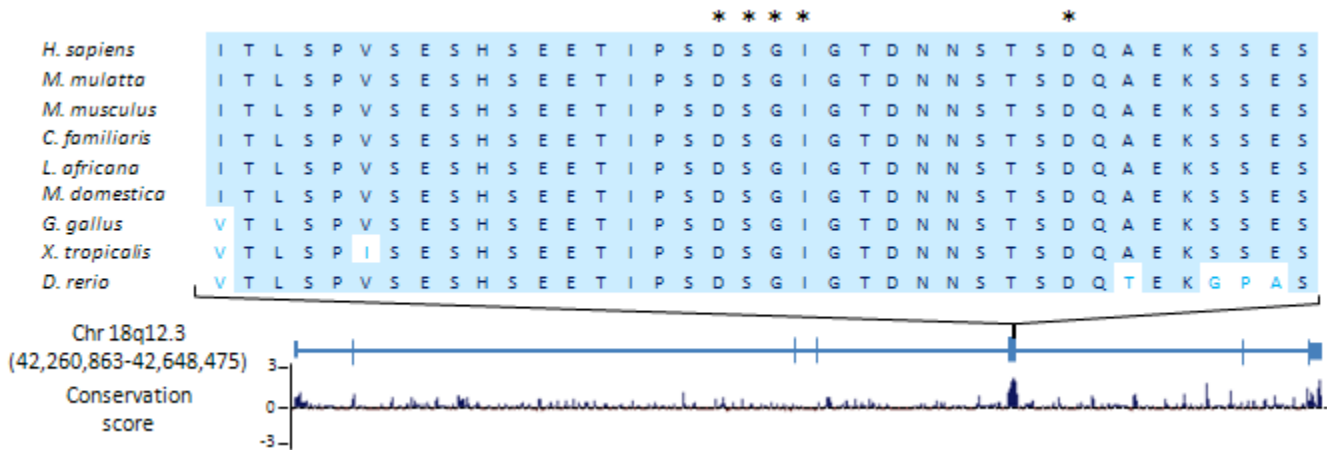

**Supplementary Figure 1. Alignment of amino acids within the SKI domain of SETBP1 from different species.**

Conserved amino acids are shown in dark blue with shadow. Mutated positions are indicated by asterisks. All affected residues are completely conserved throughout evolution (top). The conserved region of the whole *SETBP1* genome based on Placental Mammal Basewise Conservation by PhyloP (UCSC genome browser; <http://genome.ucsc.edu/cgi-bin/hgGateway>) (bottom).

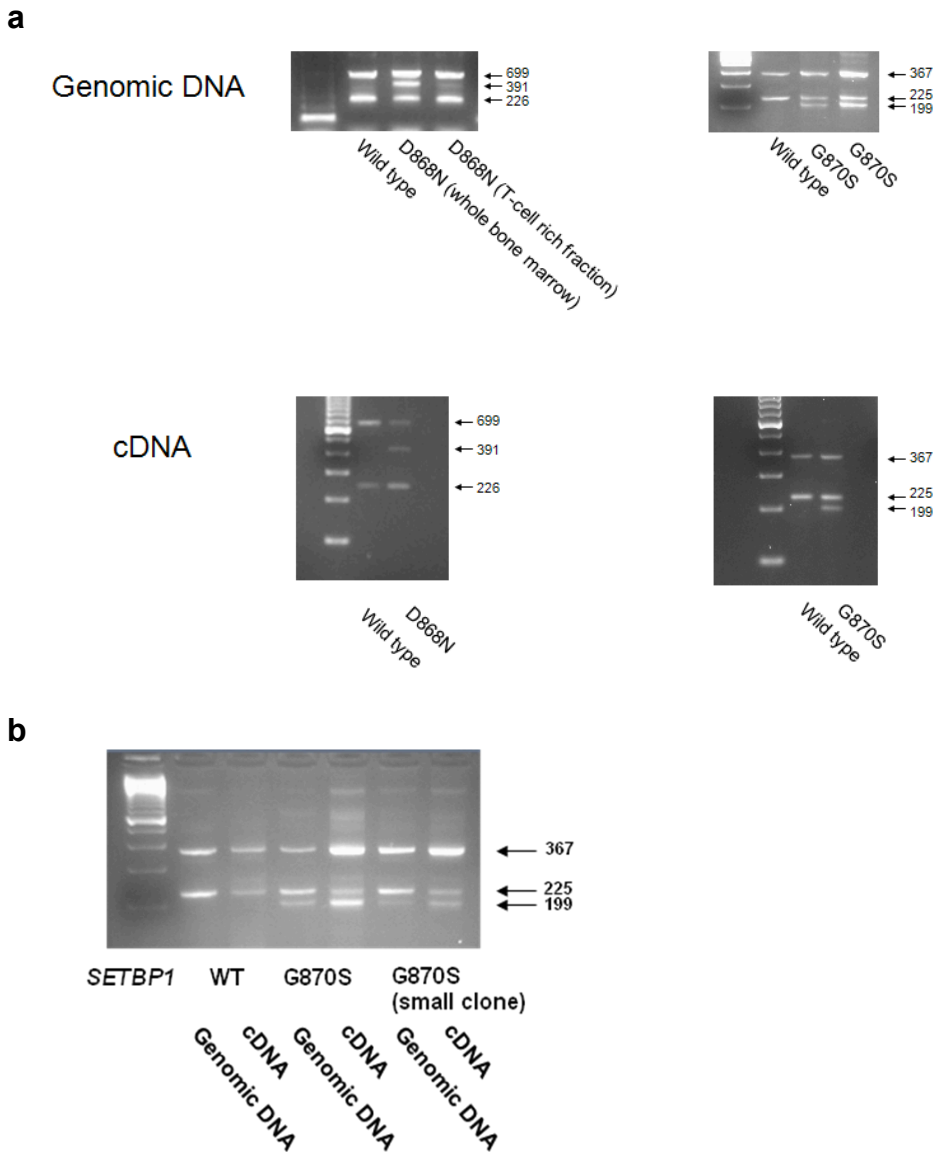

**Supplementary Figure 2. Allele specific PCR for detecting *SETBP1* p.Asp868Asn and p.Gly870Ser alterations.**

(a) Allele specific PCR was performed using genomic DNA (upper panel) and cDNA (lower panel) from cases with p.Asp868Asn or p.Gly870Ser alterations, and wild type *SETBP1*. Primer sets of each mutation are shown in Supplementary Table 14. For detection of p.Asp868Asn (c.2602G>A), product size by two outer primers was 699bp; A allele, 391bp; G allele, 226bp and for p.Gly870Ser (c.2608G>A), outer primers, 367bp; G allele, 225bp; A allele, 199bp. Mutant alleles were amplified using cDNA as genomic DNA. (b) In 2 cases with p.Gly870Ser alterations, genomic DNA and cDNA from the same cell fractions were tested in parallel.

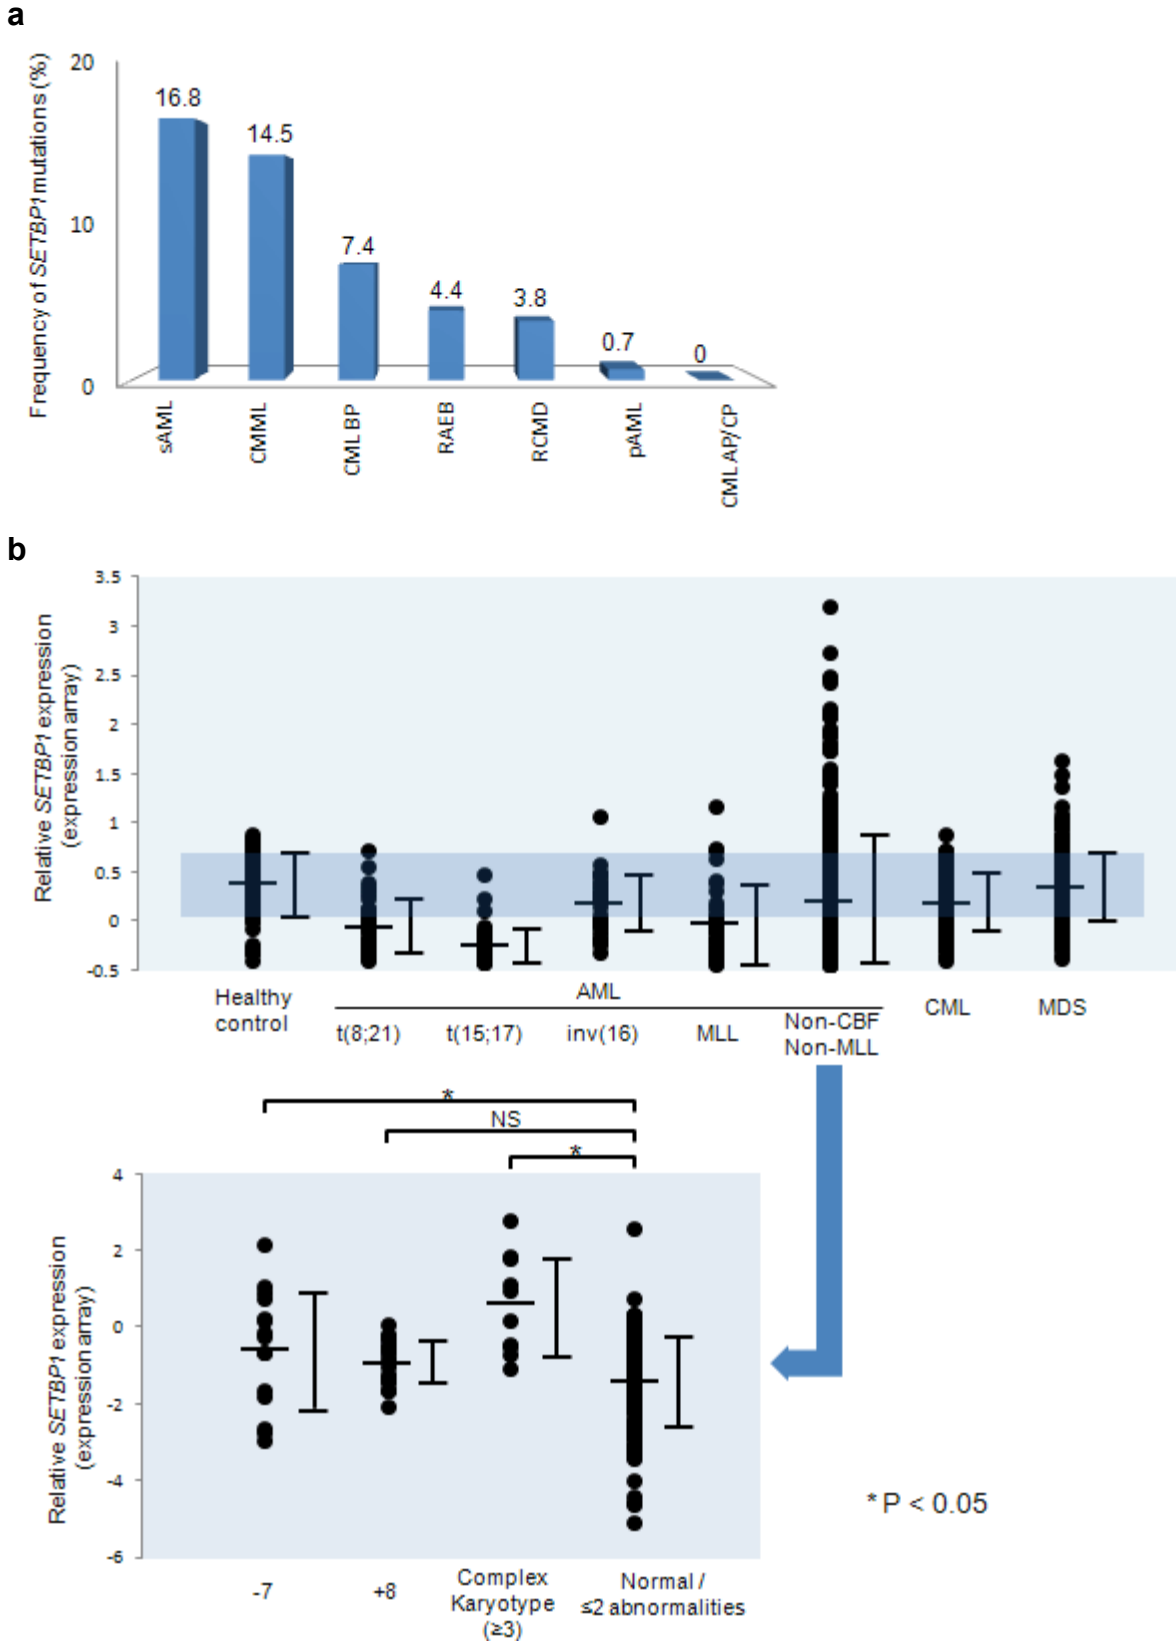

**Supplementary Figure 3. Frequency and phenotypic association of *SETBP1* mutations and overexpression in myeloid malignancies.**

(a) In the cohort of 727 cases with myeloid malignancies, *SETBP1* mutations were present in 16.8% of sAML with a history of antecedent MDS (19/113), 13.9% of CMML (22/152) and 7.4% of CML in blast phase (2/27) as well as 4.4% of RAEB (4/90). Mutations were less frequent in 3.8% of lower-risk MDS (3/85) and 0.7% of primary AML (pAML) (1/145). No mutations were observed in CML chronic/accelerated phase (CP/AP). (b) Using expression array database (Oncomine; <https://www.oncomine.org/>), the *SETBP1* transcript was found to be expressed in the bone marrow of healthy donors and various myeloid malignancies. While *SETBP1* expression is not elevated in core binding factor (CBF) leukemia or AML with MLL rearrangement, this gene was found to be overexpressed in a proportion of cases of non-CBF pAML, sAML and MDS (upper panel). In particular, *SETBP1* expression was significantly increased in -7 ( $P=0.03$ ) and cases with complex karyotype ( $P<0.001$ ), but not in +8 ( $P=0.39$ ) (lower panel). Horizontal bars in each disease category indicate mean values of *SETBP1* expression and error bars show mean $\pm$ s.d. The blue area in the lower panel represents the range of mean $\pm$ s.d. in healthy controls. Asterisks (\*) indicate statistical significance ( $P<0.05$ ) when individual disease categories were compared. NS; not significant.

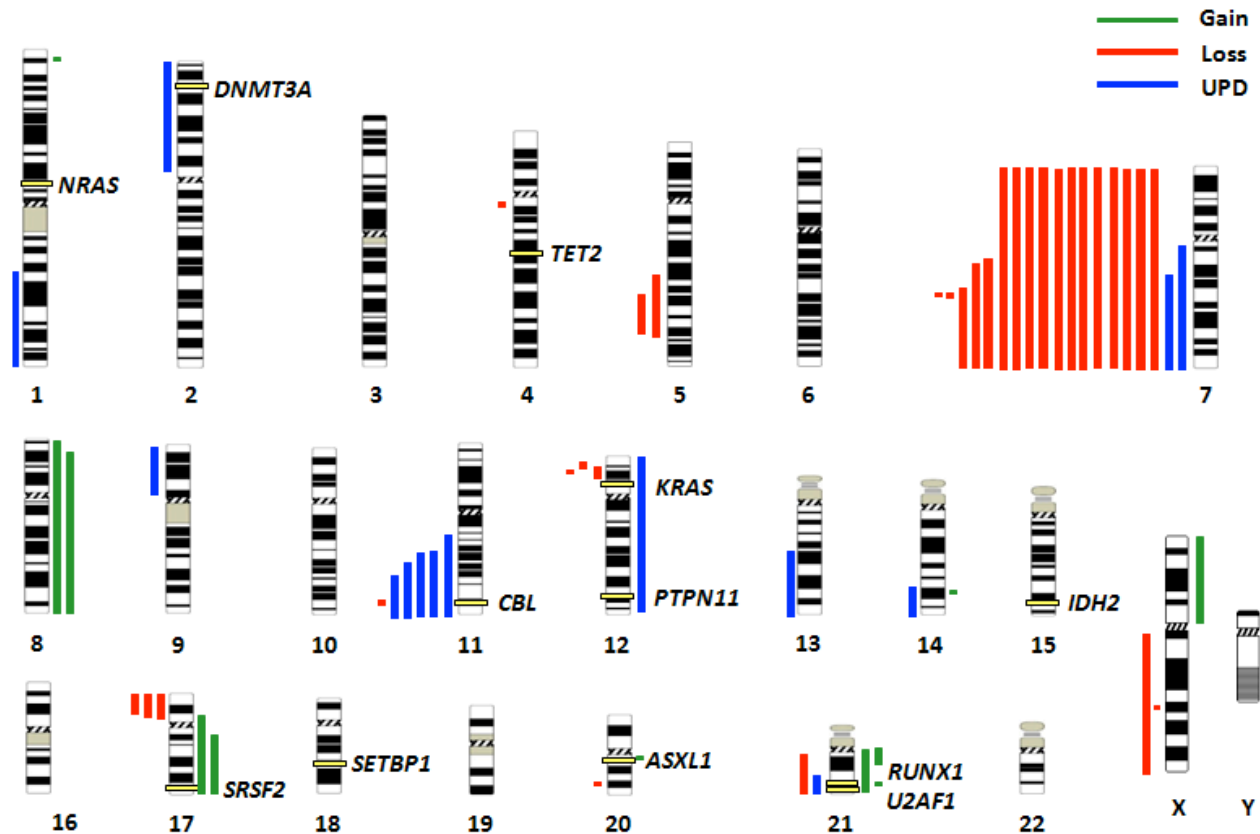

**Supplementary Figure 4. Karyotype analyses in cases with *SETBP1* mutations.**

Each line represents chromosomal aberration: green - copy number gains, red - losses and blue - regions of UPD. Totally, 57 aberrations were detected by metaphase cytogenetics and/or single nucleotide polymorphism-array karyotyping in 46 cases with *SETBP1* mutations. Exact location of *NRAS*, *DNMT3A*, *TET2*, *CBL*, *KRAS*, *PTPN11*, *IDH2*, *SRSF2*, *SETBP1*, *ASXL1*, *RUNX1* and *U2AF1* were shown by yellow bars.

**a**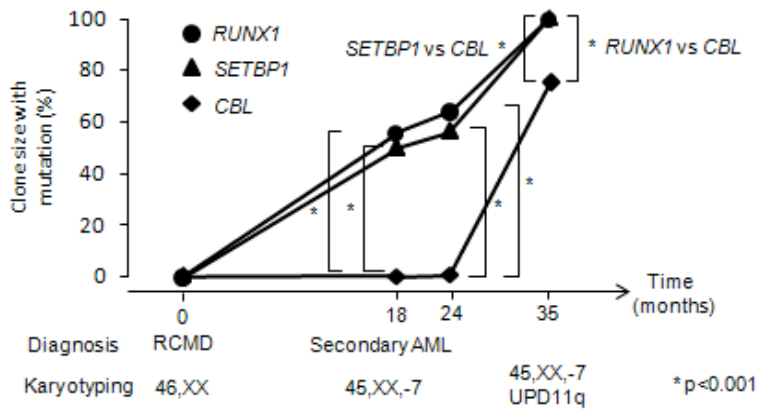**b**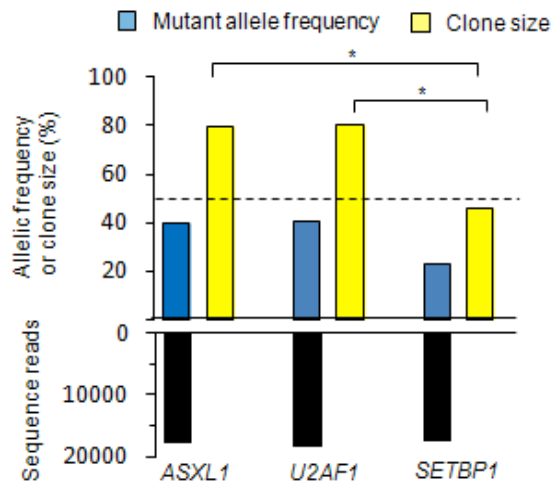**c**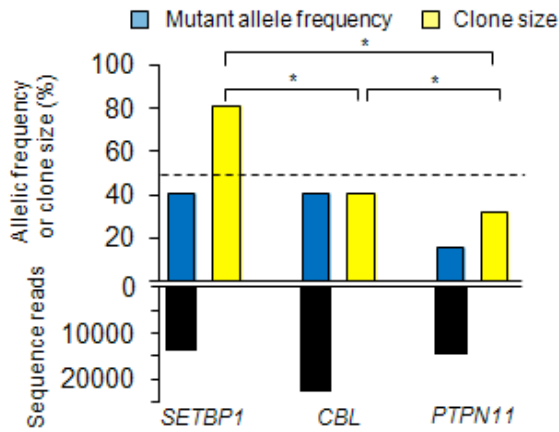

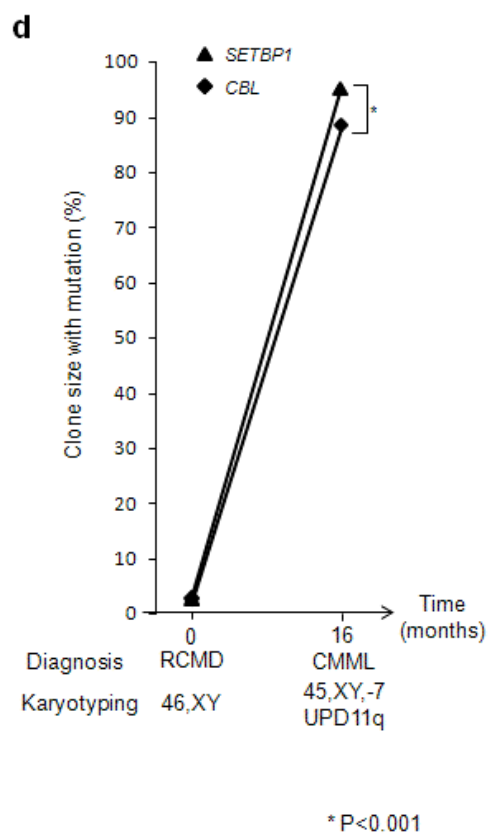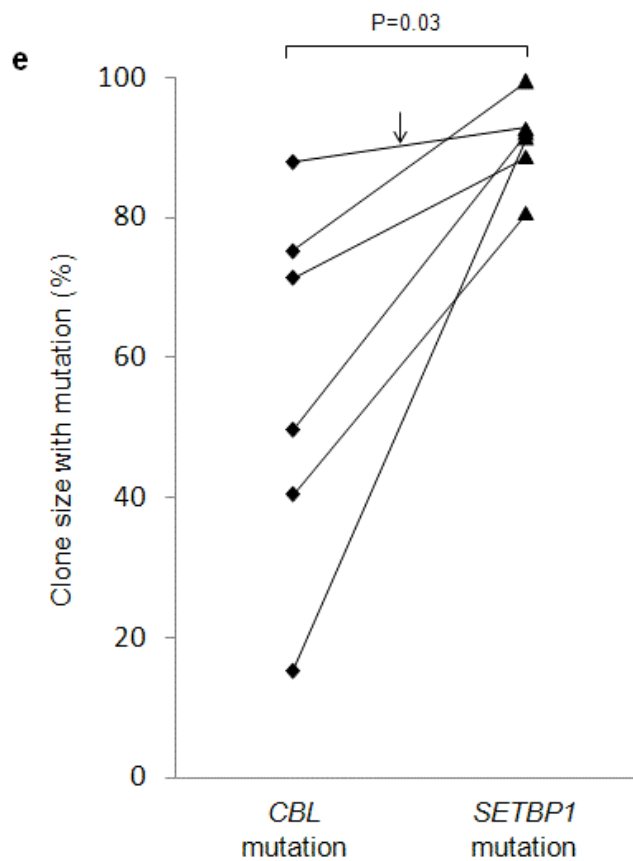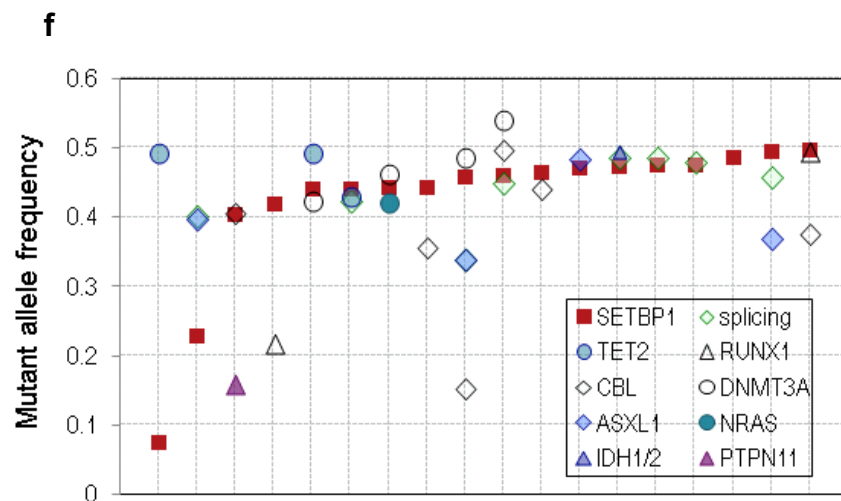



**Supplementary Figure 5. *SETBP1* and other concomitant mutations acquired in clinical course.**

(a) The evaluation of an estimated mutated clone size defined by read counts as obtained in targeted deep sequencing helped to understand acquired molecular events. In a case of sAML, 4 serial samples were evaluated. While *RUNX1* and *SETBP1* mutations emerged at almost the same time in the leukemic evolution, a *CBL* mutation was observed in the later stage. (b) In a separate case with RCMD, the clone size of a *SETBP1* mutation was 46% (total sequence reads; 17516), while clone sizes of an *ASXL1* and *U2AF1* mutations were 79% (18230) and 80% (18230), respectively. The clone size of a *SETBP1* mutation was significantly smaller than that of *ASXL1* or *U2AF1* mutation, supporting the theory that *SETBP1* mutations were acquired in a subclone with *ASXL1* or *U2AF1* mutations. (c) In a RAEB case with *SETBP1* mutation, concomitant hemizygous *CBL* and heterozygous *PTPN11* mutations were found. By targeted deep sequencing, the clone size of a heterozygous *SETBP1* mutation was 81% (total reads; 13707), while the clone sizes of *CBL* and *PTPN11* mutations were 41% (22563) and 32 % (14511), respectively. The sizes of these 3 mutated clones were significantly different from each other ( $P < 0.001$ , each). (d) In a case with CMML, leukemic evolution with -7 was observed 16 months after the initial presentation. *SETBP1* and *CBL* mutations were acquired during clonal expansion of CMML. By targeted deep sequencing, clone size based on allelic frequency of mutation was evaluated. Clone sizes were 88% (*CBL* mutation; 16536 total sequence reads) and 93% (*SETBP1* mutation; 22395 total sequence reads), which were significantly different ( $P < 0.001$ ). (e) Comparison of clone sizes based on allelic frequency and heterozygosity between *CBL* and *SETBP1* mutations showed that *CBL* mutation clones were smaller than that with *SETBP1* mutation in all tested cases ( $n=6$ ). Paired statistical analysis confirmed significant difference between *CBL* and *SETBP1* mutation clone size. An arrow indicates the case presented in (d). (f) Remarkably, most of the *SETBP1* mutations examined (17/19) showed comparable or higher allele frequencies compared to other coexisting mutations, suggesting that these *SETBP1* mutations seemed to rapidly take over the dominant tumor population, even though many of them were thought to be acquired upon/during leukemic evolution.

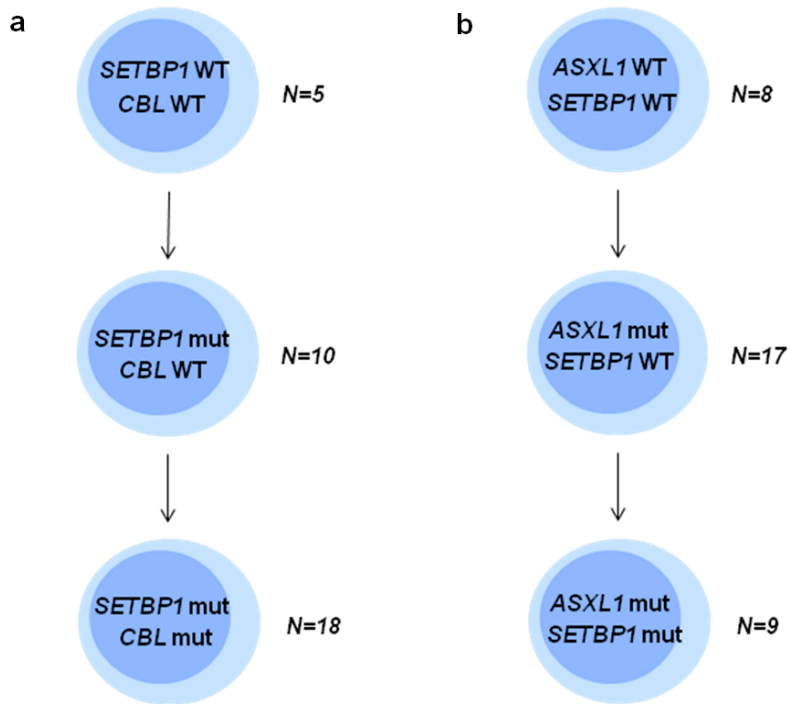

**Supplementary Figure 6. Analysis of concomitant mutations in the cases with *SETBP1* mutation.**

Individual CFU-GMs were examined after culturing bone marrow mononuclear cells in semisolid media for 12 days in 2 cases with *SETBP1* mutation. We confirmed mutations in *SETBP1* as well as concomitant mutations by Sanger sequencing. (a) *SETBP1* Ile871Thr mutations were detected in 85% of examined colonies, while *CBL* frameshift mutations (at Gln409fs c.1227\_1227del) were observed in the part (64%) of such colonies with *SETBP1* mutations. No colony represented the combination with WT *SETBP1* and mutant *CBL*, indicating that *CBL* mutation was acquired in the subclone with *SETBP1* mutation. (b) *ASXL1* frameshift mutations (at Arg634fs c.1900\_1901del) were detected in main clone (76% of all colonies), and *SETBP1* p.Gly870Ser were observed in subclone with an *ASXL1* mutation (35% of *ASXL1*-mutated colonies).

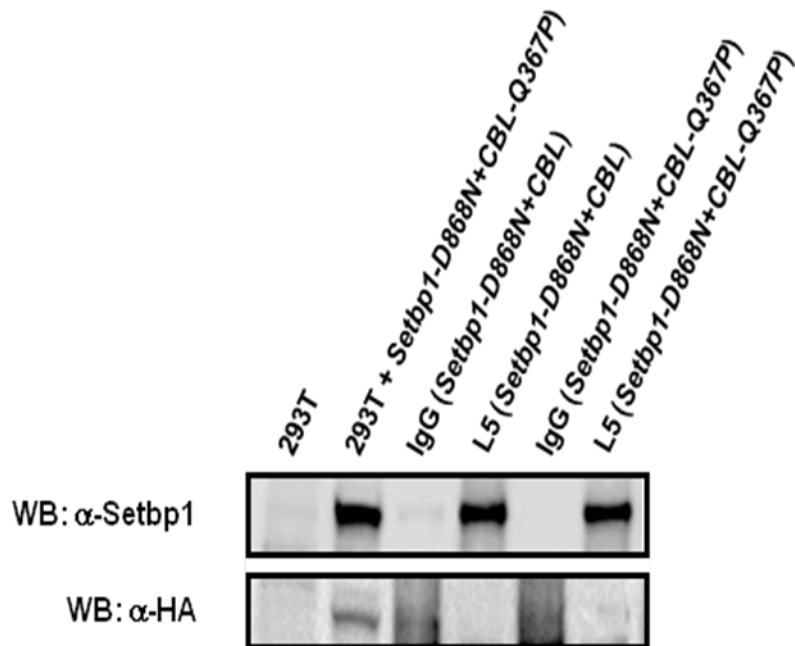

**Supplementary Figure 7. Absence of direct interaction between Setbp1 and CBL proteins.**

Immunoprecipitates prepared using control IgG or anti-FLAG L5 agarose beads (BioLegend) were analyzed by Western blotting analysis using antibodies specific for Setbp1 and HA tag. Whole-cell extracts from untransfected 293 T cells and 293T cells co-transfected with expression constructs of *Setbp1* and *CBL* mutations (encoding p.Asp868Asn and p.Gln367Pro) were included as controls. Immunoprecipitation was performed using Universal Co-IP Kit (Active Motif) from whole-cell extracts prepared from 293T cells at 48 hours after transfection with indicated combinations of FLAG-tagged mutant Setbp1 and HA-tagged wild-type and mutant *CBL* expression constructs.

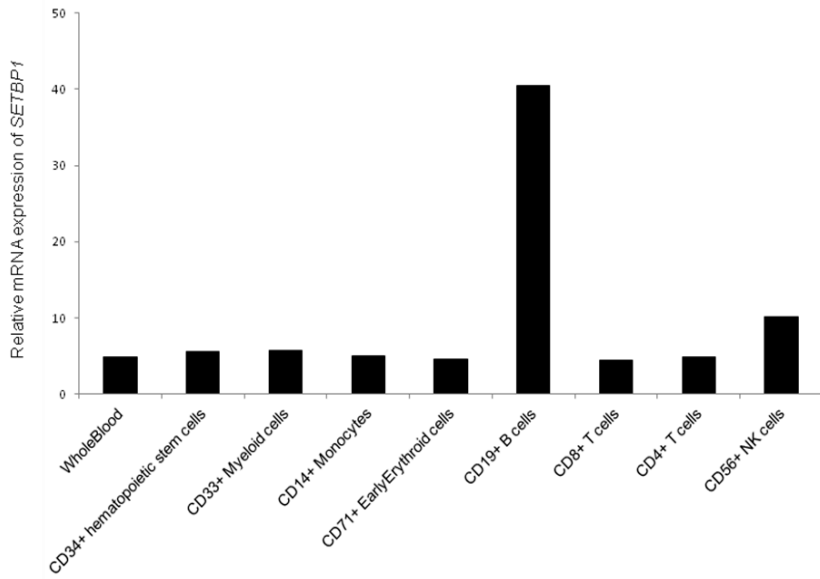

**Supplementary Figure 8. Relative expression of *SETBP1* in hematopoietic cells.**

*SETBP1* mRNA expression in various fractions of hematopoietic cells were extracted from GeneAtlas U133A expression array results posted in BioGPS (<http://biogps.org/>).

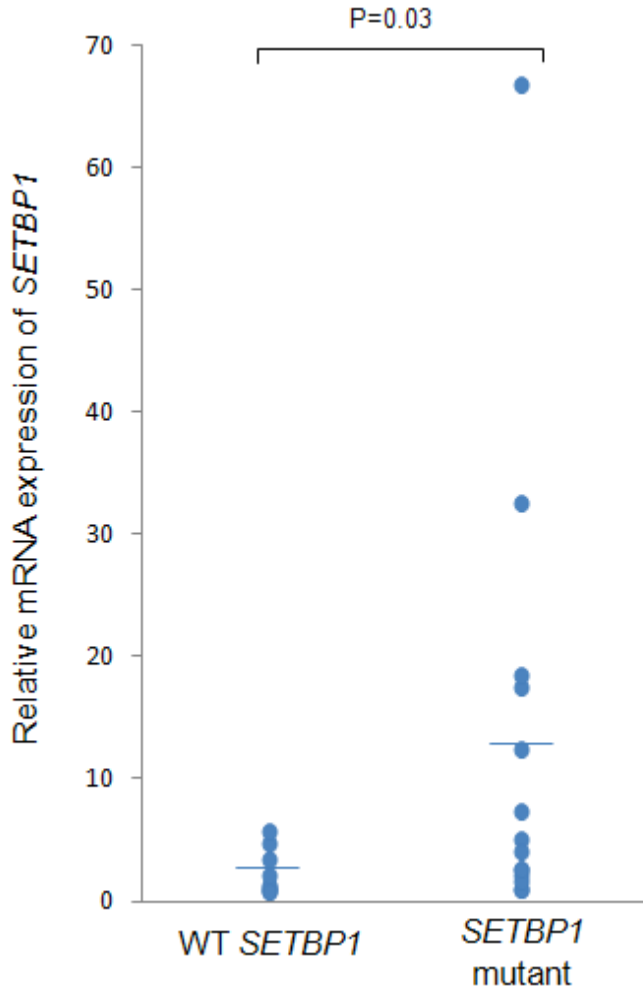

**Supplementary Figure 9. mRNA expressions of *SETBP1* in bone marrow mononuclear cells.**

mRNA expressions of *SETBP1* were assessed by quantitative real time PCR in myeloid malignancy cases with wild type *SETBP1* (N=9) and with *SETBP1* mutations (N=14). Mean of relative mRNA expression (horizontal bars in each group) was significantly higher in the group with *SETBP1* mutation than with WT *SETBP1* (P=0.03).

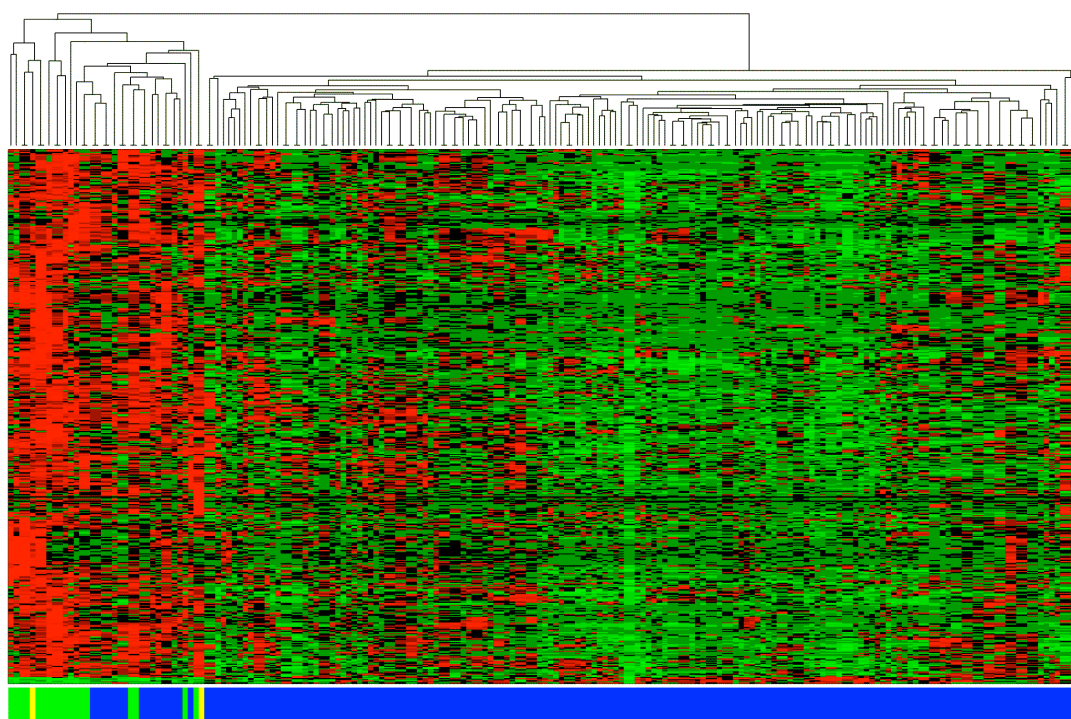

**Supplementary Figure 10. Gene expression profiling associated with *SETBP1* mutation.**

Expression array results were obtained from TCGA data portal (<http://tcga-data.nci.nih.gov>, LAML dataset). Samples were divided into two groups; high expresser cases were selected as top 10th percentile of *SETBP1* relative expression values (N=20) and remaining patients with WT *SETBP1* were assigned to normal/low *SETBP1* expressers. Statistical significance between level of expression in high vs normal/low group was assessed using Student t-Test ( $p < 0.05$ , Bonferroni adjusted, N=488). Cases were hierarchically clustered using complete Euclidean distance between patients. The color of grids represents expression levels, as red and green indicate higher and lower values. Yellow, green and blue colors at the bottom of the figure show the cases with *SETBP1* mutation, higher expression and normal/low expression of WT *SETBP1*, respectively.

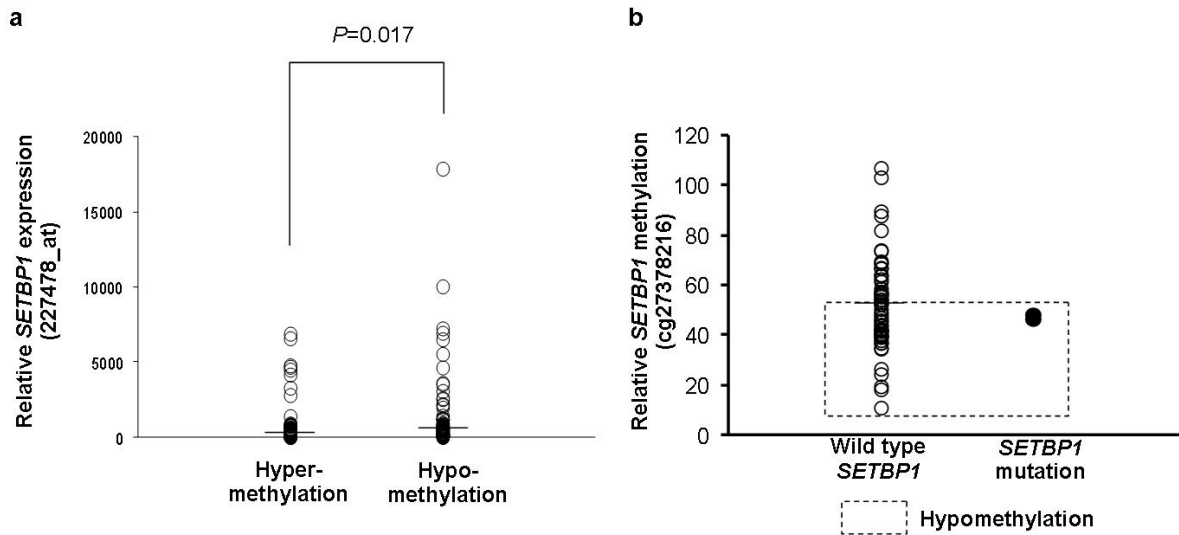

**Supplementary Figure 11. Methylation levels associated with *SETBP1* overexpression and mutation.**

(a) Methylation array and expression array results were obtained from TCGA database (<http://cancergenome.nih.gov/>). The values of methylation on a *SETBP1* CpG site (cg27378216) in AML (N=191) were dichotomized into hyper- and hypo-methylation groups by the median value. Statistical significance between levels of gene expression in hyper-/hypo-methylation groups was assessed using Wilcoxon test. The levels of *SETBP1* expression in the cases with hypo-methylation were significantly lower than in the hyper-methylation group ( $P=0.017$ ). The bars indicate mean values of relative *SETBP1* expression.

(b) Methylation array data of the independent cases with MDS, MDS/MPN and AML (N=63) on the identical probe demonstrated that methylation levels in the cases with *SETBP1* mutations (CMML and sAML; black) were lower than mean value of WT cases (white). The bar indicates the mean value of methylation levels in WT.

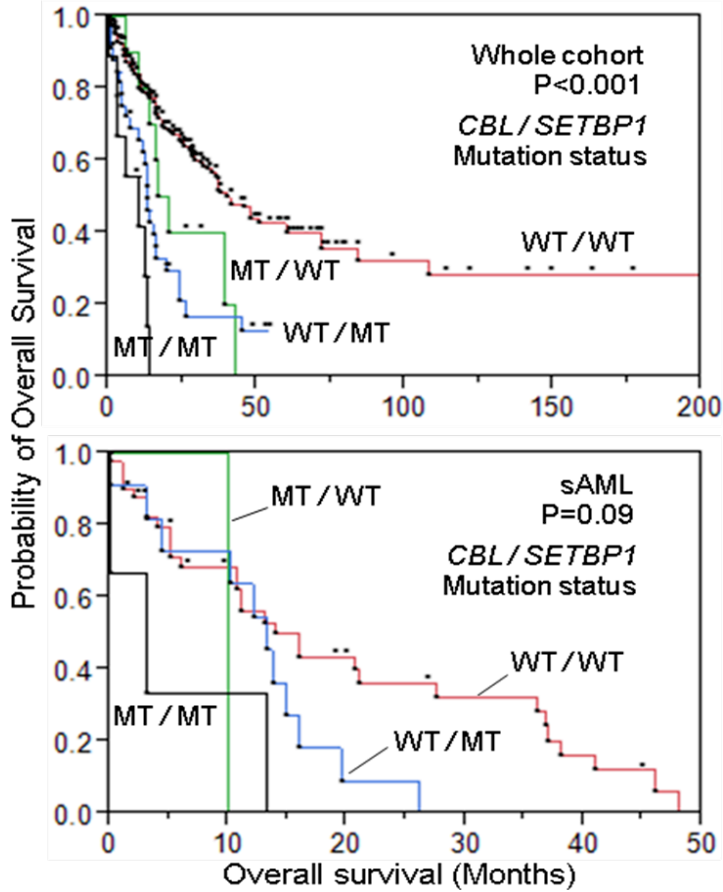

**Supplementary Figure 12. Impact of *SETBP1* and *CBL* mutational status on overall survival in the whole cohort and sAML cohort.**

Comparisons (overall survival analyses) in the cohorts of all cases and sAML cases between 4 groups with  $SETBP1^{WT}/CBL^{WT}$ ,  $SETBP1^{WT}/CBL^{mutation(mut)}$ ,  $SETBP1^{mut}/CBL^{WT}$  and  $SETBP1^{mut}/CBL^{mut}$ . In whole cohort, a statistically significant difference was detected ( $P < 0.001$ ), while in sAML cohort, there was no significant difference ( $P = 0.09$ ). Dots indicate events and censors.



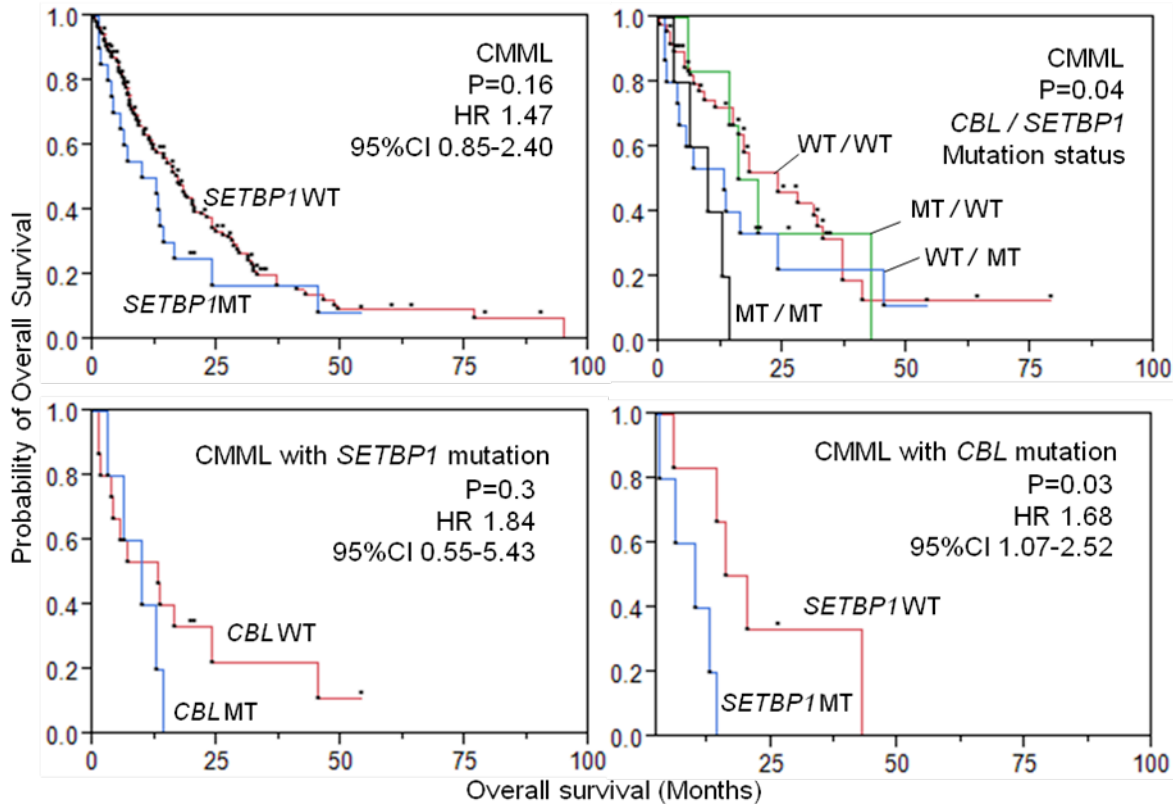

**Supplementary Figure 13. Overall survival analysis in the CMML cohort.**

All four panels represent comparisons (overall survival analyses) in the CMML cohort. While the upper left panel shows no significant difference between the cases with *SETBP1* wild type (WT) and mutation (MT), the upper right panel displays a statistically significant difference among 4 groups with *SETBP1*<sup>WT</sup>/*CBL*<sup>WT</sup>, *SETBP1*<sup>WT</sup>/*CBL*<sup>mutation(mut)</sup>, *SETBP1*<sup>mut</sup>/*CBL*<sup>WT</sup> and *SETBP1*<sup>mut</sup>/*CBL*<sup>mut</sup>. In the lower left, the analysis of isolated CMML cases with *SETBP1* mutation represents no survival impact of *CBL* mutation status, however, in the lower right, survival curves of CMML with *CBL* mutation demonstrate a statistically significant difference between the cases with *SETBP1* mutation (MT) and wild type (WT). Dots indicate events and censors.

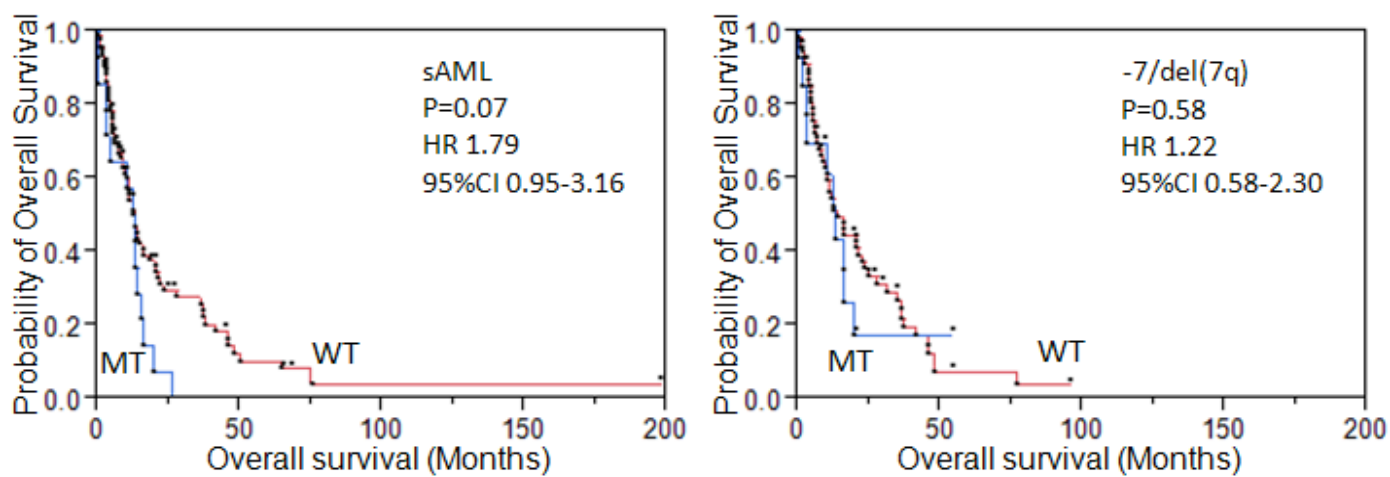

**Supplementary Figure 14. Overall survival analysis in subgroups of myeloid malignancies.**

Comparisons (overall survival analyses) in the cohorts of sAML and -7/del(7q) between *SETBP1* mutations (MT) and wild type (WT). There was no significant difference of overall survival between MT and WT. Dots indicate events and censors.

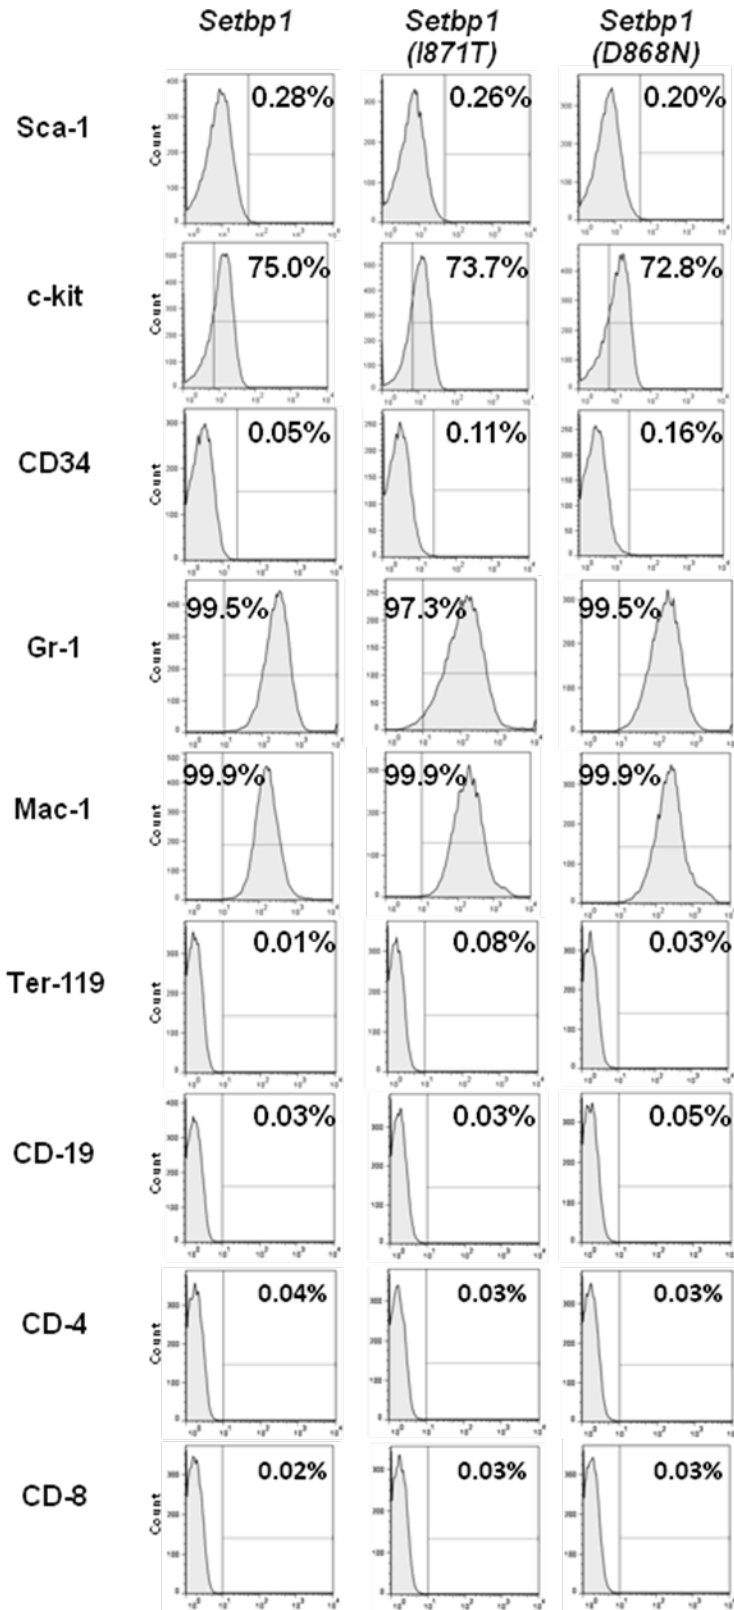

**Supplementary Figure 15. Myeloid progenitors immortalized by wild type (WT) and mutant *Setbp1* share similar marker expression profiles.**

FACS analysis of indicated marker expression by typical murine myeloid progenitors immortalized by WT and mutant *Setbp1*. Dead cells were excluded by staining with Sytox Blue (Invitrogen). All samples were analyzed on a BD LSRII flow cytometer.

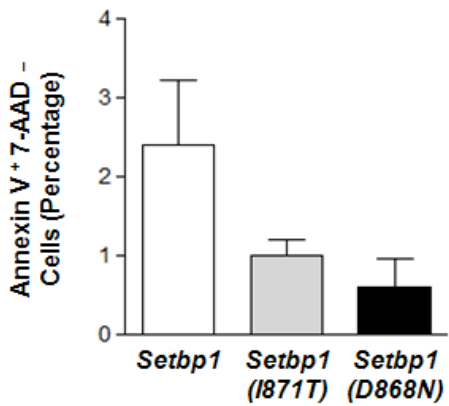

**Supplementary Figure 16. Analysis of apoptosis in immortalized myeloid progenitors.**

Analysis of apoptotic cells (Annexin V<sup>+</sup>7-AAD<sup>-</sup>) in myeloid progenitor populations immortalized by the expression of WT and mutant *Setbp1*. Mean and s.d. of percentage of apoptotic cells from three independently immortalized cell populations for each retroviral expression construct are shown.

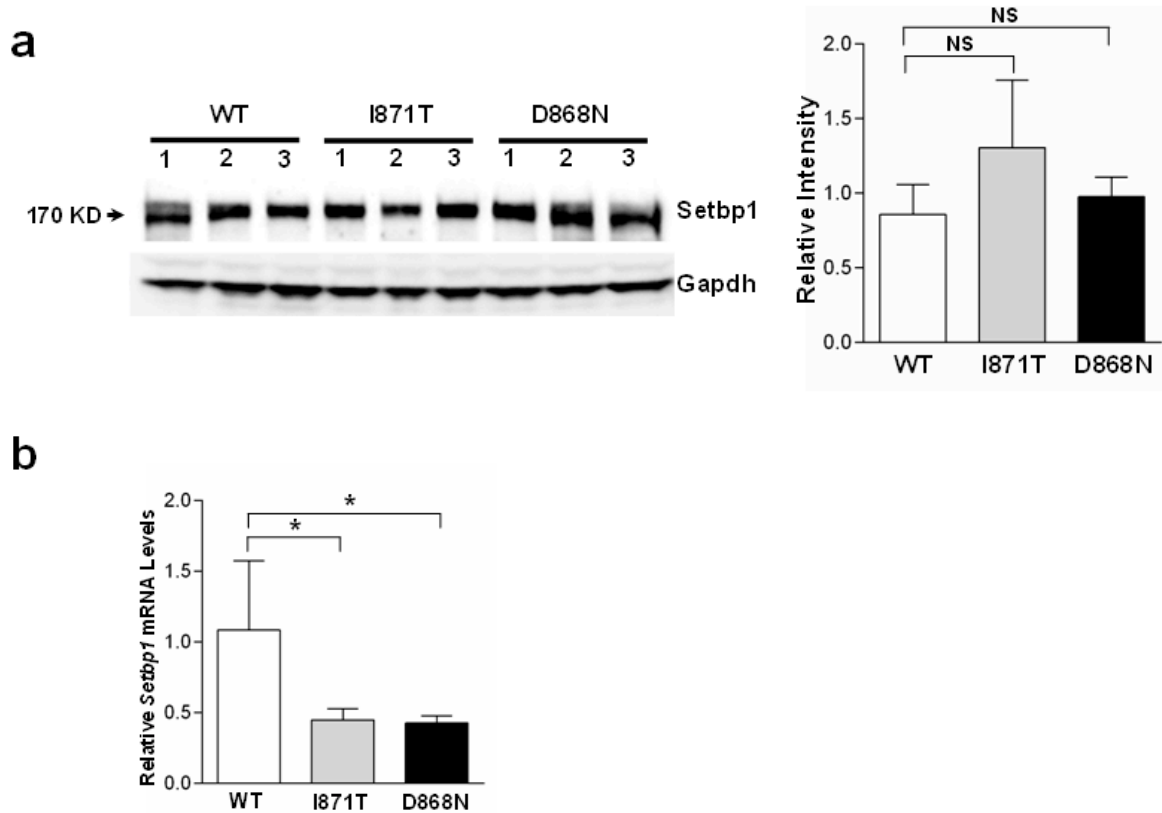

**Supplementary Figure 17. Setbp1 protein levels are similar in myeloid progenitor cells immortalized by wild-type (WT) and mutant *Setbp1*.**

(a) Left panel, Setbp1 protein expression was assessed by Western blotting analysis in myeloid progenitor populations independently immortalized by WT (WT-1-3) and mutant *Setbp1* (p.Ile871Thr-1-3 and p.Asp868Asn-1-3). Protein bands were visualized by incubation with SuperSignal West chemiluminescent substrate (Pierce). Setbp1 antibody has been described previously.<sup>1</sup> Right panel, quantification of Western blotting analysis shown in left panel. Relative Setbp1 protein levels in each immortalization group of cells after normalization to Gapdh levels (mean with s.d.) are shown. Protein bands were quantified using Quantity One data analysis software (Bio-Rad). NS, not significant. Note that no statistically significant difference was observed among groups. (b) Real-time RT-PCR analysis, using *Setbp1*-specific primers, of total RNA isolated from WT, p.I871T, and p.Asp868Asn groups of immortalized myeloid progenitor cells analyzed in (a). Relative mRNA levels were calculated after normalization to  $\beta$ -actin and represented as mean with s.d. \*,  $P < 0.05$ . Note that WT cells have significantly higher *Setbp1* mRNA levels than the other two groups. Given similar Setbp1 protein levels present in the three groups, this difference in transcript levels suggests that WT Setbp1 protein is less stable than mutant Setbp1 proteins.

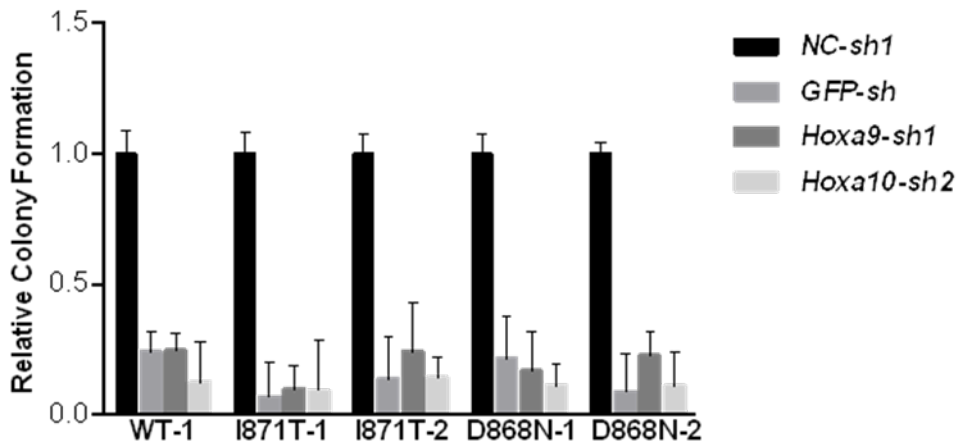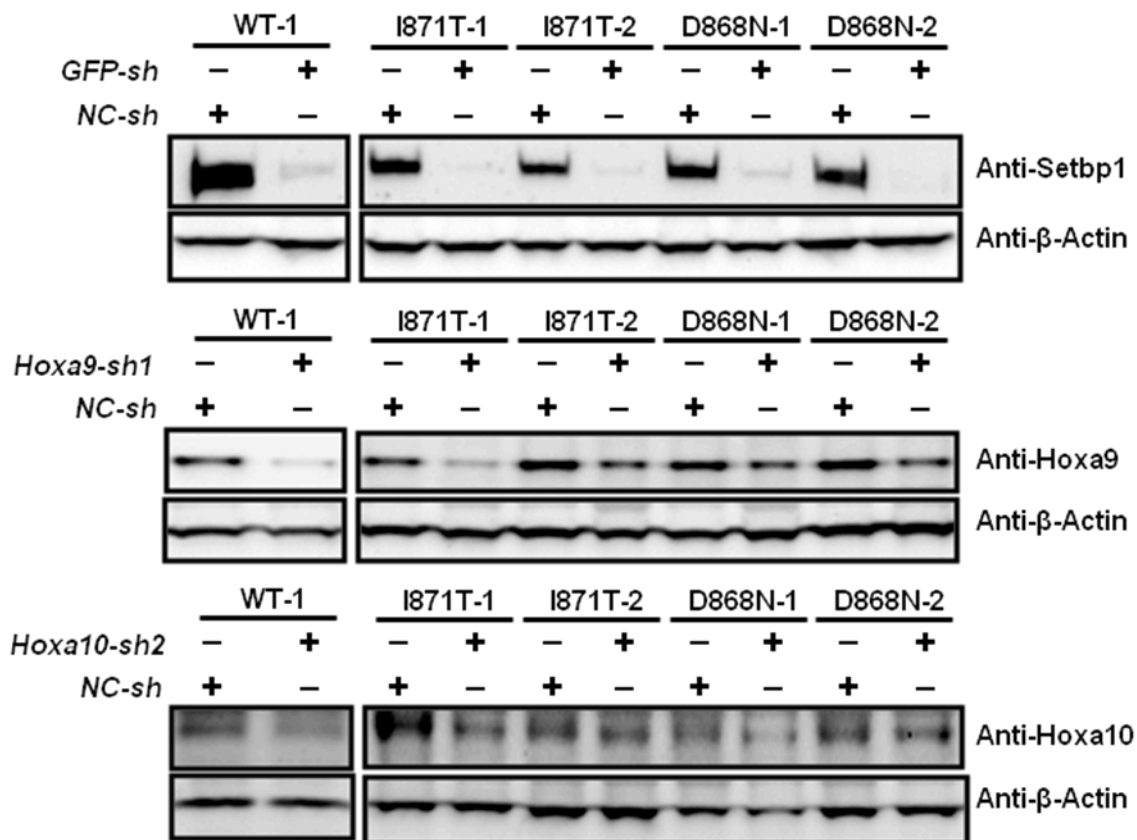

**Supplementary Figure 18. *Setbp1*, *Hoxa9*, and *Hoxa10* knockdown in myeloid progenitor cells immortalized with wild-type (WT) and mutant *Setbp1* reduces colony formation.** Upper panel, mean and s.d. of colony formation potential of indicated immortalized cells in the presence of SCF and IL-3 at 48 hours after infection with shRNAs specific for exogenous *Setbp1* (*GFP-sh*), *Hoxa9* (*Hoxa9-sh1*), *Hoxa10* (*Hoxa10-sh2*) and control shRNA (*NC-sh*); lower panels, representative Western blotting analyses of *Setbp1*, *Hoxa9*, *Hoxa10*, and  $\beta$ -Actin protein in the infected cells of the upper panel at 72 hours after infection. All shRNA constructs and infection procedure were described previously (Oakley, et al.)<sup>1</sup>.



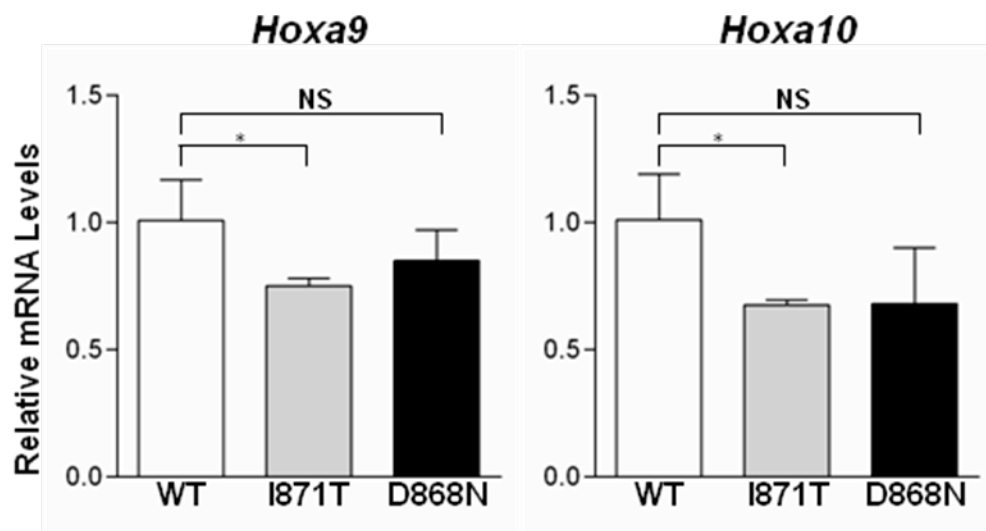

**Supplementary Figure 19. Similar levels of *Hoxa9*, and *Hoxa10* mRNA are expressed in myeloid progenitor cells immortalized by wild-type (WT) and mutant *Setbp1*.**

Real-time RT-PCR analysis, using gene-specific primers, of total RNA isolated from WT (n=3), p.Ile871Thr (n=3), and p.Asp868Asn (n=3) *Setbp1*-immortalized myeloid progenitor cells. Relative mRNA levels were calculated after normalization to  $\beta$ -actin and represented as mean with s.d. NS, not significant; \*,  $P < 0.05$ .

**a**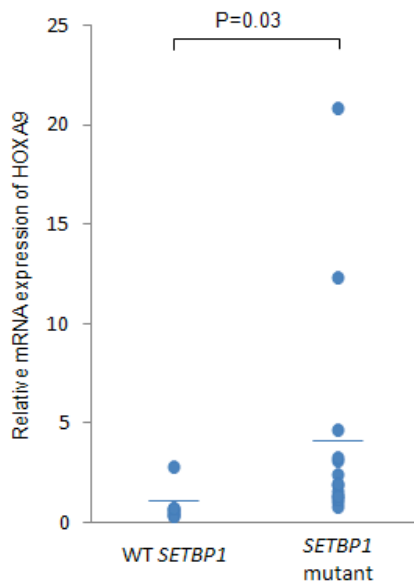**b**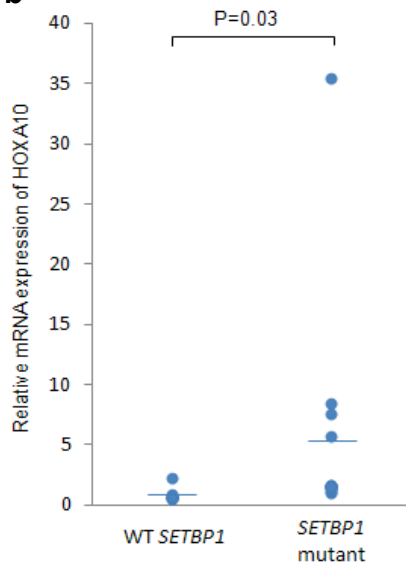

**Supplementary Figure 20. mRNA expressions of *HOXA9* and *HOXA10* in bone marrow mononuclear cells.**

Relative mRNA expressions of *HOXA9* (a) and *HOXA10* (b) were measured by quantitative real time PCR in myeloid malignancy cases with WT *SETBP1* (N=9) and with *SETBP1* mutations (N=14). In both analyses, there were significant differences between WT and mutant (P=0.03 and P=0.03, respectively). Horizontal bars indicate mean values.

**a**

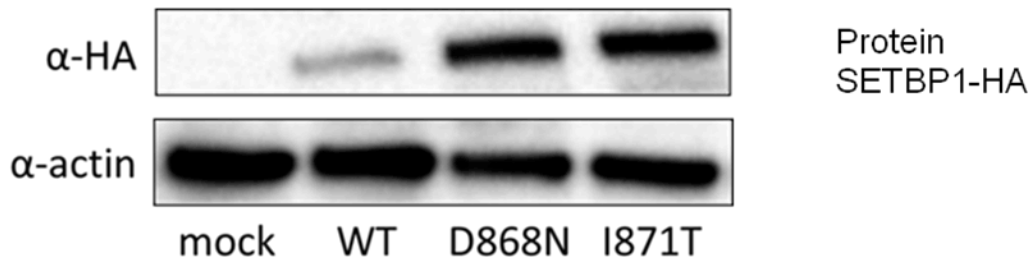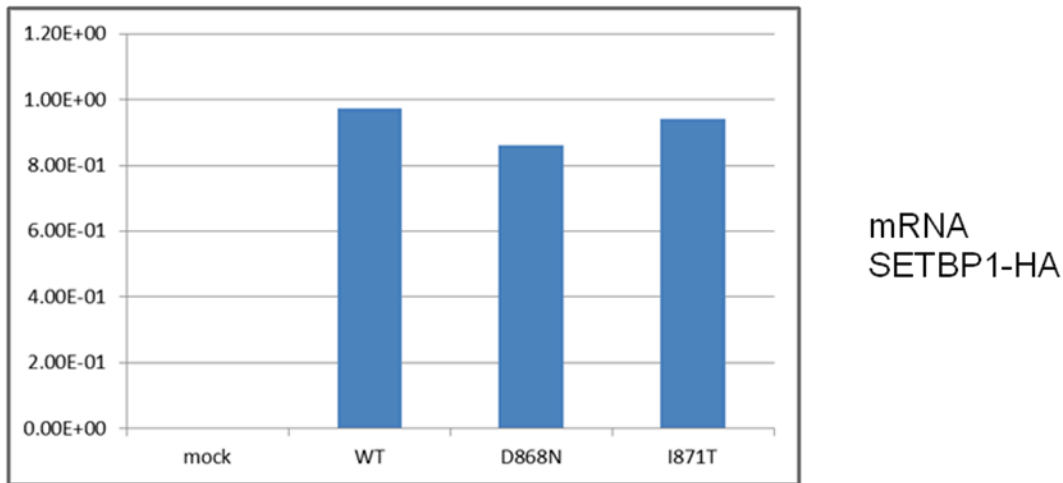

**b**

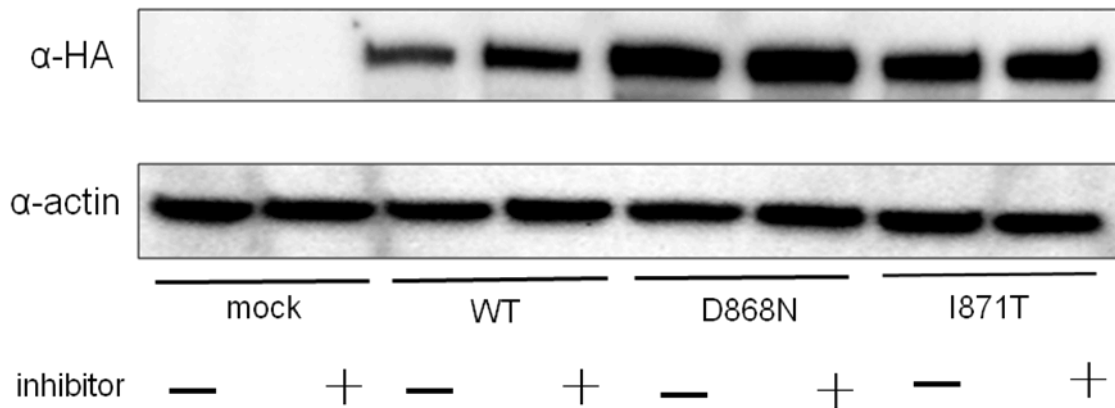

**Supplementary Figure 21. SETBP1 protein degradation associated with SETBP1 mutational status.**

By Western blotting of Jurkat cells stably transduced with wild-type and mutant *SETBP1* by lentivirus-mediated gene transfer. (a) Mutant SETBP1 protein expressed higher than wild-type protein in spite of similar mRNA levels. (b) Wild-type SETBP1 protein level increased by adding proteasome inhibitor, and this effect was not seen in mutant protein.

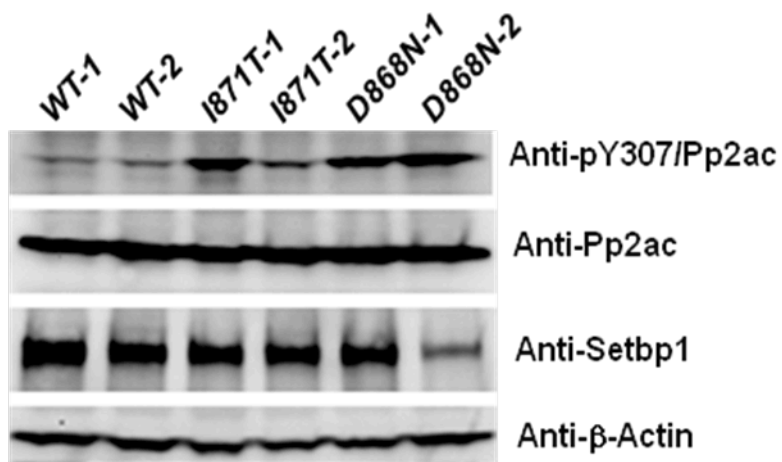

**Supplementary Figure 22. Myeloid cells immortalized by *Setbp1* mutants have increased levels of Pp2ac phosphorylation.**

Western blotting analysis using antibodies specific for p.Tyr307 phosphorylated Pp2ac, total Pp2ac, *Setbp1* and  $\beta$ -Actin in whole cell extracts prepared from myeloid cells immortalized by wild-type *Setbp1* (WT-1 and -2) or 2 different *Setbp1* mutations (corresponding to p.Ile871Thr-1,-2 and p.Asp868Asn-1,-2).

**Supplementary Table 1. Clinical characteristics of individual patients analyzed by next generation whole exome sequencing.**

| Case number for whole exome sequencing | Diagnosis | <i>SETBP1</i> mutation/alteration | Case number in supplementary Table 5 |
|----------------------------------------|-----------|-----------------------------------|--------------------------------------|
| whole exome sequencing #1              | sAML      | Wild type                         | N/A                                  |
| whole exome sequencing #2              | sAML      | Wild type                         | N/A                                  |
| whole exome sequencing #3              | CMML-1    | Wild type                         | N/A                                  |
| whole exome sequencing #4              | RAEB-2    | c.2602G>A, p.Asp868Asn            | #11                                  |
| whole exome sequencing #5              | RCMD      | Wild type                         | N/A                                  |
| whole exome sequencing #6              | PMF       | Wild type                         | N/A                                  |
| whole exome sequencing #7              | CMML-2    | Wild type                         | N/A                                  |
| whole exome sequencing #8              | sAML      | Wild type                         | N/A                                  |
| whole exome sequencing #9              | RAEB-1    | Wild type                         | N/A                                  |
| whole exome sequencing #10             | RARS      | Wild type                         | N/A                                  |
| whole exome sequencing #11             | pAML      | Wild type                         | N/A                                  |
| whole exome sequencing #12             | RARS-T    | Wild type                         | N/A                                  |
| whole exome sequencing #13             | RAEB-2    | c.2602G>A, p.Asp868Asn            | #13                                  |
| whole exome sequencing #14             | RCMD      | Wild type                         | N/A                                  |
| whole exome sequencing #15             | CMML-1    | Wild type                         | N/A                                  |
| whole exome sequencing #16             | MDS/MPN-U | Wild type                         | N/A                                  |
| whole exome sequencing #17             | sAML*     | Wild type                         | N/A                                  |
| whole exome sequencing #18             | RAEB-1    | Wild type                         | N/A                                  |
| whole exome sequencing #19             | RCMD      | Wild type                         | N/A                                  |
| whole exome sequencing #20             | MDS/MPN-U | Wild type                         | N/A                                  |

RCMD, refractory cytopenia with multilineage dysplasia; RARS, refractory anemia with ring sideroblasts; MDS/MPN-U, myelodysplastic syndrome/myeloproliferative neoplasms unclassifiable; CMML, chronic myelomonocytic leukemia; RARS-T, RARS associated with marked thrombocytosis; PMF, primary myelofibrosis; AML, acute myeloid leukemia; pAML, primary AML; sAML, secondary AML.

NE; not evaluated, N/A; not applicable.

\* Therapy related AML.

**Supplementary Table 2. Whole exome sequencing of an individual patient with *SETBP1* mutation (whole exome sequencing case #4).**

| Gene          | Exonic Function   | Amino acid Change                   | Chromosome | Start     | End       | Reference | Observation |
|---------------|-------------------|-------------------------------------|------------|-----------|-----------|-----------|-------------|
| <i>CUX1</i>   | nonsynonymous SNV | NM_001202543:c.3920G>A;p.Arg1307*   | chr7       | 101882864 | 101882864 | G         | A           |
| <i>TET2</i>   | stopgain SNV      | NM_001127208:c.4618C>T;p.Gln1540*   | chr4       | 106196285 | 106196285 | C         | T           |
| <i>TET2</i>   | nonsynonymous SNV | NM_001127208:c.4249G>T;p.Val1417Phe | chr4       | 106193787 | 106193787 | G         | T           |
| <i>SRSF2</i>  | nonsynonymous SNV | NM_003016:c.284C>T;p.Pro95Leu       | chr17      | 74732959  | 74732959  | G         | A           |
| <i>SETBP1</i> | nonsynonymous SNV | NM_015559:c.2602G>A;p.Asp868Asn     | chr18      | 42531907  | 42531907  | G         | A           |

**Supplementary Table 3. Whole exome sequencing of an individual patient with *SETBP1* mutation (whole exome sequencing case #13).**

| Gene          | Exonic Function     | Amino acid Change               | Chromosome | Start     | End       | Reference | Observation |
|---------------|---------------------|---------------------------------|------------|-----------|-----------|-----------|-------------|
| <i>CBL</i>    | nonsynonymous SNV   | NM_005188:c.1139T>C;p.Leu380Pro | chr11      | 119148919 | 119148919 | T         | C           |
| <i>SETBP1</i> | nonsynonymous SNV   | NM_015559:c.2602G>A;p.Asp868Asn | chr18      | 42531907  | 42531907  | G         | A           |
| <i>PTPN11</i> | nonsynonymous SNV   | NM_002834:c.181G>A;p.Asp61Asn   | chr12      | 112888165 | 112888165 | G         | A           |
| <i>ASXL1</i>  | frameshift deletion | NM_015338:c.2095delC;p.Pro699fs | chr20      | 31022610  | 31022610  | C         | -           |

**Supplementary Table 4. Whole exome sequencing of individual patients without *SETBP1* mutation.**

| Whole exome Case # | Gene          | Exonic Function      | Annotation   | Chromosome | Observation      | Amino acid change | Start     | End       |
|--------------------|---------------|----------------------|--------------|------------|------------------|-------------------|-----------|-----------|
| 2                  | <i>EZH2</i>   | nonsynonymous SNV    | NM_001203249 | chr7       | c.1901G>A        | p.Arg634His       | 148506443 | 148506443 |
| 2                  | <i>SGPP2</i>  | nonsynonymous SNV    | NM_152386    | chr2       | c.1016G>A        | p.Arg339His       | 223423433 | 223423433 |
| 2                  | <i>TET2</i>   | frameshift insertion | NM_001127208 | chr4       | c.2196_2197insT  | p.Pro732fs        | 106157295 | 106157295 |
| 2                  | <i>TET2</i>   | frameshift deletion  | NM_001127208 | chr4       | c.3851delC       | p.Ser1284fs       | 106180823 | 106180823 |
| 3                  | <i>CSF3R</i>  | stopgain SNV         | NM_000760    | chr1       | c.2245C>T        | p.Gln749*         | 36932224  | 36932224  |
| 3                  | <i>TET2</i>   | stopgain SNV         | NM_001127208 | chr4       | c.3765C>A        | p.Tyr1255*        | 106164897 | 106164897 |
| 3                  | <i>TET2</i>   | stopgain SNV         | NM_001127208 | chr4       | c.1648C>T        | p.Arg550*         | 106156747 | 106156747 |
| 8                  | <i>DNMT3A</i> | frameshift deletion  | NM_153759    | chr2       | c.418delG        | p.Gly140fs        | 25470489  | 25470489  |
| 8                  | <i>LUC7L2</i> | stopgain SNV         | NM_016019    | chr7       | c.79C>T          | p.Arg27*          | 139060825 | 139060825 |
| 8                  | <i>U2AF1</i>  | nonsynonymous SNV    | NM_001025203 | chr21      | c.470A>G         | p.Gln157Arg       | 44514777  | 44514777  |
| 10                 | <i>SF3B1</i>  | nonsynonymous SNV    | NM_012433    | chr2       | c.2098A>G        | p.Lys700Glu       | 198266834 | 198266834 |
| 11                 | <i>PCBP2</i>  | frameshift insertion | NM_001098620 | chr12      | c.505_506insC    | p.Ser169fs        | 53856277  | 53856277  |
| 11                 | <i>PRPF8</i>  | nonsynonymous SNV    | NM_006445    | chr17      | c.3921G>A        | p.Met1307Ile      | 1565301   | 1565301   |
| 11                 | <i>RIT1</i>   | nonsynonymous SNV    | NM_006912    | chr1       | c.245T>G         | p.Phe82Cys        | 155874286 | 155874286 |
| 11                 | <i>STAG2</i>  | frameshift insertion | NM_006603    | chrX       | c.3393_3394insTC | p.Arg1131fs       | 123224540 | 123224540 |
| 12                 | <i>SF3B1</i>  | nonsynonymous SNV    | NM_012433    | chr2       | c.1866G>C        | p.Glu622Asp       | 198267491 | 198267491 |
| 14                 | <i>RAD21</i>  | stopgain SNV         | NM_006265    | chr8       | c.201T>A         | p.Tyr67*          | 117875442 | 117875442 |
| 14                 | <i>TET2</i>   | nonsynonymous SNV    | NM_001127208 | chr4       | c.4138C>T        | p.His1380Tyr      | 106190860 | 106190860 |
| 15                 | <i>ASXL1</i>  | frameshift insertion | NM_015338    | chr20      | c.2253_2254insG  | p.Val751fs        | 31022768  | 31022768  |
| 15                 | <i>CBL</i>    | nonsynonymous SNV    | NM_005188    | chr11      | c.1246T>C        | p.Cys416Arg       | 119149238 | 119149238 |
| 15                 | <i>PTEN</i>   | nonsynonymous SNV    | NM_000314    | chr10      | c.353A>G         | p.His118Arg       | 89692869  | 89692869  |
| 15                 | <i>RUNX1</i>  | frameshift deletion  | NM_001122607 | chr21      | c.393delT        | p.Phe131fs        | 36252888  | 36252888  |
| 15                 | <i>SRSF2</i>  | nonsynonymous SNV    | NM_003016    | chr17      | c.284C>A         | p.Pro95His        | 74732959  | 74732959  |
| 15                 | <i>TET2</i>   | frameshift deletion  | NM_001127208 | chr4       | c.4541delT       | p.Leu1514fs       | 106196208 | 106196208 |
| 15                 | <i>TET2</i>   | nonsynonymous SNV    | NM_001127208 | chr4       | c.3862G>A        | p.Gly1288Ser      | 106180834 | 106180834 |
| 17                 | <i>CDH23</i>  | nonsynonymous SNV    | NM_022124    | chr10      | c.4394G>A        | p.Gly1465Glu      | 73499435  | 73499435  |
| 17                 | <i>GPR98</i>  | nonsynonymous SNV    | NM_032119    | chr5       | c.6269G>A        | p.Arg2090His      | 89980007  | 89980007  |
| 18                 | <i>DNMT3A</i> | nonsynonymous SNV    | NM_153759    | chr2       | c.2077C>T        | p.Arg693Cys       | 25457243  | 25457243  |
| 19                 | <i>TP53</i>   | nonsynonymous SNV    | NM_001126116 | chr17      | c.263A>G         | p.Tyr88Cys        | 7578190   | 7578190   |

SNV; single nucleotide variation



**Supplementary Table 5. Clinical characteristics of patients with *SETBP1* mutation.**

| case | Age (years) | Sex | <i>SETBP1</i> mutation/alteration | Diagnosis | Karyotyping                                              |
|------|-------------|-----|-----------------------------------|-----------|----------------------------------------------------------|
| 1    | 67          | F   | c.2602G>A, p.Asp868Asn            | sAML      | No metaphase                                             |
| 2    | 81          | M   | c.2602G>A, p.Asp868Asn            | sAML      | No metaphase                                             |
| 3    | 63          | M   | c.2602G>A, p.Asp868Asn            | RAEB      | 45,XY,-7[20]                                             |
| 4    | 71          | M   | c.2602G>A, p.Asp868Asn            | sAML      | 46,XY[6]                                                 |
| 5    | 57          | M   | c.2608G>A, p.Gly870Ser            | CMML2     | 46,XY[20]                                                |
| 6    | 71          | M   | c.2608G>A, p.Gly870Ser            | sAML      | 46,XY,del(7)(q11.2)[10]/46,XY,add(12)(q24.3)[7]/46,XY[3] |
| 7    | 70          | M   | c.2602G>A, p.Asp868Asn            | CMML2     | 46,XY,t(7;8)(q22;q24.3)[9]/46,XY[11]                     |
| 8    | 77          | M   | c.2608G>A, p.Gly870Ser            | RAEB      | 47,XY,+11[4]/47,sl,-17,+mar[8]/48,sd1,+8[2]/46,XY[7]     |
| 9    | 77          | M   | c.2602G>A, p.Asp868Asn            | sAML      | 46,XY[20]                                                |
| 10   | 56          | M   | c.2602G>A, p.Asp868Asn            | CMML1     | 46,XY,del(20)(q11.2q13.3)[20]                            |
| 11   | 63          | F   | c.2602G>A, p.Asp868Asn            | RAEB      | 45,XX,-7[3]/46,XX,del(11)(q23)[8]/47,idem,+11[10]        |
| 12   | 83          | M   | c.2602G>A, p.Asp868Asn            | CMML1     | 46,XY,del(7q)(q22)[18]/46,XY[2]                          |
| 13   | 80          | F   | c.2602G>A, p.Asp868Asn            | RAEB      | 46,XX,der(21)t(1;21)(q10;p10)[11]/46,XX[9]               |
| 14   | 79          | F   | c.2608G>A, p.Gly870Ser            | CMML1     | 45,XX,-7[5]/46,XX[15]                                    |
| 15   | N/A         | M   | c.2640C>A, p.Asp880Glu            | sAML      | 46,XY[20]                                                |
| 16   | 67          | M   | c.2608G>A, p.Gly870Ser            | CML BP    | 46,XY,t(9;22)(q34;q11.2)[20]                             |
| 17   | 34          | M   | c.2602G>A, p.Asp868Asn            | CMML2     | 45,XY,-7[20]                                             |
| 18   | 67          | M   | c.2608G>A, p.Gly870Ser            | CMML1     | 46,XY[20]                                                |
| 19   | 72          | F   | c.2608G>A, p.Gly870Ser            | sAML      | 45,XX,-7[20]                                             |
| 20   | 78          | F   | c.2602G>A, p.Asp868Asn            | CMML2     | 47,XX,+8[20]                                             |
| 21   | 79          | M   | c.2638G>A, p.Asp880Asn            | CMML1     | 47,XY,+21[4]/46,XY[22]                                   |
| 22   | 66          | F   | c.2602G>A, p.Asp868Asn            | sAML      | 46,XX[cp20]                                              |
| 23   | 26          | M   | c.2612T>C, p.Ile871Thr            | sAML      | 45,XY,-7[20]                                             |
| 24   | 48          | M   | c.2612T>C, p.Ile871Thr            | sAML      | 45,XY,-7[20]                                             |
| 25   | 69          | F   | c.2612T>C, p.Ile871Thr            | pAML      | N/A                                                      |
| 26   | 70          | M   | c.2602G>A, p.Asp868Asn            | sAML      | 45,XY,-7[5]/46,XY[15]                                    |
| 27   | 61          | F   | c.2608G>A, p.Gly870Ser            | sAML      | 46,XX,i(17)(q10)[7]/46,XX[18]                            |
| 28   | 74          | F   | c.2602G>T, p.Asp868Tyr            | CMML2     | N/A                                                      |
| 29   | 77          | F   | c.2602G>A, p.Asp868Asn            | CMML1     | No metaphase (-7 in SNP-array)                           |

|    |     |   |                           |                 |                                            |
|----|-----|---|---------------------------|-----------------|--------------------------------------------|
| 30 | 79  | M | c.2602G>A,<br>p.Asp868Asn | CMML1           | 46,XY[20]                                  |
| 31 | 67  | F | c.2602G>A,<br>p.Asp868Asn | CMML1           | 46,XX[20]                                  |
| 32 | 64  | M | c.2608G>A,<br>p.Gly870Ser | CMML1           | 46,XY,del(8)(p21p23)[6]/46,XY[14]          |
| 33 | 76  | M | c.2602G>A,<br>p.Asp868Asn | CMML2           | 46,XY,del(7)(q22;q36),t(7;12)(q22;p13)[20] |
| 34 | 60  | M | c.2602G>A,<br>p.Asp868Asn | sAML            | 46,XY,del(17)(p13)[20]                     |
| 35 | 56  | M | c.2602G>A,<br>p.Asp868Asn | CMML2           | 46,XY[24]/45,XY,t(8;10)(p12;p13)[1]        |
| 36 | 77  | F | c.2608G>A,<br>p.Gly870Ser | CMML1           | 46,XX[20]                                  |
| 37 | 79  | M | c.2602G>A,<br>p.Asp868Asn | CMML1           | No metaphase                               |
| 38 | 65  | F | c.2608G>A,<br>p.Gly870Ser | sAML            | 46,XX,del(21)(q11.2)[20]                   |
| 39 | 64  | M | c.2612T>C,<br>p.Ile871Thr | sAML            | 45,XY,-7[20]                               |
| 40 | 69  | F | c.2608G>A,<br>p.Gly870Ser | sAML            | 45,XX,-7[20]                               |
| 41 | 50  | M | c.2602G>A,<br>p.Asp868Asn | RCMD            | 46,XY[20]                                  |
| 42 | 55  | F | c.2602G>A,<br>p.Asp868Asn | CMML2           | 45,XX,-7[20]                               |
| 43 | 64  | F | c.2608G>A,<br>p.Gly870Ser | CMML1           | 46,XX[20]                                  |
| 44 | 79  | F | c.2612T>C,<br>p.Ile871Thr | RCMD            | 46,XX[20]                                  |
| 45 | N/A | F | c.2608G>A,<br>p.Gly870Ser | 5q-<br>syndrome | 46,XX,del(5)(q??)[20]                      |
| 46 | N/A | F | c.2608G>A,<br>p.Gly870Ser | PMF             | 46,XX[20]                                  |
| 47 | 68  | M | c.2602G>A,<br>p.Asp868Asn | CML BP          | 46,XY,t(9;22)(q34;q11.2)[20]               |
| 48 | 35  | M | c.2602G>A,<br>p.Asp868Asn | CMML1           | 46,XY[20]                                  |
| 49 | N/A | F | c.2606G>A,<br>p.Ser869Asn | sAML            | N/A                                        |
| 50 | 73  | F | c.2602G>A,<br>p.Asp868Asn | sAML            | 46,XX[20]                                  |
| 51 | 64  | M | c.2602G>A,<br>p.Asp868Asn | sAML            | 46,XY[20]                                  |
| 52 | 77  | F | c.2602G>A,<br>p.Asp868Asn | CMML2           | 46,XX[20]                                  |

F; female, M; male

RAEB, refractory anemia with excess blasts; sAML, secondary acute myeloid leukemia;

CMML, chronic myelomonocytic leukemia; CML BP, chronic myelogenous leukemia blast phase.

pAML, primary AML; RCMD, refractory cytopenia with multilineage dysplasia; PMF; primary myelofibrosis,

N/A; not available.

**Supplementary Table 6. Diagnosis of enrolled patients (N=727).\***

|                           |            |
|---------------------------|------------|
| MDS                       | <b>288</b> |
| Low risk*                 | <b>85</b>  |
| RCUD / RCMD / 5q- / MDS-U | <b>75</b>  |
| RARS                      | <b>10</b>  |
| High risk*                | <b>203</b> |
| RAEB ½                    | <b>90</b>  |
| Secondary AML             | <b>113</b> |
| MDS/MPN                   | <b>161</b> |
| CMML                      | <b>152</b> |
| MDS/MPN-U                 | <b>9</b>   |
| MPN                       | <b>133</b> |
| PV/PMF/ET                 | <b>70</b>  |
| CML                       | <b>63</b>  |
| AML                       |            |
| Primary AML               | <b>145</b> |

\* includes 4 cases with therapy related myeloid malignancies.

MDS, myelodysplastic syndromes; RCUD, refractory cytopenia with unilineage dysplasia; RCMD, refractory cytopenia with multilineage dysplasia; 5q-, MDS with isolated del(5q); MDS-U, MDS unclassifiable; RARS, refractory anemia with ring sideroblasts; RAEB, refractory anemia with excess blasts; AML, acute myeloid leukemia; MDS/MPN, MDS/myeloproliferative neoplasms; CMML, chronic myelomonocytic leukemia; PV, polycythemia vera; PMF, primary myelofibrosis; ET, essential thrombocytopenia; CML, chronic myelogenous leukemia.

**Supplementary Table 7. *SETBP1* sequencing in myeloid cell lines.**

| Cell line | <i>SETBP1</i> mutation status |
|-----------|-------------------------------|
| HEL       | wild type                     |
| HL60      | wild type                     |
| K562      | wild type                     |
| KASUMI    | wild type                     |
| KU812     | wild type                     |
| MEGA2     | wild type                     |
| MOLM13    | wild type                     |
| MUTZ8     | wild type                     |
| NKM1      | wild type                     |
| SKM1      | wild type                     |
| TF1       | wild type                     |
| THP1      | wild type                     |
| U937      | wild type                     |
| UT7       | wild type                     |
| KG1       | wild type                     |

**Supplementary Table 8. List of genes and their annotation screened by Sanger sequencing.**

| Genes         | Ensembl cDNA sequence | Amino acid | Coding exons | Sequenced exons |
|---------------|-----------------------|------------|--------------|-----------------|
| <i>SETBP1</i> | ENST00000282030       | 1596       | 2-6          | 2-6             |
| <i>RUNX1</i>  | ENST00000300305       | 480        | 2-9          | 2-9             |
| <i>ASXL1</i>  | ENST00000375687       | 1541       | 1-13         | 13              |
| <i>SRSF2</i>  | ENST00000392485       | 221        | 1-2          | 1               |
| <i>U2AF1</i>  | ENST00000291552       | 240        | 1-8          | 2, 6            |
| <i>CBL</i>    | ENST00000264033       | 906        | 1-16         | 8, 9            |
| <i>KRAS</i>   | ENST00000311936       | 188        | 2-5          | 2               |
| <i>NRAS</i>   | ENST00000369535       | 189        | 2-5          | 2               |
| <i>DNMT3A</i> | ENST00000264709       | 912        | 2-23         | 2-23            |
| <i>TET2</i>   | ENST00000380013       | 2002       | 3-11         | 3-11            |
| <i>IDH1</i>   | ENST00000345146       | 414        | 3-10         | 4               |
| <i>IDH2</i>   | ENST00000330062       | 452        | 2-11         | 4               |
| <i>FLT3</i>   | ENST00000241453       | 993        | 1-24         | 14, 15, 20      |
| <i>NPM1</i>   | ENST00000296930       | 294        | 1-11         | 11              |

**Supplementary Table 9. Concomitant mutational characteristics of myeloid malignancies with or without *SETBP1* mutations.**

| Mutated genes                   | Wild-type <i>SETBP1</i> | <i>SETBP1</i> mutant | <i>P</i> <sup>a</sup> |
|---------------------------------|-------------------------|----------------------|-----------------------|
| <i>RUNX1</i> % (no. of tested)  | 13.2 (159)              | 14.9 (47)            | 1                     |
| <i>ASXL1</i> % (no. of tested)  | 16.9 (183)              | 35.6 (45)            | 0.12                  |
| <i>SRSF2</i> % (no. of tested)  | 12.4 (234)              | 25.0 (52)            | 0.29                  |
| <i>U2AF1</i> % (no. of tested)  | 8.6 (234)               | 7.7 (52)             | 1                     |
| <i>CBL</i> % (no. of tested)    | 5.5 (217)               | 24.5 (49)            | <b>0.002</b>          |
| <i>KRAS</i> % (no. of tested)   | 3.1 (129)               | 4.3 (47)             | 1                     |
| <i>NRAS</i> % (no. of tested)   | 1.6 (129)               | 2.1 (47)             | 1                     |
| <i>DNMT3A</i> % (no. of tested) | 7.4 (175)               | 14.3 (42)            | 1                     |
| <i>TET2</i> % (no. of tested)   | 24.4 (226)              | 14.3 (49)            | 1                     |
| <i>IDH1/2</i> % (no. of tested) | 2.7 (224)               | 4.2 (48)             | 1                     |

<sup>a</sup> A Fisher's exact test was used to determine the *P* values. *P* values in multiple comparisons were evaluated by Bonferroni correction and statistically significant *p* values were indicated with bold font.

**Supplementary Table 10a. Comparison of gene expression profiles between cases with activated *SETBP1* (high expression and mutation) and *SETBP1* lower expression.**

| Gene            | ID           | P-value     | Bonferroni correction | Median (SETBP1 higher N=20) | Median (SETBP1 lower N=175) | SETBP1 mutant 1 | SETBP1 mutant 2 |
|-----------------|--------------|-------------|-----------------------|-----------------------------|-----------------------------|-----------------|-----------------|
| <i>SETBP1</i>   | 227478_at    | 4.24764E-52 | 2.74452E-47           | 6548.612                    | 361.284                     | 4636.983        | 7241.875        |
| <i>SETBP1</i>   | 205933_at    | 7.43583E-52 | 4.80452E-47           | 4733.851                    | 285.7097                    | 3213.413        | 6066.858        |
| <i>SETBP1</i>   | 239544_at    | 9.98619E-42 | 6.45238E-37           | 2426.1645                   | 317.3                       | 1464.423        | 2808.191        |
| <i>SETBP1</i>   | 234081_at    | 1.50558E-36 | 9.72798E-32           | 1176.07                     | 200.3678                    | 857.8883        | 1540.155        |
| <i>SETBP1</i>   | 242901_at    | 5.89482E-36 | 3.80882E-31           | 1403.6335                   | 201.2318                    | 946.9578        | 1462.484        |
| <i>hopx</i>     | 211597_s_at  | 8.71226E-24 | 5.62925E-19           | 35075.325                   | 4334.313                    | 14322.86        | 37723.21        |
| <i>sdk2</i>     | 242064_at    | 1.96613E-23 | 1.27038E-18           | 4906.8825                   | 501.5                       | 6206.753        | 7408.785        |
| <i>C3orf50</i>  | 234101_at    | 8.07924E-22 | 5.22024E-17           | 708.0427                    | 167.6234                    | 1516.864        | 1381.74         |
| <i>Pacsin1</i>  | 227053_at    | 1.38882E-21 | 8.97357E-17           | 2115.3155                   | 198.3                       | 3138.909        | 377.7048        |
| <i>Gnai1</i>    | 227692_at    | 1.92699E-21 | 1.24509E-16           | 8912.378                    | 1606.9                      | 4750.123        | 8868.102        |
| <i>tpm2</i>     | 204083_s_at  | 3.28038E-21 | 2.11955E-16           | 2297.823                    | 888.4855                    | 1337.42         | 2194.81         |
| <i>C5orf56</i>  | 230405_at    | 4.60273E-21 | 2.97396E-16           | 7354.6375                   | 2045.9                      | 7011.277        | 7697.998        |
| <i>SDK2</i>     | 234073_at    | 1.2856E-20  | 8.30662E-16           | 1392.3165                   | 278.8                       | 2653.982        | 1991.224        |
| <i>SETBP1</i>   | 236317_at    | 1.30384E-20 | 8.42449E-16           | 840.5025                    | 226.3                       | 717.1791        | 959.454         |
| <i>CARD11</i>   | 243154_at    | 1.94368E-20 | 1.25587E-15           | 2032.695                    | 603.0085                    | 6136.117        | 1246.337        |
| <i>PPP1R16B</i> | 41577_at     | 8.90915E-20 | 5.75647E-15           | 3143.807                    | 903.3415                    | 3234.174        | 1222.571        |
| <i>C3orf50</i>  | 1558411_at   | 1.31139E-19 | 8.47326E-15           | 3017.391                    | 93.27065                    | 5104.375        | 5444.332        |
| <i>KIAA1462</i> | 213316_at    | 2.70486E-19 | 1.74769E-14           | 1109.5741                   | 143.7947                    | 3900.839        | 1465.194        |
| <i>FLJ21443</i> | 233235_x_at  | 3.20869E-19 | 2.07323E-14           | 579.8981                    | 87.0378                     | 569.9943        | 781.7898        |
| <i>BCL11A</i>   | 219498_s_at  | 1.24452E-18 | 8.04122E-14           | 12428.305                   | 4882.4                      | 15191.14        | 10790.76        |
| <i>BCL11A</i>   | 222891_s_at  | 2.13906E-18 | 1.38211E-13           | 39166.18                    | 14332.61                    | 48026.52        | 36734.02        |
| <i>TCF4</i>     | 212386_at    | 1.04004E-17 | 6.71999E-13           | 31485.74                    | 8550.691                    | 42977.59        | 13077.29        |
| <i>TCF4</i>     | 212382_at    | 1.66712E-17 | 1.07717E-12           | 5513.164                    | 1876.4                      | 10684.52        | 2914.787        |
| <i>Gnai1</i>    | 209576_at    | 3.21335E-17 | 2.07624E-12           | 7763.7745                   | 1135.419                    | 2350.505        | 4113.144        |
| <i>TCF4</i>     | 222146_s_at  | 3.80234E-17 | 2.45681E-12           | 8222.6675                   | 2498.8                      | 12865.36        | 2206.889        |
| <i>TCF4</i>     | 212387_at    | 6.59807E-17 | 4.26321E-12           | 10387.921                   | 3414.4                      | 16826.18        | 4823.588        |
| <i>HMG2</i>     | 208025_s_at  | 1.40995E-16 | 9.11008E-12           | 1910.1355                   | 181.27                      | 2878.35         | 2542.064        |
| <i>FMNL3</i>    | 230640_at    | 1.72625E-16 | 1.11538E-11           | 233.9072                    | 774.9528                    | 630.415         | 630.415         |
| <i>DNTT</i>     | 1566363_at   | 2.21394E-16 | 1.43049E-11           | 85430.805                   | 1187.5                      | 103596          | 376.1903        |
| <i>TCF4</i>     | 203753_at    | 2.46294E-16 | 1.59138E-11           | 13403.04                    | 3900.4                      | 16594.23        | 4722.487        |
| <i>FAM30A</i>   | 220377_at    | 2.46837E-16 | 1.59489E-11           | 16589.76                    | 3251.696                    | 11033.2         | 12661.89        |
| <i>BCL11A</i>   | 219497_s_at  | 3.18311E-16 | 2.0567E-11            | 24128.825                   | 10304.18                    | 29857.54        | 21174.87        |
| <i>GBP4</i>     | 235175_at    | 4.40102E-16 | 2.84363E-11           | 2858.312                    | 916.2                       | 1729.073        | 5130.685        |
| <i>PPP1R16B</i> | 243771_at    | 5.22846E-16 | 3.37826E-11           | 1161.153                    | 271.2                       | 1349.659        | 1012.243        |
| <i>cobl</i>     | 213050_at    | 5.92293E-16 | 3.82698E-11           | 223.66045                   | 38.79073                    | 4518.953        | 630.8448        |
| <i>BCL11A</i>   | 1559078_at   | 1.58485E-15 | 1.02402E-10           | 10344.05                    | 5202.7                      | 24084.03        | 8864.822        |
| <i>PPP1R16B</i> | 212750_at    | 2.14054E-15 | 1.38307E-10           | 2235.744                    | 844.6588                    | 3364.438        | 1316.35         |
| <i>TCF4</i>     | 212385_at    | 2.28401E-15 | 1.47577E-10           | 4204.7775                   | 1651.969                    | 10568.32        | 1793.049        |
| <i>NRIP1</i>    | 202599_s_at  | 2.35958E-15 | 1.5246E-10            | 27198.855                   | 8347.368                    | 6123.393        | 75676.27        |
| <i>TCF4</i>     | 213891_s_at  | 2.83332E-15 | 1.83069E-10           | 19520.28                    | 5390.227                    | 25775.6         | 8292.616        |
| <i>ATP10A</i>   | 214255_at    | 2.89304E-15 | 1.86928E-10           | 4804.3015                   | 1094.1                      | 3661.393        | 4744.58         |
| <i>DNTT</i>     | 1566362_at   | 5.43205E-15 | 3.50981E-10           | 3613.625                    | 238.8                       | 9847.621        | 127.1477        |
| <i>DNTT</i>     | 210487_at    | 6.98692E-15 | 4.51446E-10           | 25338.525                   | 217.1                       | 46913.91        | 72.32637        |
| <i>Plkfb2</i>   | 226733_at    | 7.8227E-15  | 5.05448E-10           | 1689.653                    | 578.3586                    | 1937.122        | 851.749         |
| <i>KIAA1462</i> | 231841_s_at  | 8.67095E-15 | 5.60256E-10           | 504.5843                    | 18.6                        | 2072.045        | 680.7219        |
| <i>NRIP1</i>    | 202600_s_at  | 1.03711E-14 | 6.7011E-10            | 37155.125                   | 10139.15                    | 8107.348        | 85631.81        |
| <i>rasd1</i>    | 223467_at    | 1.55885E-14 | 1.00722E-09           | 3071.54                     | 597.7                       | 14801.37        | 228.3182        |
| <i>PRKD2</i>    | 209282_at    | 1.7355E-14  | 1.12136E-09           | 4370.675                    | 2191.4                      | 4622.849        | 5161.89         |
| <i>Tcf7l2</i>   | 236216_at    | 1.91893E-14 | 1.23988E-09           | 1137.0515                   | 259.8587                    | 1117.173        | 1729.938        |
| <i>foxo1</i>    | 202724_s_at  | 2.25888E-14 | 1.45953E-09           | 3017.266                    | 1202.157                    | 5126.283        | 7223.057        |
| <i>TCF4</i>     | 215164_at    | 2.40755E-14 | 1.55559E-09           | 2090.5565                   | 551.6531                    | 3968.74         | 822.6821        |
| <i>TCF4</i>     | 228837_at    | 2.81736E-14 | 1.82038E-09           | 1163.214                    | 356.7                       | 3081.411        | 505.448         |
| <i>PRKD2</i>    | 38269_at     | 3.2155E-14  | 2.07763E-09           | 8928.002                    | 4212.167                    | 10455.3         | 10991.62        |
| <i>STRBP</i>    | 229513_at    | 3.28451E-14 | 2.12222E-09           | 6189.39                     | 2488.921                    | 11781.82        | 3978.828        |
| <i>GNG11</i>    | 204115_at    | 3.90487E-14 | 2.52305E-09           | 5450.152                    | 516.149                     | 4304.874        | 325.9366        |
| <i>C5orf56</i>  | 232253_at    | 4.21282E-14 | 2.72203E-09           | 5554.729                    | 2239.954                    | 6606.38         | 5554.729        |
| <i>C5orf56</i>  | 1560128_x_at | 5.73176E-14 | 3.70346E-09           | 5868.1645                   | 2324.341                    | 6626.744        | 6057.896        |
| <i>HMG2</i>     | 1567224_at   | 6.32317E-14 | 4.08559E-09           | 710.02685                   | 159.936                     | 1640.716        | 719.3384        |
| <i>JAKMIP2</i>  | 205888_s_at  | 6.38624E-14 | 4.12634E-09           | 1292.324                    | 349.6975                    | 1317.631        | 1260.944        |
| <i>Fam129c</i>  | 230983_at    | 6.39087E-14 | 4.12933E-09           | 1726.65                     | 691.5782                    | 8700.398        | 603.9232        |
| <i>glcci1</i>   | 227525_at    | 7.24393E-14 | 4.68052E-09           | 8487.35                     | 3210.8                      | 9412.415        | 18957.62        |
| <i>SETBP1</i>   | 240925_at    | 7.34119E-14 | 4.74337E-09           | 716.62415                   | 287.6634                    | 610.3551        | 770.1945        |
| <i>SMAD1</i>    | 220450_at    | 7.97055E-14 | 5.15001E-09           | 883.8603                    | 307.1                       | 687.6315        | 718.6006        |
| <i>EVL</i>      | 217838_s_at  | 1.10876E-13 | 7.164E-09             | 7760.5945                   | 3090.8                      | 5964.92         | 13007.14        |

|           |              |             |             |            |          |          |          |
|-----------|--------------|-------------|-------------|------------|----------|----------|----------|
| MLLT3     | 1569652_at   | 1.21714E-13 | 7.86428E-09 | 3138.6405  | 843.0154 | 2040.222 | 4957.047 |
| EVL       | 227232_at    | 1.26602E-13 | 8.18013E-09 | 3367.124   | 1633.041 | 4060.811 | 5921.8   |
| SIPA1L1   | 202254_at    | 1.33072E-13 | 8.59818E-09 | 869.7167   | 464.6155 | 1030.668 | 2209.755 |
| CHRDL1    | 209763_at    | 1.43907E-13 | 9.29827E-09 | 2634.323   | 308.2934 | 9688.823 | 1252.413 |
| TNFRSF21  | 218856_at    | 1.6657E-13  | 1.07626E-08 | 4831.343   | 1019.712 | 5031.771 | 1907.734 |
| BCL11A    | 210347_s_at  | 2.84136E-13 | 1.83589E-08 | 8127.6865  | 4225.916 | 11401.96 | 4188.416 |
| IRF7      | 208436_s_at  | 3.33078E-13 | 2.15211E-08 | 6510.19    | 3371.827 | 12050.77 | 4476.307 |
| Akt3      | 240568_at    | 3.50687E-13 | 2.2659E-08  | 1234.281   | 270.1    | 1071.31  | 1304.587 |
| OSBPL3    | 209627_s_at  | 4.05881E-13 | 2.62252E-08 | 5276.254   | 1941.5   | 3259.768 | 10970.45 |
| Fam171b   | 227370_at    | 5.18979E-13 | 3.35328E-08 | 1675.359   | 273.1929 | 1672.61  | 1675.359 |
| Rbpms     | 209487_at    | 5.92617E-13 | 3.82908E-08 | 7247.6305  | 525.6    | 8029.771 | 4591.314 |
| TNFRSF21  | 214581_x_at  | 7.21067E-13 | 4.65903E-08 | 1287.667   | 383.3771 | 2474.975 | 669.1055 |
| Gna12     | 242514_at    | 7.41439E-13 | 4.79066E-08 | 1763.471   | 847.3047 | 2175.619 | 1250.13  |
| SLC37A3   | 1569666_s_at | 1.17133E-12 | 7.56834E-08 | 1100.764   | 378.1601 | 1083.324 | 1358.657 |
| DLG3      | 212727_at    | 1.24199E-12 | 8.02487E-08 | 633.1099   | 206.1426 | 885.2161 | 1028.006 |
| MLLT3     | 204918_s_at  | 1.75719E-12 | 1.13537E-07 | 2065.1115  | 616.8    | 1529.861 | 2574.109 |
| Gna12     | 221737_at    | 1.91537E-12 | 1.23758E-07 | 1970.917   | 1183.866 | 2848.716 | 1440.945 |
| C18orf8   | 221190_s_at  | 2.14E-12    | 1.38272E-07 | 4630.662   | 3323.6   | 4419.657 | 4254.427 |
| Spib      | 205861_at    | 2.19187E-12 | 1.41624E-07 | 906.8437   | 461.0276 | 5570.792 | 251.3916 |
| glcc1     | 225706_at    | 2.41662E-12 | 1.56145E-07 | 9891.75    | 3597.131 | 11172.64 | 17815.2  |
| MLLT3     | 204917_s_at  | 2.50358E-12 | 1.61764E-07 | 2632.048   | 765.6987 | 2318.845 | 4508.693 |
| Rbpms     | 241897_at    | 3.04562E-12 | 1.96786E-07 | 4406.825   | 497.7664 | 4454.44  | 4406.825 |
| KIAA0125  | 206478_at    | 3.64503E-12 | 2.35516E-07 | 31420.105  | 5396.3   | 21607.8  | 17629.57 |
| SYNE1     | 209447_at    | 3.87331E-12 | 2.50266E-07 | 3488.298   | 1499.5   | 2965.431 | 3488.298 |
| SPON1     | 213994_s_at  | 3.96227E-12 | 2.56014E-07 | 1043.33305 | 119.4    | 2022.867 | 209.3076 |
| Ldoc1     | 204454_at    | 5.59577E-12 | 3.61559E-07 | 1677.748   | 371      | 2030.208 | 1513.264 |
| FUCA2     | 223120_at    | 5.71298E-12 | 3.69133E-07 | 1109.817   | 2651.091 | 1497.318 | 592.6191 |
| PPP1R16B  | 1563473_at   | 6.08159E-12 | 3.9295E-07  | 7815.017   | 1882.5   | 3690.969 | 4187.259 |
| LRRN2     | 205154_at    | 6.61616E-12 | 4.2749E-07  | 676.1514   | 113.216  | 1134.014 | 865.1028 |
| gng7      | 228831_s_at  | 6.86266E-12 | 4.43417E-07 | 4558.129   | 1755.39  | 7958.043 | 5992.932 |
| Spib      | 232739_at    | 6.89927E-12 | 4.45782E-07 | 356.8595   | 187.7863 | 1320.554 | 119.8602 |
| SMAD1     | 208015_at    | 9.39678E-12 | 6.07154E-07 | 1171.664   | 610      | 1359.004 | 1171.664 |
| cobl      | 1552496_a_at | 9.52614E-12 | 6.15513E-07 | 97.85473   | 17.1     | 897.6827 | 14.50244 |
| C5orf23   | 219054_at    | 1.02495E-11 | 6.62254E-07 | 21458.95   | 4323.1   | 7858.883 | 24553.15 |
| TCF4      | 244480_at    | 1.09282E-11 | 7.06107E-07 | 726.2126   | 280.2284 | 747.192  | 397.8195 |
| MTMR1     | 216095_x_at  | 1.21316E-11 | 7.83857E-07 | 6431.6535  | 4475.114 | 6562.836 | 5770.119 |
| GZMB      | 210164_at    | 1.26398E-11 | 8.16695E-07 | 4245.4775  | 1070.149 | 7271.232 | 1057.192 |
| Rbpms     | 209488_s_at  | 1.3943E-11  | 9.00897E-07 | 3991.758   | 401.6    | 4316.202 | 2637.906 |
| TTC28     | 213058_at    | 1.398E-11   | 9.03291E-07 | 2933.291   | 1318.024 | 6504.276 | 1487.023 |
| ARPC5L    | 226914_at    | 1.47274E-11 | 9.51582E-07 | 4023.55    | 2468.503 | 4192.137 | 3458.58  |
| WWTR1     | 202133_at    | 1.52969E-11 | 9.88379E-07 | 369.1271   | 85.1     | 925.5596 | 2520.237 |
| SPTBN1    | 212071_s_at  | 1.57723E-11 | 1.0191E-06  | 27150.305  | 11463.26 | 27837.06 | 35633.43 |
| OPTN      | 202073_at    | 1.68588E-11 | 1.0893E-06  | 2733.34    | 658.4    | 2515.973 | 3330.893 |
| tpm2      | 229911_at    | 1.85516E-11 | 1.19867E-06 | 146.21365  | 68.0223  | 232.8234 | 114.4999 |
| C10orf10  | 209183_s_at  | 1.92761E-11 | 1.24549E-06 | 1519.5915  | 572.9    | 2396.272 | 1455.024 |
| RIMKLB    | 229344_x_at  | 2.03238E-11 | 1.31318E-06 | 6128.6745  | 3342.1   | 4320.784 | 11520.52 |
| Rbpms     | 207837_at    | 2.59259E-11 | 1.67515E-06 | 454.4621   | 142.8    | 251.4723 | 454.4621 |
| tab2      | 212184_s_at  | 2.62839E-11 | 1.69828E-06 | 8899.9165  | 5740.426 | 5475.058 | 8820.133 |
| CLEC4C    | 1552552_s_at | 2.7985E-11  | 1.8082E-06  | 344.73655  | 174.8    | 1384.915 | 5.10475  |
| Tcf7l2    | 216035_x_at  | 2.85598E-11 | 1.84533E-06 | 5456.423   | 2581.244 | 6009.965 | 5456.423 |
| BAALC     | 218899_s_at  | 2.87457E-11 | 1.85735E-06 | 10481.0215 | 1042.5   | 13727.18 | 3064.515 |
| MST1R     | 205455_at    | 2.91165E-11 | 1.88131E-06 | 491.8137   | 234.6312 | 743.7767 | 401.8979 |
| tab2      | 1565889_at   | 2.99312E-11 | 1.93395E-06 | 2506.7835  | 1345.2   | 2608.327 | 2475.667 |
| SH3BP4    | 222258_s_at  | 2.99634E-11 | 1.93602E-06 | 1929.6105  | 365.4827 | 2586.482 | 2532.917 |
| LILRA4    | 210313_at    | 3.42701E-11 | 2.21429E-06 | 429.4768   | 264.3541 | 1712.929 | 79.90863 |
| TNRC6B    | 1558142_at   | 4.16506E-11 | 2.69117E-06 | 12049.81   | 7465     | 9969.724 | 12049.81 |
| Bach2     | 221234_s_at  | 4.627E-11   | 2.98964E-06 | 1576.895   | 496.16   | 5336.834 | 2058.531 |
| MTMR1     | 213511_s_at  | 4.67901E-11 | 3.02325E-06 | 5837.9965  | 4180.06  | 6396.524 | 4689.628 |
| ephb1     | 230425_at    | 4.72542E-11 | 3.05323E-06 | 197.0411   | 64.58678 | 1000.887 | 197.0411 |
| GBP4      | 235574_at    | 5.59026E-11 | 3.61203E-06 | 1268.194   | 397.8    | 725.3029 | 999.0574 |
| BAALC     | 222780_s_at  | 5.80797E-11 | 3.7527E-06  | 8483.259   | 821.0243 | 11264.08 | 1825.544 |
| Tcf7l2    | 236094_at    | 6.282E-11   | 4.05899E-06 | 2258.102   | 789.5847 | 1524.44  | 3737.96  |
| LOC283270 | 1556319_at   | 6.79498E-11 | 4.39044E-06 | 996.32955  | 646.7    | 836.4403 | 1151.355 |
| ETS1      | 224833_at    | 6.8177E-11  | 4.40512E-06 | 15471.56   | 5383.046 | 14295.76 | 15798.81 |
| PPM1J     | 229484_at    | 7.1551E-11  | 4.62313E-06 | 355.6619   | 161.1    | 420.9165 | 383.6357 |
| pAG1      | 227354_at    | 7.3525E-11  | 4.75067E-06 | 6334.78    | 2971.9   | 9214.386 | 4518.123 |
| LOC143286 | 1565644_at   | 7.78171E-11 | 5.028E-06   | 451.4683   | 214.7775 | 522.2742 | 461.7799 |
| KIAA1462  | 231842_at    | 8.6628E-11  | 5.59729E-06 | 465.04065  | 97.2     | 1968.543 | 477.6249 |
| foxo1     | 202723_s_at  | 8.72126E-11 | 5.63507E-06 | 1156.1995  | 346.5862 | 1915.93  | 1552.216 |
| C13orf18  | 219471_at    | 8.86952E-11 | 5.73086E-06 | 1631.7015  | 798.436  | 8333.64  | 348.2334 |
| CCDC50    | 228693_at    | 1.0036E-10  | 6.48456E-06 | 560.2482   | 462.8344 | 1994.267 | 488.1964 |
| TSPYL2    | 218012_at    | 1.08456E-10 | 7.0077E-06  | 2510.6785  | 1286.149 | 2426.36  | 1473.199 |



|                  |              |             |             |           |          |          |          |
|------------------|--------------|-------------|-------------|-----------|----------|----------|----------|
| <i>Npas3</i>     | 244172_at    | 1.10695E-10 | 7.15232E-06 | 2089.18   | 608      | 8758.05  | 168.0745 |
| <i>ZC3H12C</i>   | 231899_at    | 1.15852E-10 | 7.48555E-06 | 5686.794  | 1879.397 | 3858.829 | 6338.455 |
| <i>HLF</i>       | 204754_at    | 1.16473E-10 | 7.5257E-06  | 317.6431  | 47.5     | 87.7184  | 1921.332 |
| <i>CCDC50</i>    | 226713_at    | 1.18994E-10 | 7.68858E-06 | 677.3531  | 591.1756 | 2364.537 | 676.4057 |
| <i>TNRC6B</i>    | 230779_at    | 1.22789E-10 | 7.93379E-06 | 5338.5485 | 3199.959 | 3271.065 | 6271.468 |
| <i>pAG1</i>      | 225626_at    | 1.43748E-10 | 9.28801E-06 | 10320.66  | 4610.2   | 11619.13 | 6890.248 |
| <i>OSBPL3</i>    | 209626_s_at  | 1.47313E-10 | 9.51832E-06 | 3637.05   | 1587.4   | 1815.268 | 7124.554 |
| <i>COBLL1</i>    | 243039_at    | 1.4929E-10  | 9.6461E-06  | 1548.735  | 537.1899 | 1637.481 | 388.873  |
| <i>KIAA1466</i>  | 222139_at    | 1.50627E-10 | 9.73248E-06 | 1381.5    | 664.8577 | 516.785  | 773.6312 |
| <i>SLC38A1</i>   | 218237_s_at  | 1.5247E-10  | 9.85156E-06 | 22265.22  | 8730.7   | 17226.23 | 15348.17 |
| <i>MAML2</i>     | 235457_at    | 1.71708E-10 | 1.10946E-05 | 3090.306  | 1364.953 | 5029.091 | 2627.015 |
| <i>CYTH4</i>     | 219183_s_at  | 1.89391E-10 | 1.22371E-05 | 7308.8125 | 3047.2   | 8996.578 | 4341.903 |
| <i>SLC38A1</i>   | 224579_at    | 1.90644E-10 | 1.23181E-05 | 28156.57  | 11604.44 | 24447.13 | 18974.74 |
| <i>ISG20</i>     | 204698_at    | 1.92274E-10 | 1.24234E-05 | 4647.6485 | 929.5    | 3537.32  | 1533.713 |
| <i>JAKMIP2</i>   | 237100_at    | 1.93553E-10 | 1.2500E-05  | 701.1402  | 321.5949 | 649.2233 | 519.4354 |
| <i>NPR3</i>      | 219789_at    | 2.1026E-10  | 1.35855E-05 | 11547.91  | 2511.5   | 3918.858 | 13887.26 |
| <i>FLNB</i>      | 208614_s_at  | 2.21416E-10 | 1.43063E-05 | 6746.129  | 2097.1   | 7060.003 | 3705.847 |
| <i>SLC25A30</i>  | 226782_at    | 2.34646E-10 | 1.51612E-05 | 4482.8495 | 2826.067 | 4394.19  | 3227.096 |
| <i>SMAD1</i>     | 210993_s_at  | 2.3639E-10  | 1.52739E-05 | 5351.945  | 2652.45  | 4798.79  | 4485.935 |
| <i>herc6</i>     | 239988_at    | 2.4046E-10  | 1.55368E-05 | 1089.6088 | 464.3    | 365.9442 | 1432.338 |
| <i>BLNK</i>      | 207655_s_at  | 2.44476E-10 | 1.57963E-05 | 10462.04  | 1650.9   | 32896.01 | 165.1732 |
| <i>TCF4</i>      | 240321_at    | 2.57009E-10 | 1.66061E-05 | 1326.2    | 448.8319 | 2067.14  | 608.581  |
| <i>MAN1A1</i>    | 237849_at    | 2.63133E-10 | 1.70018E-05 | 8181.719  | 3059.826 | 7255.403 | 8181.719 |
| <i>DLGAP2</i>    | 210227_at    | 2.84071E-10 | 1.83547E-05 | 352.8177  | 99.1     | 857.6971 | 145.697  |
| <i>SMAD1</i>     | 227798_at    | 2.92918E-10 | 1.89263E-05 | 8068.639  | 3547.199 | 7616.84  | 6763.596 |
| <i>notch1</i>    | 218902_at    | 2.99757E-10 | 1.93682E-05 | 5043.409  | 2919.3   | 5822.072 | 5043.409 |
| <i>FMNL3</i>     | 227844_at    | 2.99919E-10 | 1.93786E-05 | 938.34805 | 443.4    | 765.4563 | 1206.647 |
| <i>Tcf7l2</i>    | 212762_s_at  | 3.39252E-10 | 2.19201E-05 | 6960.8255 | 2205.6   | 6873.651 | 7211.316 |
| <i>Hs3st1</i>    | 205466_s_at  | 3.42678E-10 | 2.21415E-05 | 741.5148  | 115.6852 | 2583.639 | 89.80471 |
| <i>Fam129c</i>   | 1553369_at   | 3.65853E-10 | 2.36389E-05 | 275.521   | 69       | 956.4264 | 22.35111 |
| <i>SPANXA1</i>   | 220922_s_at  | 4.23418E-10 | 2.73583E-05 | 123       | 39.07784 | 908.9677 | 38.44744 |
| <i>Tcf7l2</i>    | 216037_x_at  | 4.26598E-10 | 2.75638E-05 | 4211.469  | 2422.07  | 5353.547 | 4211.469 |
| <i>glcc1</i>     | 225700_at    | 4.29626E-10 | 2.77594E-05 | 1119.75   | 532.1161 | 1154.477 | 1352.177 |
| <i>SAPS2</i>     | 202792_s_at  | 4.38912E-10 | 2.83595E-05 | 1922.392  | 1175.064 | 1658.525 | 2683.064 |
| <i>RERE</i>      | 200940_s_at  | 4.53923E-10 | 2.93293E-05 | 6599.678  | 4318.995 | 5306.753 | 8592.482 |
| <i>C13orf18</i>  | 44790_s_at   | 4.68244E-10 | 3.02546E-05 | 1864.9515 | 632.5472 | 12336.2  | 16.76657 |
| <i>JAKMIP2</i>   | 205889_s_at  | 4.80471E-10 | 3.10446E-05 | 801.7969  | 178.3299 | 1263.666 | 801.7969 |
| <i>SPON1</i>     | 209436_at    | 5.24171E-10 | 3.38683E-05 | 2647.7735 | 457.7826 | 3799.835 | 442.0873 |
| <i>CLEC4C</i>    | 1555687_a_at | 5.26969E-10 | 3.40491E-05 | 118.16405 | 105.3121 | 878.1563 | 12.67028 |
| <i>PRKCB</i>     | 227817_at    | 5.56072E-10 | 3.59295E-05 | 8531.035  | 5065.3   | 7550.813 | 7356.734 |
| <i>stk24</i>     | 1557316_at   | 5.68562E-10 | 3.67365E-05 | 1344.892  | 719.6    | 1388.263 | 2211.252 |
| <i>PTK2</i>      | 241387_at    | 5.81338E-10 | 3.7562E-05  | 1273.0375 | 344.9088 | 2431.42  | 172.8458 |
| <i>Tcf7l2</i>    | 232465_at    | 5.98889E-10 | 3.8696E-05  | 1472.692  | 666.2    | 1382.776 | 2247.946 |
| <i>ZNF154</i>    | 217242_at    | 6.00535E-10 | 3.88024E-05 | 458.9955  | 162.3782 | 218.2753 | 483.7473 |
| <i>SPON1</i>     | 213993_at    | 6.11315E-10 | 3.94989E-05 | 528.51255 | 56.4     | 808.9249 | 178.7689 |
| <i>npc1</i>      | 202679_at    | 6.11548E-10 | 3.9514E-05  | 2660.296  | 1701.053 | 3355.202 | 1884.545 |
| <i>UGCG</i>      | 224967_at    | 6.27997E-10 | 4.05768E-05 | 4461.628  | 3222.763 | 17111.46 | 3730.279 |
| <i>IL16</i>      | 209827_s_at  | 6.38587E-10 | 4.1261E-05  | 6628.0275 | 4158.8   | 5069.886 | 4845.077 |
| <i>SNED1</i>     | 213493_at    | 6.43224E-10 | 4.15606E-05 | 265.54965 | 53.2     | 207.3484 | 1584.421 |
| <i>STRBP</i>     | 233252_s_at  | 7.05178E-10 | 4.55637E-05 | 3509.833  | 1888.803 | 5830.926 | 3079.685 |
| <i>LOC728743</i> | 225909_at    | 7.05837E-10 | 4.56062E-05 | 1387.061  | 859.8779 | 1838.952 | 1438.163 |
| <i>YPEL1</i>     | 228788_at    | 7.23985E-10 | 4.67789E-05 | 2774.6355 | 1038.44  | 2248.417 | 3445.187 |
| <i>GBP2</i>      | 242907_at    | 9.64461E-10 | 6.23167E-05 | 4525.334  | 1901.1   | 1652.754 | 4252.522 |
| <i>DGKE</i>      | 238457_at    | 1.01639E-09 | 6.56721E-05 | 1299.674  | 639.6445 | 753.1713 | 3769.956 |
| <i>TAP2</i>      | 225973_at    | 1.03698E-09 | 6.70024E-05 | 6405.664  | 4041     | 6970.757 | 6800.362 |
| <i>tlr9</i>      | 223903_at    | 1.13205E-09 | 7.31449E-05 | 598.91595 | 537.5    | 1357.773 | 477.9331 |
| <i>PPP3CC</i>    | 32541_at     | 1.15279E-09 | 7.44851E-05 | 2062.559  | 1258.648 | 2079.25  | 1663.873 |
| <i>PCDHGA1</i>   | 211066_x_at  | 1.20403E-09 | 7.77957E-05 | 2339.403  | 1189.216 | 9116.334 | 4427.388 |
| <i>DTX3</i>      | 235721_at    | 1.29746E-09 | 8.38325E-05 | 944.5634  | 264.03   | 878.0258 | 7043.124 |
| <i>Tcf7l2</i>    | 216511_s_at  | 1.32309E-09 | 8.5489E-05  | 4642.97   | 2022.1   | 5152.487 | 4133.453 |
| <i>PPP3CC</i>    | 207000_s_at  | 1.40585E-09 | 9.08363E-05 | 2167.3755 | 1332.8   | 2436.336 | 1680.415 |
| <i>PCDHGA1</i>   | 205717_x_at  | 1.42858E-09 | 9.23051E-05 | 1399.343  | 830.7214 | 6302.753 | 2874.51  |
| <i>PTK2</i>      | 239121_at    | 1.47687E-09 | 9.54248E-05 | 587.9573  | 233.2676 | 1302.044 | 147.2663 |
| <i>UGCG</i>      | 204881_s_at  | 1.61741E-09 | 0.000104506 | 3926.305  | 3490.1   | 13105.25 | 3926.305 |
| <i>CARD11</i>    | 223514_at    | 1.82104E-09 | 0.000117663 | 1217.7715 | 323.9    | 1577.679 | 1207.668 |
| <i>Rab11fip4</i> | 224482_s_at  | 1.87562E-09 | 0.000121119 | 538.829   | 193.4415 | 482.758  | 965.3473 |
| <i>Ptprs</i>     | 226571_s_at  | 2.00671E-09 | 0.00012966  | 592.7755  | 234.6327 | 900.7805 | 642.3398 |
| <i>STRBP</i>     | 233251_at    | 2.12914E-09 | 0.00013757  | 1425.5925 | 722.979  | 2434.996 | 1271.156 |
| <i>PPP1R16B</i>  | 233813_at    | 2.26891E-09 | 0.000146601 | 963.25945 | 357      | 613.5356 | 481.37   |
| <i>Gna12</i>     | 224681_at    | 2.28655E-09 | 0.000147741 | 6800.061  | 3289.5   | 9028.1   | 3439.561 |
| <i>nog</i>       | 231798_at    | 2.43684E-09 | 0.000157452 | 3885.992  | 1227.4   | 5280.872 | 18968.48 |
| <i>FLJ46446</i>  | 1556402_at   | 2.52482E-09 | 0.000163136 | 1016.505  | 217.8654 | 1072.989 | 6341.12  |

|              |              |             |             |           |          |          |          |
|--------------|--------------|-------------|-------------|-----------|----------|----------|----------|
| HAR1A        | 1557098_s_at | 2.62856E-09 | 0.000169839 | 247.6632  | 55.2     | 652.4979 | 736.4958 |
| ephb1        | 210753_s_at  | 2.84766E-09 | 0.000183996 | 274.96545 | 126.479  | 777.2672 | 164.0359 |
| SNRPN        | 228370_at    | 2.86703E-09 | 0.000185247 | 3754.485  | 1581.8   | 2919.482 | 2852.273 |
| TNFSF4       | 207426_s_at  | 2.87787E-09 | 0.000185948 | 5489.492  | 2244.314 | 2883.97  | 4669.874 |
| CARD11       | 1562368_at   | 3.07477E-09 | 0.000198667 | 411.45955 | 221.5947 | 409.0917 | 362.9363 |
| SEP9         | 208657_s_at  | 3.16772E-09 | 0.000204676 | 2036.556  | 1163.845 | 1510.526 | 1915.012 |
| ST3GAL1      | 225033_at    | 3.20888E-09 | 0.000207335 | 5058.5515 | 2683.2   | 3273.744 | 4895.003 |
| C21orf96     | 220918_at    | 3.28412E-09 | 0.000212197 | 15187.38  | 7581.835 | 9827.533 | 15187.38 |
| Rcsd1        | 239328_at    | 3.31696E-09 | 0.000214319 | 7061.184  | 3253.205 | 3855.016 | 9761.096 |
| Arl4c        | 202206_at    | 3.46788E-09 | 0.00022407  | 2796.847  | 1179.05  | 2405.501 | 2983.671 |
| PCDHGA1      | 209079_x_at  | 3.61634E-09 | 0.000233663 | 1959.015  | 876.1    | 7894.268 | 2601.552 |
| AJAP1        | 215790_at    | 3.7598E-09  | 0.000242932 | 13.964925 | 14.88708 | 9.80116  | 463.8555 |
| STMN3        | 222557_at    | 3.8609E-09  | 0.000249464 | 5910.447  | 3362.6   | 5596.837 | 6377.118 |
| SELL         | 204563_at    | 3.92629E-09 | 0.000253689 | 67493.405 | 29491.9  | 47254.13 | 80061.28 |
| plxnc1       | 240638_at    | 4.2934E-09  | 0.000277409 | 1030.4    | 464.9635 | 1497.612 | 1124.204 |
| runx3        | 204198_s_at  | 4.9648E-09  | 0.00032079  | 6106.3405 | 2610.9   | 6068.181 | 8170.055 |
| psmb9        | 204279_at    | 5.09592E-09 | 0.000329262 | 12598.49  | 7136.5   | 14236.63 | 11457.36 |
| Ncr1         | 207860_at    | 5.16833E-09 | 0.000333942 | 406.5276  | 184      | 359.1696 | 960.256  |
| SNED1        | 235743_at    | 5.27097E-09 | 0.000340573 | 228.0999  | 78.4     | 124.8144 | 1083.206 |
| Fam129c      | 1569422_at   | 5.54157E-09 | 0.000358058 | 461.41575 | 244.7513 | 1833.996 | 302.6234 |
| GPRASP1      | 204793_at    | 5.57294E-09 | 0.000360084 | 1754.49   | 910.5    | 1653.639 | 5070.933 |
| Cdh9         | 207729_at    | 5.6255E-09  | 0.00036348  | 363.3126  | 70.99381 | 736.7101 | 12213.79 |
| gng7         | 1566643_a_at | 6.10121E-09 | 0.000394218 | 772.6728  | 259.4579 | 1083.681 | 1358.43  |
| SLC44A3      | 228221_at    | 6.13854E-09 | 0.00039663  | 207.28055 | 74.2     | 72.96017 | 2090.801 |
| FLNB         | 1562416_at   | 6.70217E-09 | 0.000433047 | 1462.9505 | 659.3    | 1433.831 | 873.6851 |
| FAR2         | 1557410_at   | 6.76891E-09 | 0.00043736  | 1753.4765 | 533.8    | 650.8967 | 5215.187 |
| Ly9          | 210370_s_at  | 6.83071E-09 | 0.000441353 | 1146.401  | 403.7163 | 1983.496 | 222.0607 |
| EVL          | 244375_at    | 6.95522E-09 | 0.000449397 | 1062.7915 | 478.9    | 1226.044 | 1870.081 |
| IL28RA       | 244261_at    | 6.99268E-09 | 0.000451818 | 226.1215  | 90.24981 | 2425.2   | 7.57878  |
| PTK2         | 1559529_at   | 7.06269E-09 | 0.000456342 | 731.7214  | 237.3531 | 3025.385 | 216.8663 |
| RIMKLB       | 226164_x_at  | 7.53031E-09 | 0.000486556 | 3272.7815 | 1831.017 | 2459.501 | 5562.734 |
| CAND2        | 213547_at    | 8.36471E-09 | 0.000540469 | 790.3     | 343.7015 | 1203.958 | 1333.698 |
| Arl4c        | 202207_at    | 8.5097E-09  | 0.000549837 | 5809.026  | 2311.823 | 4182.288 | 5762.869 |
| PTK2         | 208820_at    | 8.84584E-09 | 0.000571556 | 3461.6955 | 477.1532 | 9579.42  | 416.4796 |
| stard10      | 223103_at    | 8.97737E-09 | 0.000580055 | 892.9255  | 399.9696 | 437.3618 | 1085.783 |
| LOC100240735 | 241803_s_at  | 8.98879E-09 | 0.000580793 | 2056.6195 | 837.8    | 2376.014 | 2607.728 |
| gats         | 1553971_a_at | 9.08929E-09 | 0.000587286 | 1440.8905 | 786.542  | 1527.347 | 1666.602 |
| Lsp1         | 203523_at    | 9.32586E-09 | 0.000602572 | 8456.7495 | 3652     | 8000.715 | 8847.199 |
| IQGAP2       | 241723_at    | 9.45972E-09 | 0.000611221 | 2073.813  | 931.2    | 1020.96  | 1394.703 |
| LPHN1        | 47560_at     | 9.64717E-09 | 0.000623332 | 1483.204  | 502.698  | 1504.007 | 1728.327 |
| RERE         | 244625_at    | 9.95974E-09 | 0.000643529 | 4463.261  | 2237.87  | 2516.815 | 4421.457 |
| SLC38A1      | 224580_at    | 1.04728E-08 | 0.000676678 | 2050.396  | 961.7859 | 2456.675 | 1633.346 |
| PROM1        | 204304_s_at  | 1.14323E-08 | 0.000738678 | 28476.615 | 9429.681 | 21518.42 | 26943.17 |
| Cobll1       | 203642_s_at  | 1.20093E-08 | 0.000775957 | 3194.563  | 745.6805 | 3548.579 | 669.7213 |
| PTK2         | 242240_at    | 1.25793E-08 | 0.000812787 | 704.6238  | 475.3807 | 1566.756 | 449.0546 |
| CD5          | 230489_at    | 1.28046E-08 | 0.000827343 | 1120.595  | 244.8644 | 279.5675 | 2783.418 |
| Zmiz1        | 212124_at    | 1.34788E-08 | 0.000870906 | 24086.19  | 15385.14 | 21124.32 | 34811.59 |
| KIAA1984     | 236518_at    | 1.36211E-08 | 0.000880103 | 940.3075  | 648.0353 | 1160.737 | 809.3305 |
| ISG20        | 33304_at     | 1.42063E-08 | 0.000917911 | 4347.3305 | 1520.592 | 3758.953 | 1870.734 |
| C12orf75     | 225105_at    | 1.44926E-08 | 0.00093641  | 5314.27   | 2171     | 6037.504 | 4591.036 |
| Cobll1       | 203641_s_at  | 1.52059E-08 | 0.0009825   | 766.84715 | 365.0693 | 1029.022 | 317.6997 |
| SLC2A5       | 204430_s_at  | 1.56006E-08 | 0.001008003 | 11372.125 | 5059.713 | 6990.166 | 4663.688 |
| Rbpms        | 231961_at    | 1.62192E-08 | 0.001047973 | 581.89715 | 258.7235 | 935.719  | 643.4675 |
| FLJ22536     | 236815_at    | 1.64949E-08 | 0.001065787 | 443.5828  | 124.8787 | 304.1255 | 995.4824 |
| Sec61a2      | 219499_at    | 1.65489E-08 | 0.001069276 | 1074.932  | 731.2    | 1137.097 | 976.0063 |
| GPR56        | 212070_at    | 1.65913E-08 | 0.001072012 | 9278.747  | 1912.147 | 3365.336 | 11734.83 |
| PRKCH        | 218764_at    | 1.67792E-08 | 0.001084157 | 6760.104  | 2419.4   | 5019.121 | 3047.163 |
| DLL1         | 224215_s_at  | 1.71074E-08 | 0.001105362 | 629.30955 | 131.8362 | 1429.684 | 447.3502 |
| PRKCB        | 207957_s_at  | 1.73383E-08 | 0.00112028  | 12649.81  | 8556.13  | 11301.34 | 10303.88 |
| TCF7         | 205255_x_at  | 1.73859E-08 | 0.001123353 | 15124.925 | 5376.924 | 7974.573 | 20162.1  |
| HLF          | 204755_x_at  | 1.76416E-08 | 0.001139877 | 314.8969  | 61.8     | 25.21548 | 2163.95  |
| CREBBP       | 228177_at    | 1.82199E-08 | 0.001177239 | 1606.85   | 1069.6   | 2477.062 | 1863.298 |
| dusp5        | 209457_at    | 1.85624E-08 | 0.001199375 | 1743.674  | 997.9    | 1790.584 | 926.7944 |
| PCDHGA1      | 215836_s_at  | 1.88147E-08 | 0.001215672 | 1891.3245 | 935.3807 | 5777.263 | 2116.617 |
| lpin1        | 212276_at    | 1.89232E-08 | 0.001222683 | 7537.8175 | 3887.396 | 6802.836 | 5544.579 |
| UBASH3B      | 244068_at    | 1.97525E-08 | 0.00127627  | 631.5942  | 347.2    | 796.2374 | 631.5942 |
| HEG1         | 213069_at    | 2.03255E-08 | 0.001313291 | 839.02015 | 350.7    | 1262.759 | 2857.488 |
| Pear1        | 228618_at    | 2.20064E-08 | 0.001421899 | 2197.5015 | 446.9233 | 1771.358 | 873.3049 |
| GSTA4        | 235405_at    | 2.34368E-08 | 0.001514321 | 623.52225 | 219.9    | 862.4214 | 1752.651 |
| GCOM1        | 228568_at    | 2.37357E-08 | 0.001533636 | 1070.7644 | 420.2128 | 1244.541 | 2913.765 |
| C1orf21      | 223125_s_at  | 2.40199E-08 | 0.001552    | 3349.587  | 1515.31  | 3303.674 | 3720.804 |
| STRBP        | 237195_at    | 2.40335E-08 | 0.001552878 | 1231.0875 | 667.5717 | 2603.402 | 1260.797 |

|              |              |             |             |            |          |          |          |
|--------------|--------------|-------------|-------------|------------|----------|----------|----------|
| SEP9         | 41220_at     | 2.50687E-08 | 0.001619761 | 31836.69   | 20505.5  | 30347.88 | 30322.6  |
| VAV3         | 218807_at    | 2.53544E-08 | 0.001638223 | 12775.1    | 6628.4   | 10496.65 | 7010.05  |
| SLC15A4      | 225057_at    | 2.80362E-08 | 0.001811502 | 4690.764   | 3141.235 | 5672.875 | 5146.461 |
| ANKRD6       | 204671_s_at  | 2.8348E-08  | 0.00183165  | 1606.187   | 646.3    | 1717.33  | 1928.239 |
| naa15        | 1556382_a_at | 2.99975E-08 | 0.001938226 | 1335.017   | 734.6522 | 1765.338 | 2778.404 |
| GNB5         | 211871_x_at  | 3.17091E-08 | 0.00204882  | 1306.7115  | 719.6268 | 1014.689 | 1245.634 |
| DGKE         | 238694_at    | 3.19523E-08 | 0.002064536 | 1829.283   | 997.8337 | 1159.743 | 8246.277 |
| Ly9          | 215967_s_at  | 3.33162E-08 | 0.002152656 | 1929.7255  | 602.5    | 2734.042 | 523.8878 |
| ANKRD13A     | 224810_s_at  | 3.39863E-08 | 0.002195959 | 17631.365  | 13851.99 | 20976.13 | 20638.24 |
| skap1        | 205790_at    | 3.44415E-08 | 0.002225367 | 1493.645   | 674.1    | 1257.801 | 1119.774 |
| C1orf21      | 223126_s_at  | 3.64297E-08 | 0.002353832 | 1107.785   | 503.856  | 1266.11  | 1105.017 |
| PDE4DIP      | 212390_at    | 3.98579E-08 | 0.002575339 | 1051.12185 | 678.3051 | 838.2938 | 777.4952 |
| tap1         | 202307_s_at  | 4.0676E-08  | 0.002628199 | 4893.417   | 3024.45  | 3890.291 | 8713.67  |
| stk24        | 215188_at    | 4.1008E-08  | 0.002649649 | 1088.04035 | 472.9818 | 1756.858 | 1243.467 |
| fam125a      | 1556643_at   | 4.10193E-08 | 0.002650379 | 2606.09    | 1549.496 | 2387.26  | 3243.243 |
| MEF2C        | 209200_at    | 4.41121E-08 | 0.002850218 | 9501.182   | 4820.192 | 9536.697 | 18952.34 |
| TFPI         | 215447_at    | 4.52487E-08 | 0.002923653 | 4553.2565  | 1808.585 | 1620.631 | 3976.708 |
| Tcf7l2       | 212761_at    | 4.71836E-08 | 0.003048676 | 16156.41   | 7678.092 | 17229.53 | 13796.08 |
| VAV3         | 218806_s_at  | 4.77733E-08 | 0.003086774 | 4366.126   | 2271.1   | 2847.239 | 2025.17  |
| PARP12       | 218543_s_at  | 4.89092E-08 | 0.003160172 | 5668.896   | 2705.376 | 5006.416 | 5668.896 |
| TMEM63A      | 228549_at    | 5.00491E-08 | 0.003233821 | 2544.75    | 1308     | 2666.528 | 1892.13  |
| Irf1         | 238725_at    | 5.23169E-08 | 0.003380349 | 5604.165   | 3850.448 | 8747.866 | 8737.503 |
| C9orf91      | 221865_at    | 5.2355E-08  | 0.003382812 | 2368.9505  | 1303.086 | 2566.03  | 1934.725 |
| CACNA2D2     | 229636_at    | 5.31885E-08 | 0.003436672 | 432.80335  | 86.3     | 742.5579 | 337.3527 |
| FLJ22536     | 229280_s_at  | 5.32051E-08 | 0.00343774  | 2031.316   | 540.0753 | 1048.093 | 5314.44  |
| PAN3         | 239393_at    | 5.37103E-08 | 0.003470381 | 8382.337   | 5683.247 | 11878.37 | 7552.801 |
| FLJ10489     | 1562433_at   | 5.61094E-08 | 0.003625395 | 2300.26    | 428.5277 | 2644.662 | 317.3395 |
| LRRN2        | 216167_at    | 5.61134E-08 | 0.003625654 | 209.9545   | 48.4     | 205.5258 | 418.7487 |
| FLJ43663     | 215330_at    | 5.68901E-08 | 0.00367584  | 2923.202   | 999.8376 | 860.345  | 2244.399 |
| HLF          | 204753_s_at  | 5.84426E-08 | 0.003776154 | 346.1246   | 72.7     | 32.48095 | 1945.349 |
| SPON1        | 209437_s_at  | 5.94403E-08 | 0.003840617 | 691.8448   | 266.2196 | 1013.159 | 164.0557 |
| ERN1         | 235745_at    | 6.61351E-08 | 0.004273187 | 1352.523   | 811.7681 | 844.5643 | 2313.497 |
| AMIGO2       | 222108_at    | 6.87704E-08 | 0.004434665 | 2008.522   | 497.9654 | 1083.429 | 805.6061 |
| SLC37A3      | 223304_at    | 6.99292E-08 | 0.004518337 | 974.888    | 378.9    | 1572.468 | 914.077  |
| Fam158a      | 1558938_at   | 7.04056E-08 | 0.004549117 | 1262.8025  | 971.3481 | 2315.274 | 2915.033 |
| PHF11        | 221816_s_at  | 7.153E-08   | 0.004621771 | 13285.48   | 9301.013 | 16900.53 | 14819.92 |
| SNED1        | 213488_at    | 7.24106E-08 | 0.004678663 | 434.1301   | 278.4666 | 423.8784 | 5365.883 |
| Lrch1        | 226795_at    | 7.33729E-08 | 0.004740844 | 2541.0865  | 1866.917 | 2567.973 | 3140.452 |
| runx3        | 204197_s_at  | 7.62712E-08 | 0.004928113 | 6287.232   | 2514.8   | 4184.854 | 6925.287 |
| dsp          | 200606_at    | 7.73685E-08 | 0.004999008 | 253.8687   | 112.039  | 122.7944 | 294.4374 |
| PLCL2        | 213309_at    | 7.87846E-08 | 0.005090507 | 6285.743   | 3809.2   | 5804.944 | 15489.82 |
| Sec61a2      | 228747_at    | 8.1416E-08  | 0.005260535 | 1466.987   | 900.8    | 1485.553 | 1278.418 |
| Crim1        | 233073_at    | 8.48219E-08 | 0.005480596 | 427.0772   | 223.8373 | 366.8815 | 276.1537 |
| Med13l       | 212207_at    | 9.18388E-08 | 0.00593398  | 4305.609   | 2928.616 | 5179.091 | 4007.263 |
| MYST3        | 226547_at    | 9.52293E-08 | 0.006153053 | 10385.445  | 7204.531 | 10402.09 | 14284.33 |
| UBASH3B      | 238587_at    | 9.91057E-08 | 0.006403518 | 3987.598   | 1814.5   | 7151.163 | 3054.906 |
| PAQR6        | 219236_at    | 9.98098E-08 | 0.006449013 | 820.95875  | 597.0081 | 625.5258 | 708.5505 |
| CXXC5        | 233955_x_at  | 9.9856E-08  | 0.006451997 | 19909.51   | 9243.5   | 21167.96 | 24594.5  |
| TNRC6B       | 240044_x_at  | 1.05124E-07 | 0.006792379 | 6161.5765  | 4177.101 | 5979.615 | 5919.146 |
| C5orf41      | 235556_at    | 1.06548E-07 | 0.006884379 | 3165.837   | 2146.2   | 2269.594 | 3165.837 |
| PTK2         | 242485_at    | 1.07366E-07 | 0.00693724  | 819.84945  | 292.5    | 1878.325 | 148.4933 |
| SP4          | 236265_at    | 1.07578E-07 | 0.006950921 | 5165.8865  | 3245.731 | 5159.573 | 4494.241 |
| LOC100131096 | 239062_at    | 1.0837E-07  | 0.00700211  | 836.5332   | 532.5914 | 742.7665 | 2092.512 |
| Prkce        | 216766_at    | 1.10636E-07 | 0.007148507 | 2372.7175  | 1343.206 | 3790.317 | 1971.684 |
| C6orf201     | 242739_at    | 1.12351E-07 | 0.007259365 | 1131.8435  | 689.8401 | 1181.74  | 1143.128 |
| DMRTC1       | 1553998_at   | 1.13588E-07 | 0.007339263 | 547.9939   | 258.6437 | 918.7449 | 498.3428 |
| PRIC285      | 232517_s_at  | 1.14441E-07 | 0.00739435  | 668.1588   | 380.9    | 848.9899 | 410.2219 |
| mfap4        | 212713_at    | 1.14833E-07 | 0.007419695 | 366.0533   | 57.9701  | 4816.192 | 366.0533 |
| AFF3         | 244696_at    | 1.15109E-07 | 0.007437511 | 3227.3195  | 1546.6   | 5695.445 | 1802.46  |
| Sbf2         | 233914_s_at  | 1.15272E-07 | 0.007448054 | 3110.2025  | 1827.686 | 4155.027 | 3124.418 |
| c19orf66     | 53720_at     | 1.1902E-07  | 0.007690207 | 3955.588   | 2499.338 | 3195.178 | 5818.677 |
| PYCR2        | 224855_at    | 1.20991E-07 | 0.007817564 | 2737.9535  | 1926.974 | 2502.32  | 2794.422 |
| Rcsd1        | 225763_at    | 1.21056E-07 | 0.007821798 | 15783.305  | 10138.4  | 12183.28 | 15366.06 |
| MAP3K14      | 205192_at    | 1.23923E-07 | 0.008007034 | 1283.99    | 742.0333 | 1427.448 | 1283.99  |
| Aradc2       | 226055_at    | 1.34744E-07 | 0.008706244 | 4417.363   | 2738.297 | 6034.053 | 4989.073 |
| TSPAN7       | 202242_at    | 1.37764E-07 | 0.008901344 | 3143.6845  | 423.556  | 6573.717 | 6657.558 |
| Rbpms        | 207836_s_at  | 1.38878E-07 | 0.008973309 | 2257.3575  | 375.1986 | 2244.621 | 1387.733 |
| DLG3         | 212728_at    | 1.45554E-07 | 0.009404676 | 570.44635  | 141.7106 | 596.6323 | 606.6147 |
| stk24        | 208855_s_at  | 1.47865E-07 | 0.009554022 | 30486.95   | 19505.2  | 41590.79 | 33942.58 |
| AFF3         | 1566880_at   | 1.49191E-07 | 0.009639653 | 923.0582   | 655.329  | 2664.979 | 682.1981 |
| LOC284551    | 1563802_at   | 1.49657E-07 | 0.009669762 | 453.4412   | 284.2    | 696.2508 | 263.2229 |
| C9orf142     | 226070_at    | 1.50849E-07 | 0.0097468   | 1489.0695  | 1095.656 | 1550.596 | 1537.431 |

|           |              |             |             |           |          |          |          |
|-----------|--------------|-------------|-------------|-----------|----------|----------|----------|
| ZNF496    | 1557616_at   | 1.55284E-07 | 0.010033351 | 758.9481  | 355.5    | 82.63664 | 913.9084 |
| YPEL1     | 213996_at    | 1.56791E-07 | 0.010130715 | 1970.305  | 916.297  | 1066.766 | 1970.305 |
| SPTBN1    | 226765_at    | 1.60625E-07 | 0.010378474 | 1610.692  | 753.4096 | 2114.65  | 3638.039 |
| PLCXD2    | 235230_at    | 1.60964E-07 | 0.01040039  | 1213.8595 | 623.5619 | 2364.764 | 1089.038 |
| STRBP     | 223246_s_at  | 1.67386E-07 | 0.010815342 | 1629.05   | 999.3    | 2693.449 | 1501.376 |
| gnl1      | 228857_at    | 1.72305E-07 | 0.011133128 | 1184.974  | 676.3943 | 1440.769 | 1964.974 |
| TMEM63A   | 214833_at    | 1.73034E-07 | 0.011180274 | 2862.9085 | 1483.659 | 2119.576 | 3355.57  |
| GBP2      | 202748_at    | 1.78948E-07 | 0.011562382 | 4571.076  | 3478.531 | 3483.26  | 4571.076 |
| Sh2d3c    | 1552667_a_at | 1.79218E-07 | 0.011579817 | 2483.683  | 1408.373 | 2774.904 | 2565.575 |
| GIMAP2    | 232024_at    | 1.79265E-07 | 0.011582848 | 13678.185 | 8402.7   | 12482.36 | 14874.01 |
| CCDC50    | 235051_at    | 1.80023E-07 | 0.011631846 | 232.2935  | 282.8    | 1371.201 | 18.16394 |
| AFF3      | 232286_at    | 1.8599E-07  | 0.012017395 | 3431.919  | 2084.6   | 7760.057 | 3397.628 |
| L3mbtl4   | 228557_at    | 1.90994E-07 | 0.012340683 | 927.0143  | 225.5434 | 711.7726 | 1135.77  |
| STAMBPL1  | 231891_at    | 1.92423E-07 | 0.012433056 | 431.10055 | 222.1116 | 367.2011 | 66.47868 |
| DLK1      | 209560_s_at  | 1.96055E-07 | 0.012667725 | 391.80285 | 194.8472 | 154.5353 | 76735.45 |
| C1orf55   | 244103_at    | 1.97341E-07 | 0.012750782 | 14586.62  | 9350.4   | 13379.25 | 11385.26 |
| DAPK1     | 239162_at    | 2.00578E-07 | 0.012959957 | 4766.531  | 2307.405 | 4422.627 | 4766.531 |
| NSUN3     | 1564248_at   | 2.11591E-07 | 0.013671547 | 1419.8795 | 746.6    | 721.1292 | 1631.871 |
| LYSMD2    | 226748_at    | 2.12524E-07 | 0.013731789 | 17073.525 | 12135.1  | 14793.92 | 17012.25 |
| ZNF530    | 232228_at    | 2.1878E-07  | 0.014136047 | 492.4497  | 317.0514 | 589.6146 | 734.4698 |
| OPTN      | 202074_s_at  | 2.19351E-07 | 0.014172917 | 4021.886  | 882.7687 | 2311.664 | 4329.157 |
| Kcnk10    | 220727_at    | 2.19999E-07 | 0.014214822 | 352.2769  | 186.9956 | 715.812  | 41.18683 |
| STAR9     | 227108_at    | 2.2001E-07  | 0.014215522 | 1331.9155 | 609.5635 | 1281.838 | 1171.965 |
| PLCG1     | 202789_at    | 2.20586E-07 | 0.014252718 | 2124.791  | 824.7    | 2873.279 | 1103.61  |
| f2r1      | 213506_at    | 2.20852E-07 | 0.014269914 | 5141.893  | 720.4365 | 4161.759 | 7913.146 |
| Tox       | 204529_s_at  | 2.22045E-07 | 0.014347011 | 6390.938  | 2595.416 | 4841.873 | 6390.938 |
| KLHL6     | 1560396_at   | 2.23212E-07 | 0.0144224   | 5089.7475 | 2802.3   | 3668.247 | 4989.954 |
| Sh2d1a    | 210116_at    | 2.2483E-07  | 0.014526964 | 3118.7465 | 1084.591 | 857.2443 | 7787.659 |
| Itbp3     | 227308_x_at  | 2.2639E-07  | 0.014627719 | 1414.8335 | 737.2755 | 952.2715 | 1403.648 |
| rab40b    | 204547_at    | 2.26435E-07 | 0.014630641 | 1652.6675 | 865.7269 | 2785.824 | 3732.944 |
| SCN3A     | 210432_s_at  | 2.39092E-07 | 0.015448482 | 4044.465  | 74.1     | 5050.752 | 755.9534 |
| LOC730102 | 241607_at    | 2.39582E-07 | 0.015480088 | 254.0298  | 770.3235 | 173.1736 | 259.853  |
| C12orf23  | 224759_s_at  | 2.46648E-07 | 0.015936674 | 6873.152  | 3793.8   | 7591.22  | 4953.094 |
| TMEM204   | 219315_s_at  | 2.53561E-07 | 0.016383336 | 2049.3065 | 660.4689 | 1677.133 | 2411.564 |
| Prpf40a   | 226687_at    | 2.53902E-07 | 0.016405352 | 3482.932  | 2738.1   | 4456.699 | 4246.32  |
| INHBA     | 210511_s_at  | 2.5981E-07  | 0.016787072 | 142.4702  | 49.8     | 13.99243 | 142.4702 |
| Cd6       | 1566448_at   | 2.62407E-07 | 0.016954881 | 549.0609  | 179.8033 | 82.24481 | 2450.134 |
| CXXC5     | 222996_at    | 2.63654E-07 | 0.017035451 | 12055.65  | 5307.53  | 15596.1  | 13565.65 |
| KLHL3     | 221221_s_at  | 2.64707E-07 | 0.017103519 | 1483.628  | 827.3987 | 1866.369 | 2650.954 |
| PTK2      | 207821_s_at  | 2.6849E-07  | 0.017347943 | 1425.262  | 499.4    | 3397.166 | 240.5396 |
| fam168a   | 36612_at     | 2.75416E-07 | 0.017795428 | 1908.026  | 1360.162 | 2577.026 | 1570.112 |
| TTC28     | 215146_s_at  | 2.84078E-07 | 0.018355156 | 2544.68   | 1298.719 | 6209.663 | 1149.478 |
| MEF2A     | 212535_at    | 3.00861E-07 | 0.019439529 | 9706.6445 | 5396.622 | 11887.77 | 5440.895 |
| macrod2   | 1563209_a_at | 3.0785E-07  | 0.019891129 | 184.3303  | 38.09488 | 508.0417 | 18.85816 |
| MIR600HG  | 223522_at    | 3.08557E-07 | 0.019936824 | 1407.56   | 1042.167 | 3069.487 | 1041.736 |
| CEP135    | 207286_at    | 3.08913E-07 | 0.019959818 | 1298.132  | 717.6    | 1271.266 | 1637.935 |
| ddit4     | 202887_s_at  | 3.10287E-07 | 0.020048597 | 11809.72  | 3345.546 | 23647.19 | 5434.229 |
| APOBEC3G  | 204205_at    | 3.13436E-07 | 0.020252014 | 5731.4565 | 4699.4   | 6028.846 | 4787.343 |
| PLCB1     | 244726_at    | 3.15233E-07 | 0.020368157 | 10502.86  | 6360.3   | 10379.51 | 13070.96 |
| macrod2   | 235278_at    | 3.17235E-07 | 0.02049748  | 661.23945 | 305.8    | 1525.727 | 74.49471 |
| MAST4     | 225613_at    | 3.23528E-07 | 0.020904088 | 3701.5815 | 1926.656 | 2429.349 | 5106.149 |
| Slc23a1   | 223732_at    | 3.25742E-07 | 0.021047197 | 608.27305 | 255.5773 | 1287.001 | 629.1973 |
| Cobll1    | 229598_at    | 3.29551E-07 | 0.021293285 | 244.4438  | 68.84483 | 366.6297 | 5.6476   |
| CDH4      | 206866_at    | 3.39061E-07 | 0.021907723 | 350.3036  | 138.6076 | 882.6906 | 1689.195 |
| SEP9      | 1559025_at   | 3.39532E-07 | 0.021938184 | 2289.037  | 1383.718 | 2538.581 | 2448.755 |
| FAM134B   | 218532_s_at  | 3.46551E-07 | 0.022391711 | 2120.439  | 451.9    | 2280.438 | 1154.616 |
| ADI1      | 222400_s_at  | 3.5628E-07  | 0.023020302 | 5656.9645 | 10340.9  | 4628.521 | 5006.411 |
| Irf1      | 202531_at    | 3.59671E-07 | 0.023239408 | 4888.347  | 3477.7   | 6176.209 | 6660.018 |
| AKAP13    | 243450_at    | 3.70279E-07 | 0.023924817 | 2011.4395 | 1338.5   | 2094.872 | 1690.914 |
| PTAR1     | 226110_at    | 3.7224E-07  | 0.024051535 | 7710.517  | 5827.46  | 9080.488 | 7686.483 |
| PRKCH     | 233411_at    | 3.74117E-07 | 0.024172843 | 2504.242  | 1193.79  | 3232.133 | 1389.637 |
| GSTA4     | 202967_at    | 3.76774E-07 | 0.024344508 | 1526.474  | 754.8    | 1552.284 | 5132.125 |
| igf2bp3   | 203820_s_at  | 3.84227E-07 | 0.02482607  | 1293.566  | 548.2443 | 797.7154 | 335.7602 |
| ST3GAL1   | 215874_at    | 3.97665E-07 | 0.025694347 | 1804.316  | 1087.914 | 779.171  | 1777.879 |
| NIPAL2    | 227001_at    | 4.12725E-07 | 0.026667383 | 1945.9    | 3685.332 | 931.9128 | 2907.076 |
| ANKRD6    | 204672_s_at  | 4.18963E-07 | 0.027070456 | 890.8073  | 375.5977 | 1301.673 | 1307.545 |
| SH3TC1    | 219256_s_at  | 4.21485E-07 | 0.027233426 | 4362.881  | 1774.769 | 4871.644 | 1738.034 |
| ERICH1    | 1563315_s_at | 4.24589E-07 | 0.027433967 | 3163.609  | 2006.416 | 3315.286 | 3107.118 |
| ZNF418    | 243439_at    | 4.30844E-07 | 0.027838141 | 1095.074  | 687.9389 | 1007.506 | 2139.717 |
| cb2       | 205008_s_at  | 4.3161E-07  | 0.027887644 | 982.1022  | 519.9543 | 1064.565 | 791.604  |
| FLJ43663  | 222378_at    | 4.3371E-07  | 0.028023319 | 1405.8975 | 592.9    | 543.7585 | 1067.471 |
| poiB      | 203616_at    | 4.43161E-07 | 0.028633989 | 7437.467  | 6060.9   | 7988.343 | 5455.857 |

|                   |              |             |             |            |          |          |          |
|-------------------|--------------|-------------|-------------|------------|----------|----------|----------|
| <i>csh1</i>       | 206885_x_at  | 4.47926E-07 | 0.028941861 | 366.6388   | 95.21268 | 1142.51  | 241.6674 |
| <i>HOOK1</i>      | 225792_at    | 4.5153E-07  | 0.029174696 | 610.21885  | 149.781  | 505.5481 | 2245.486 |
| <i>HLA-DRB3</i>   | 221491_x_at  | 4.53328E-07 | 0.029290905 | 4915.5225  | 1067.105 | 6277.734 | 1498.757 |
| <i>ST3GAL1</i>    | 208322_s_at  | 4.54563E-07 | 0.029370705 | 1437.99    | 962.9939 | 1258.839 | 1119.31  |
| <i>DDR1</i>       | 1007_s_at    | 4.55679E-07 | 0.029442799 | 1969.948   | 733.6422 | 4455.432 | 787.7904 |
| <i>LIMS1</i>      | 1570259_at   | 4.6474E-07  | 0.030028255 | 1116.7265  | 601.9    | 1093.262 | 1434.241 |
| <i>RGPD1</i>      | 235597_s_at  | 4.73181E-07 | 0.03057362  | 264.7367   | 57.1     | 30.08063 | 192.5548 |
| <i>usp18</i>      | 219211_at    | 4.78972E-07 | 0.030947843 | 1044.03645 | 414.1576 | 1233.56  | 1193.462 |
| <i>AFF3</i>       | 227198_at    | 4.8722E-07  | 0.031480768 | 5071.447   | 2485.509 | 14389.12 | 3653.184 |
| <i>C16orf67</i>   | 219442_at    | 4.90257E-07 | 0.031676947 | 1367.021   | 631.3    | 1378.442 | 1115.088 |
| <i>CBX7</i>       | 212914_at    | 4.99423E-07 | 0.032269227 | 2010.134   | 1157.7   | 1863.379 | 1430.652 |
| <i>ml1</i>        | 226981_at    | 5.12865E-07 | 0.033137735 | 8016.59    | 5672.225 | 6824.888 | 8016.59  |
| <i>Crim1</i>      | 202552_s_at  | 5.2055E-07  | 0.033634296 | 1258.79    | 561.7    | 766.3839 | 725.4421 |
| <i>S1PR5</i>      | 230464_at    | 5.3293E-07  | 0.034434214 | 751.8      | 187.1531 | 786.3992 | 262.4233 |
| <i>brd4</i>       | 202103_at    | 5.36822E-07 | 0.034685676 | 1632.335   | 1018.679 | 2515.933 | 3131.76  |
| <i>SHANK3</i>     | 227923_at    | 5.50524E-07 | 0.035570976 | 5291.186   | 1508.471 | 3050.542 | 5166.972 |
| <i>TSPAN7</i>     | 234245_at    | 5.5645E-07  | 0.035953896 | 1042.70895 | 377.0579 | 2729.242 | 1845.77  |
| <i>LOC374443</i>  | 240572_s_at  | 5.57488E-07 | 0.036020997 | 2692.3355  | 1657.559 | 1159.518 | 1342.185 |
| <i>stt3b</i>      | 238303_at    | 5.58905E-07 | 0.036112545 | 6919.3345  | 4168.7   | 5947.376 | 11319.4  |
| <i>NOVA1</i>      | 205794_s_at  | 5.62696E-07 | 0.03635745  | 178.09525  | 135.9988 | 572.5845 | 1278.603 |
| <i>BEND7</i>      | 227341_at    | 5.80952E-07 | 0.037537075 | 98.295595  | 40.88484 | 115.4169 | 1014.277 |
| <i>INHBA</i>      | 227140_at    | 5.85487E-07 | 0.037830076 | 417.48225  | 184.8    | 434.0577 | 269.4488 |
| <i>fam171a1</i>   | 212771_at    | 5.90876E-07 | 0.038178256 | 2383.466   | 647.6708 | 1111.526 | 2383.466 |
| <i>MARCH9</i>     | 226454_at    | 6.23652E-07 | 0.040296054 | 1089.262   | 714.9005 | 1553.886 | 1467.659 |
| <i>Fnbp1</i>      | 213940_s_at  | 6.27492E-07 | 0.040544128 | 8431.902   | 6390.808 | 5679.768 | 15355.64 |
| <i>FAIM3</i>      | 221601_s_at  | 6.34696E-07 | 0.041009596 | 6396.264   | 1804.123 | 8598.693 | 7093.788 |
| <i>YWHAZ</i>      | 214848_at    | 6.38813E-07 | 0.041275595 | 1214.7195  | 834.0923 | 1022.822 | 1938.981 |
| <i>PRKCH</i>      | 206099_at    | 6.41125E-07 | 0.04142502  | 2653.46    | 1050.9   | 2229.518 | 1120.454 |
| <i>NCOA7</i>      | 243807_at    | 6.41555E-07 | 0.041452767 | 1071.7695  | 670.9133 | 778.2184 | 1182.657 |
| <i>C17orf58</i>   | 226901_at    | 6.48149E-07 | 0.041878821 | 781.42185  | 1512.6   | 880.4255 | 957.9495 |
| <i>Golga1</i>     | 214997_at    | 6.55561E-07 | 0.042357776 | 1345.392   | 864.095  | 1115.999 | 1934.302 |
| <i>Smpd3</i>      | 219695_at    | 6.75307E-07 | 0.043633626 | 403.52195  | 205.4355 | 1161.458 | 128.0978 |
| <i>KLHL6</i>      | 228167_at    | 6.76196E-07 | 0.04369108  | 6270.619   | 3934.025 | 6479.031 | 5572.73  |
| <i>TNRC6B</i>     | 238468_at    | 6.84022E-07 | 0.044196741 | 4371.362   | 3118.958 | 3385.481 | 4896.129 |
| <i>TRBV27</i>     | 241133_at    | 6.87658E-07 | 0.04443167  | 21048.435  | 6380.6   | 19427.26 | 1399.316 |
| <i>stk24</i>      | 208854_s_at  | 6.92434E-07 | 0.044740266 | 5569.3235  | 3499.5   | 7785.897 | 6071.486 |
| <i>NCRNA00118</i> | 230488_s_at  | 7.01127E-07 | 0.0453019   | 499.10015  | 312.7134 | 694.5419 | 365.4315 |
| <i>FLJ38379</i>   | 1556474_a_at | 7.09844E-07 | 0.045865163 | 1373.063   | 334.8    | 2998.249 | 2232.324 |
| <i>sntb2</i>      | 241613_at    | 7.24453E-07 | 0.046809085 | 950.912    | 510.5316 | 1478.808 | 976.3358 |
| <i>Rftn1</i>      | 215630_at    | 7.37384E-07 | 0.047644584 | 704.1537   | 445.236  | 727.7794 | 779.6472 |
| <i>C10orf11</i>   | 223703_at    | 7.38849E-07 | 0.047739218 | 948.37295  | 2581.4   | 2112.798 | 1491.595 |
| <i>Prr5l</i>      | 233379_at    | 7.44247E-07 | 0.048088052 | 423.164    | 227.3703 | 144.9773 | 423.164  |
| <i>Ngfr</i>       | 205858_at    | 7.46763E-07 | 0.048250603 | 162.61095  | 44.18648 | 56.90435 | 21.46637 |
| <i>Tcf7l2</i>     | 232522_at    | 7.6091E-07  | 0.049164679 | 2921.256   | 1282.05  | 2881.312 | 3739.292 |
| <i>Wasf2</i>      | 221725_at    | 7.62448E-07 | 0.049264058 | 7593.046   | 5756.447 | 7690.483 | 7899.498 |

**Supplementary Table 10b. Comparison of gene expression profiles between cases with high expression of wild-type *SETBP1* and *SETBP1* mutation.**

| Gene                | ID           | p-value     | Bonferroni correction | median exp (SETBP1 high N=20) | SETBP1 mutant 1 | SETBP1 mutant 2 |
|---------------------|--------------|-------------|-----------------------|-------------------------------|-----------------|-----------------|
| <i>KDM5D</i>        | 206700_s_at  | 0.694282289 | 1                     | 3950.28735                    | 56.95809        | 9.1635          |
| <i>RPS4Y1</i>       | 201909_at    | 0.401287823 | 1                     | 15494.85                      | 327.0542        | 62.22238        |
| <i>USP9Y</i>        | 206624_at    | 0.415171421 | 1                     | 335.488655                    | 8.40325         | 7.06499         |
| <i>ST18</i>         | 206135_at    | 0.545446641 | 1                     | 312.49585                     | 4.37063         | 11.93833        |
| <i>EIF1AY</i>       | 204409_s_at  | 0.97594039  | 1                     | 2285.6651                     | 40.93431        | 116.4617        |
| <i>SLITRK4</i>      | 230680_at    | 0.010398631 | 1                     | 796.318                       | 6.15691         | 53.04463        |
| <i>HOXB-AS3</i>     | 236892_s_at  | 0.047174024 | 1                     | 708.6851                      | 49.16701        | 5.63805         |
| <i>ZC2HC1A</i>      | 1560197_at   | 0.64223214  | 1                     | 84.35035                      | 2.48795         | 6.29364         |
| <i>TXLNG2P</i>      | 232618_at    | 0.431965027 | 1                     | 631.161845                    | 15.45823        | 56.28426        |
| <i>DDX3Y</i>        | 205000_at    | 0.564735949 | 1                     | 1579.07465                    | 81.65151        | 104.0446        |
| <i>TXLNG2P</i>      | 236694_at    | 0.759508076 | 1                     | 1354.0336                     | 119.9828        | 48.09658        |
| <i>USP9Y</i>        | 228492_at    | 0.322965555 | 1                     | 685.1364                      | 64.63863        | 20.76821        |
| <i>IPP</i>          | 1554739_at   | 0.146811343 | 1                     | 91.088595                     | 6.74536         | 4.84344         |
| <i>EMC1</i>         | 215991_s_at  | 0.512830468 | 1                     | 344.80715                     | 23.29783        | 21.03433        |
| <i>KALRN</i>        | 236651_at    | 0.784421452 | 1                     | 110.53695                     | 7.29411         | 7.07766         |
| <i>CTLA4</i>        | 236341_at    | 0.015178253 | 1                     | 385.6943                      | 28.34627        | 28.55128        |
| <i>TCP11L2</i>      | 1565525_a_at | 0.050399062 | 1                     | 289.08295                     | 26.57042        | 16.83651        |
| <i>TYR</i>          | 1555504_at   | 0.482264643 | 1                     | 32.885545                     | 2.45915         | 2.70304         |
| <i>CDNF</i>         | 1568696_at   | 0.42175654  | 1                     | 127.37345                     | 9.44728         | 10.82112        |
| <i>LOC286114</i>    | 244255_at    | 0.46981675  | 1                     | 172.5834                      | 11.04292        | 17.21869        |
| <i>STK4</i>         | 205411_at    | 0.129046988 | 1                     | 384.2496                      | 45.13301        | 18.21531        |
| <i>WDR67</i>        | 1556429_a_at | 0.4345484   | 1                     | 162.35745                     | 17.79659        | 9.05263         |
| <i>LOC100506403</i> | 210805_x_at  | 0.011920703 | 1                     | 324.5641                      | 14.90729        | 41.32024        |
| <i>UNC80</i>        | 230220_at    | 0.095964805 | 1                     | 99.36672                      | 5.15287         | 12.07671        |
| <i>LOC339862</i>    | 1567534_at   | 0.396995968 | 1                     | 41.139325                     | 2.61847         | 4.65641         |
| <i>PLEKHS1</i>      | 1554190_s_at | 0.695979903 | 1                     | 59.89347                      | 7.30014         | 3.54738         |
| <i>LOC339803</i>    | 227941_at    | 0.27161552  | 1                     | 793.37205                     | 43.97814        | 99.81873        |
| <i>RNF144B</i>      | 239704_at    | 0.389067723 | 1                     | 313.66575                     | 36.84151        | 20.01058        |
| <i>NCRNA00185</i>   | 207063_at    | 0.247737736 | 1                     | 219.7637                      | 33.87719        | 6.01839         |
| <i>TMEM74</i>       | 1552521_a_at | 0.059130802 | 1                     | 41.367875                     | 4.66356         | 2.8933          |
| <i>ERC2</i>         | 213938_at    | 0.113019184 | 1                     | 106.40885                     | 6.89018         | 12.57117        |
| <i>SOX2-OT</i>      | 231898_x_at  | 0.334816068 | 1                     | 30.967425                     | 2.39182         | 3.46735         |
| <i>TXLNG2P</i>      | 214131_at    | 0.933013752 | 1                     | 1822.2607                     | 161.4           | 183.5214        |
| <i>ATPBD4</i>       | 1560404_a_at | 0.704902406 | 1                     | 55.049815                     | 8.66979         | 2.04723         |
| <i>LOC100287177</i> | 1569086_at   | 0.009502012 | 1                     | 214.07455                     | 24.46805        | 17.72807        |
| <i>ZNF208</i>       | 208542_x_at  | 0.876515332 | 1                     | 143.90845                     | 22.76942        | 5.91458         |
| <i>XIRP2</i>        | 228794_at    | 6.27986E-05 | 1                     | 473.7516                      | 9.51278         | 85.59518        |
| <i>BDNF-AS</i>      | 1567359_at   | 0.362325216 | 1                     | 23.45391                      | 3.28424         | 1.43675         |
| <i>TAS2R45</i>      | 234108_at    | 0.31486983  | 1                     | 97.63135                      | 12.28737        | 7.49223         |
| <i>BMP2</i>         | 205290_s_at  | 0.099308865 | 1                     | 238.46605                     | 38.15946        | 10.7758         |
| <i>PRKAA2</i>       | 238441_at    | 0.864818799 | 1                     | 38.342                        | 3.01337         | 4.87106         |
| <i>LOC401098</i>    | 1556609_at   | 0.586084535 | 1                     | 84.479715                     | 3.2565          | 14.52406        |
| <i>MCF2L2</i>       | 215112_x_at  | 0.413194452 | 1                     | 67.44387                      | 3.05926         | 11.19275        |
| <i>CDKN2A</i>       | 207039_at    | 0.307497586 | 1                     | 134.09055                     | 16.08363        | 12.47932        |
| <i>LOC440704</i>    | 1562558_at   | 0.732604135 | 1                     | 106.401125                    | 15.84239        | 6.84002         |
| <i>LOC283665</i>    | 1557328_at   | 0.764349043 | 1                     | 111.1512                      | 11.16007        | 12.56351        |
| <i>LOC100506274</i> | 1556454_a_at | 0.901633137 | 1                     | 103.5542                      | 11.91982        | 10.26362        |
| <i>EIF1AY</i>       | 204410_at    | 0.676518875 | 1                     | 763.93095                     | 15.86957        | 147.9288        |
| <i>SLC6A2</i>       | 239394_at    | 0.141438933 | 1                     | 168.207                       | 23.67383        | 13.55427        |
| <i>RGS7</i>         | 1554500_a_at | 0.867414621 | 1                     | 132.75695                     | 12.07841        | 17.46778        |
| <i>ZFY</i>          | 230760_at    | 0.804834933 | 1                     | 481.3893                      | 36.31574        | 70.92482        |
| <i>TECR</i>         | 231556_at    | 0.526909702 | 1                     | 130.21375                     | 4.26118         | 24.76296        |
| <i>FUT2</i>         | 208505_s_at  | 0.883544029 | 1                     | 249.3283                      | 17.66437        | 38.33484        |
| <i>ZFY-AS1</i>      | 237225_at    | 0.379307879 | 1                     | 126.2353                      | 23.13581        | 5.96523         |
| <i>C12orf40</i>     | 1561721_a_at | 0.599153665 | 1                     | 58.29828                      | 7.57043         | 5.90774         |
| <i>SLC22A25</i>     | 1561094_at   | 0.445121901 | 1                     | 43.24749                      | 3.36556         | 6.66478         |
| <i>KLHL32</i>       | 1553765_a_at | 0.130101137 | 1                     | 70.93369                      | 7.74474         | 8.80209         |
| <i>OPRM1</i>        | 211359_s_at  | 0.884323676 | 1                     | 180.567                       | 18.56617        | 23.74603        |
| <i>PPM1H</i>        | 233911_s_at  | 0.020070964 | 1                     | 160.1089                      | 19.23838        | 18.53878        |
| <i>LOC100130815</i> | 1564471_at   | 0.015510992 | 1                     | 93.33892                      | 8.96081         | 13.10095        |
| <i>SPTSSB</i>       | 238702_at    | 0.512746983 | 1                     | 164.9367                      | 18.71618        | 20.32869        |
| <i>RGS13</i>        | 1568751_at   | 0.492607919 | 1                     | 15.942815                     | 1.28658         | 2.49384         |
| <i>FLJ43663</i>     | 238986_at    | 0.141015685 | 1                     | 185.9799                      | 15.7086         | 28.58955        |
| <i>CTNNA3</i>       | 1554235_at   | 0.428913891 | 1                     | 14.369455                     | 163.739         | 11.12904        |
| <i>MET</i>          | 203510_at    | 4.30956E-05 | 1                     | 91.66215                      | 176.0489        | 941.9171        |

|                     |              |             |             |           |          |          |
|---------------------|--------------|-------------|-------------|-----------|----------|----------|
| <i>TDGF1</i>        | 206286 s at  | 0.238469902 | 1           | 40.04949  | 162.8736 | 327.1857 |
| <i>CTSG</i>         | 205653 at    | 0.008374887 | 1           | 1250.9925 | 1434.405 | 13963.19 |
| <i>CLDN22</i>       | 218775 s at  | 0.55070041  | 1           | 110.0715  | 121.5448 | 1236.271 |
| <i>DTX3</i>         | 49049 at     | 0.751180754 | 1           | 74.03656  | 61.62205 | 854.5587 |
| <i>DCLK2</i>        | 227666 at    | 0.457465964 | 1           | 60.829495 | 160.831  | 592.4784 |
| <i>FCER2</i>        | 206760_s at  | 0.068101875 | 1           | 44.938975 | 512.267  | 45.57795 |
| <i>STOM</i>         | 201062 at    | 0.954524308 | 1           | 28.81282  | 108.3661 | 249.3313 |
| <i>LOC285095</i>    | 238196 at    | 0.714571173 | 1           | 19.28284  | 16.79646 | 223.562  |
| <i>PRLR</i>         | 227629 at    | 0.298945354 | 1           | 194.57575 | 2078.009 | 349.0263 |
| <i>BAZ1B</i>        | 229658 at    | 0.968867841 | 1           | 42.73939  | 264.2034 | 269.0831 |
| <i>SGCE</i>         | 204688 at    | 0.075642531 | 1           | 174.111   | 2169.923 | 18.98523 |
| <i>CYP2A13</i>      | 208327 at    | 0.881248872 | 1           | 36.65     | 23.77455 | 437.0986 |
| <i>DAB1</i>         | 228329 at    | 0.126543275 | 1           | 193.23405 | 187.9007 | 2247.104 |
| <i>OR7E19P</i>      | 216536 at    | 0.27834837  | 1           | 14.94293  | 10.92663 | 178.1505 |
| <i>COL1A1</i>       | 1556499_s at | 0.550632916 | 1           | 202.25735 | 2397.893 | 168.6384 |
| <i>HOMER3</i>       | 204647 at    | 0.003340761 | 1           | 1035.707  | 7523.668 | 5629.84  |
| <i>CDA</i>          | 205627 at    | 0.12929175  | 1           | 200.7428  | 727.1459 | 1822.332 |
| <i>COL4A1</i>       | 211980 at    | 0.543689949 | 1           | 268.5126  | 338.2607 | 3094.672 |
| <i>FOXC1</i>        | 1553613_s at | 0.250999752 | 1           | 363.75    | 602.7963 | 4056.996 |
| <i>ACACB</i>        | 214584_x at  | 0.21529864  | 1           | 44.58628  | 232.3079 | 339.0359 |
| <i>RGS6</i>         | 214538_x at  | 0.669018009 | 1           | 43.49628  | 72.34594 | 486.9131 |
| <i>DOHH</i>         | 213949_s at  | 0.432439362 | 1           | 36.977275 | 48.15561 | 427.9115 |
| <i>CWH43</i>        | 220724 at    | 0.214603549 | 1           | 9.54621   | 11.57761 | 112.4661 |
| <i>CTNND2</i>       | 209617_s at  | 0.023725903 | 1           | 146.8363  | 103.7435 | 1807.521 |
| <i>LOC100505912</i> | 239174 at    | 0.100466989 | 1           | 37.76308  | 196.3377 | 295.5211 |
| <i>EREG</i>         | 1569583 at   | 0.904159189 | 1           | 641.44635 | 70.62656 | 8351.661 |
| <i>PTPRD</i>        | 213362 at    | 0.501867295 | 1           | 174.87195 | 190.51   | 2106.601 |
| <i>NPW</i>          | 243110_x at  | 0.701303593 | 1           | 45.10223  | 549.1476 | 45.10223 |
| <i>PBX1</i>         | 212148 at    | 0.03618469  | 1           | 463.8481  | 334.4008 | 5778.286 |
| <i>MYBPH</i>        | 206304 at    | 0.701250668 | 1           | 48.55     | 90.57813 | 553.2309 |
| <i>FLJ30901</i>     | 1552388 at   | 0.688517651 | 1           | 196.13985 | 881.0526 | 1721.197 |
| <i>DPPA4</i>        | 241199_x at  | 0.903405925 | 1           | 50.38533  | 383.0499 | 286.6878 |
| <i>SNED1</i>        | 213488 at    | 7.24106E-08 | 0.004678663 | 434.1301  | 423.8784 | 5365.883 |
| <i>LOC728613</i>    | 1568762 at   | 0.481421476 | 1           | 30.538345 | 187.2971 | 222.0731 |
| <i>SIGLEC9</i>      | 210569_s at  | 0.16078621  | 1           | 59.607135 | 775.5965 | 29.45751 |
| <i>DEFB1</i>        | 210397 at    | 0.305025226 | 1           | 297.78345 | 2547.231 | 1477.959 |
| <i>GREB1</i>        | 205862 at    | 0.305787364 | 1           | 19.311285 | 11.4797  | 249.8863 |
| <i>GNA14</i>        | 220108 at    | 0.258500347 | 1           | 69.3      | 256.8393 | 695.3547 |
| <i>POFUT2</i>       | 207448 at    | 0.549728496 | 1           | 29.77904  | 312.0954 | 98.0475  |
| <i>MAF</i>          | 1566323 at   | 0.335336579 | 1           | 10.25     | 32.06108 | 109.3402 |
| <i>HFM1</i>         | 241469 at    | 0.15454546  | 1           | 23.02079  | 20.29171 | 303.2304 |
| <i>POF1B</i>        | 1555383 a at | 0.295315533 | 1           | 16.177545 | 34.13367 | 193.6236 |
| <i>LMO3</i>         | 231348_s at  | 0.460676377 | 1           | 22.56743  | 146.3394 | 171.7613 |
| <i>CCDC158</i>      | 1554846 at   | 0.079583224 | 1           | 24.32471  | 189.1486 | 153.7652 |
| <i>MFAP4</i>        | 212713 at    | 1.14833E-07 | 0.007419695 | 366.0533  | 4816.192 | 366.0533 |
| <i>MYCN</i>         | 209756_s at  | 0.947166229 | 1           | 35.51606  | 120.1987 | 386.6899 |
| <i>LOC100506328</i> | 1560679 at   | 0.271235802 | 1           | 63.04544  | 858.0397 | 43.61737 |
| <i>PPP1R9A</i>      | 228494 at    | 0.012067794 | 1           | 276.1807  | 3668.806 | 287.6614 |
| <i>TTC40</i>        | 220539 at    | 0.678145117 | 1           | 34.25     | 195.7945 | 295.3887 |
| <i>MFSD7</i>        | 214269 at    | 0.481362757 | 1           | 36.94467  | 149.5118 | 380.4905 |
| <i>TMPRSS3</i>      | 223948_s at  | 0.05812293  | 1           | 91.20225  | 36.8482  | 1272.964 |
| <i>TMEM98</i>       | 223170 at    | 0.02939274  | 1           | 88.77728  | 56.6215  | 1229.672 |
| <i>PRR16</i>        | 1554867 a at | 0.470570984 | 1           | 141.423   | 370.526  | 1684.391 |
| <i>PCDHGC4</i>      | 231753_s at  | 0.350471617 | 1           | 22.06688  | 39.47215 | 284.8542 |
| <i>KCNV1</i>        | 220294 at    | 0.402279979 | 1           | 11.934645 | 13.34305 | 162.6318 |
| <i>DAZ1</i>         | 207912_s at  | 0.932172143 | 1           | 7.68542   | 19.90165 | 93.56784 |
| <i>PLA2G5</i>       | 215871 at    | 0.70003935  | 1           | 43.83697  | 236.53   | 411.3802 |
| <i>ELOVL2</i>       | 213712 at    | 0.588591268 | 1           | 27.245805 | 375.0946 | 27.99161 |
| <i>NRG1</i>         | 208241 at    | 0.113404263 | 1           | 166.7164  | 290.4274 | 2178.883 |
| <i>GDF10</i>        | 206159 at    | 0.035979206 | 1           | 157.7163  | 211.0802 | 2135.699 |
| <i>TRH</i>          | 206622 at    | 0.662034376 | 1           | 457.726   | 442.2906 | 6401.701 |
| <i>LGALS12</i>      | 223828_s at  | 0.022158442 | 1           | 83.85     | 197.6549 | 1064.186 |
| <i>CFHR5</i>        | 208088_s at  | 0.802635761 | 1           | 12.83327  | 11.2021  | 184.743  |
| <i>IRGQ</i>         | 242183 at    | 0.824778903 | 1           | 28.28006  | 335.643  | 96.30032 |
| <i>PEG10</i>        | 212094 at    | 0.161084496 | 1           | 164.6711  | 2502.282 | 19.8959  |
| <i>DAPL1</i>        | 229290 at    | 0.304976897 | 1           | 63.75171  | 44.54243 | 934.5373 |
| <i>LRRN1</i>        | 226884 at    | 1.58138E-06 | 0.102177522 | 232.55515 | 724.4062 | 2849.184 |
| <i>LPAL2</i>        | 210909_x at  | 0.531809403 | 1           | 29.59075  | 169.8038 | 288.1998 |
| <i>FAM110B</i>      | 221959 at    | 0.406790746 | 1           | 44.931    | 28.5734  | 672.0267 |
| <i>MCAM</i>         | 211340_s at  | 3.10091E-05 | 1           | 314.1494  | 192.4118 | 4706.34  |
| <i>ZNF503</i>       | 227195 at    | 0.056315874 | 1           | 402.0958  | 2074.858 | 4263.116 |
| <i>NAV3</i>         | 204823 at    | 0.356022094 | 1           | 51.473345 | 51.64669 | 765.46   |
| <i>MEG3</i>         | 210794_s at  | 0.871004759 | 1           | 59.51261  | 33.99963 | 916.4865 |
| <i>CXCL14</i>       | 222484_s at  | 0.958636114 | 1           | 28.76687  | 449.4167 | 11.1258  |

|              |              |             |             |           |          |          |
|--------------|--------------|-------------|-------------|-----------|----------|----------|
| CYP1B1       | 202434 s at  | 0.489849582 | 1           | 21.37931  | 296.6472 | 46.74595 |
| GPC5         | 207174 at    | 7.76552E-06 | 0.501753548 | 84.07935  | 93.23876 | 1261.136 |
| AKR1C1       | 217626 at    | 0.063589904 | 1           | 109.594   | 81.89236 | 1684.444 |
| DOK6         | 241729 at    | 0.691735321 | 1           | 19.74645  | 24.06806 | 296.1346 |
| CABLES1      | 1558621 at   | 0.573803487 | 1           | 92.2921   | 63.94252 | 1433.456 |
| LOC100653010 | 221576 at    | 0.847590266 | 1           | 19.834185 | 18.86837 | 304.5097 |
| TNFSF14      | 207907 at    | 0.374064511 | 1           | 50.423725 | 800.0702 | 30.8491  |
| IGLV6-57     | 215035 at    | 0.434225412 | 1           | 38.709735 | 620.7621 | 19.46989 |
| FGF18        | 206987 x at  | 0.095767997 | 1           | 47.85511  | 74.73234 | 728.9922 |
| GFRA1        | 227550 at    | 0.578069579 | 1           | 36.243205 | 239.0594 | 378.8635 |
| NTRK1        | 208605 s at  | 0.444332476 | 1           | 22.750795 | 22.52724 | 366.3514 |
| RXFP1        | 231804 at    | 0.056054269 | 1           | 601.5537  | 2944.267 | 7527.572 |
| FAM124A      | 230519 at    | 0.071197989 | 1           | 68.157225 | 1072.339 | 124.5355 |
| WWTR1        | 202134 s at  | 0.51965969  | 1           | 21.4923   | 20.44323 | 360.217  |
| LOC100292909 | 241535 at    | 0.012956052 | 1           | 64.31009  | 72.6214  | 1068.224 |
| NCR1         | 217088 s at  | 0.483525015 | 1           | 20.726045 | 18.64233 | 350.131  |
| PTPN14       | 226282 at    | 0.030192002 | 1           | 64.197605 | 75.59521 | 1097.888 |
| LOC283484    | 1556940 at   | 0.364016144 | 1           | 8.54403   | 135.5416 | 20.79093 |
| IL23R        | 1561853_a at | 0.965520723 | 1           | 20.94094  | 137.1936 | 249.3713 |
| CDC25C       | 216914 at    | 0.400559648 | 1           | 36.227895 | 278.4731 | 402.3666 |
| AQP4         | 210067 at    | 0.962084964 | 1           | 8.35662   | 3.8675   | 154.0581 |
| PIR          | 207469 s at  | 0.868957137 | 1           | 147.03155 | 128.7971 | 2651.371 |
| LOX          | 215446 s at  | 0.071017165 | 1           | 249.777   | 178.8047 | 4572.884 |
| DSG2         | 217901 at    | 9.63658E-07 | 0.062264867 | 384.11015 | 323.6422 | 7040.605 |
| CTNND2       | 209618 at    | 0.004684009 | 1           | 42.45     | 23.32869 | 797.3202 |
| TMEM176B     | 220532 s at  | 0.575716985 | 1           | 690.1432  | 13478.97 | 193.6421 |
| EREG         | 205767 at    | 0.659062241 | 1           | 591.1     | 103.0895 | 11778.15 |
| COL4A1       | 211981 at    | 0.906112353 | 1           | 30.54406  | 133.2209 | 483.0608 |
| RXFP1        | 238206 at    | 0.036132257 | 1           | 801.2228  | 4957.771 | 11496.3  |
| MARC1        | 218865 at    | 0.014656409 | 1           | 86.334885 | 1136.568 | 643.5128 |
| ORM1         | 205040 at    | 0.998040616 | 1           | 27.869145 | 33.4669  | 552.8414 |
| RORB         | 206443 at    | 0.002978052 | 1           | 76.28813  | 14.48909 | 1596.267 |
| LDLR         | 217103 at    | 0.353301087 | 1           | 14.0832   | 11.82386 | 286.1098 |
| RHBDL3       | 233409 at    | 0.9035715   | 1           | 54.1446   | 21.15967 | 1153.435 |
| NXF3         | 220110 s at  | 0.027052112 | 1           | 24.50322  | 10.10868 | 523.7061 |
| AKR1C1       | 1555854 at   | 9.5103E-05  | 1           | 118.4809  | 243.8284 | 2371.156 |
| HOMER3       | 222222 s at  | 0.012843678 | 1           | 103.8974  | 1233.067 | 1086.415 |
| LOC728052    | 1558795 at   | 0.918192309 | 1           | 67.04861  | 1443.038 | 67.04861 |
| COBL         | 213050 at    | 5.92293E-16 | 3.82698E-11 | 223.66045 | 4518.953 | 630.8448 |
| TNFSF11      | 210643 at    | 3.17393E-05 | 1           | 114.7185  | 13.3786  | 2641.208 |
| FCAR         | 211306 s at  | 0.253547359 | 1           | 40.06374  | 781.4969 | 149.1304 |
| POU1F1       | 207846 at    | 0.031510149 | 1           | 42.1      | 56.66555 | 950.2228 |
| VWF          | 202112 at    | 0.985536917 | 1           | 137.2257  | 155.8757 | 3130.01  |
| DEFA1        | 205033 s at  | 0.552215636 | 1           | 906.269   | 324.4041 | 21729.49 |
| PHLDB2       | 1554778 at   | 0.473657912 | 1           | 8.00607   | 72.73761 | 122.5171 |
| INSM1        | 206502 s at  | 0.631012237 | 1           | 20.902245 | 378.9745 | 132.7847 |
| DHCR24       | 200862 at    | 0.208707009 | 1           | 650.8766  | 705.5933 | 15311.75 |
| AKR1C2       | 211653 x at  | 0.041955073 | 1           | 800.64615 | 1024.793 | 18969.19 |
| EPPK1        | 232165 at    | 8.39451E-06 | 0.542394251 | 100.62455 | 206.1347 | 2339.213 |
| PTPRD        | 214043 at    | 0.068770232 | 1           | 247.492   | 280.1789 | 5994.5   |
| PTPRB        | 230250 at    | 0.058179005 | 1           | 103.33167 | 78.56194 | 2560.212 |
| BEX1         | 218332 at    | 0.760963738 | 1           | 958.7485  | 444.2147 | 24302.87 |
| PTPRN2       | 203030 s at  | 0.216522464 | 1           | 48.03874  | 704.1254 | 563.6624 |
| LRCH2        | 227688 at    | 0.07393975  | 1           | 17.72734  | 17.75468 | 477.9551 |
| FGFR2        | 203638 s at  | 0.001090214 | 1           | 26.507925 | 57.31082 | 684.7302 |
| RGS6         | 236726 at    | 0.035540697 | 1           | 17.33636  | 34.35672 | 457.1668 |
| ZFP57        | 231236 at    | 0.875307623 | 1           | 42.463715 | 48.12743 | 1169.301 |
| AKR1C1       | 216594_x at  | 0.032798302 | 1           | 920.34995 | 1426.874 | 26040.73 |
| AKR1C1       | 204151_x at  | 0.0004906   | 1           | 1475.6795 | 1478.819 | 43167.59 |
| TMPRSS3      | 223949 at    | 0.001685861 | 1           | 87.713995 | 103.753  | 2581.522 |
| ERVFRD-1     | 1555880 at   | 0.231672795 | 1           | 28.410385 | 25.72077 | 850.3707 |
| IGSF11       | 228375 at    | 0.219220335 | 1           | 33.03913  | 183.9509 | 854.4152 |
| VMO1         | 235751 s at  | 0.136633716 | 1           | 12.079845 | 12.72739 | 367.7864 |
| EDIL3        | 225275 at    | 0.560862286 | 1           | 272.677   | 257.7331 | 8908.313 |
| AJAP1        | 215790 at    | 3.7598E-09  | 0.000242932 | 13.964925 | 9.80116  | 463.8555 |
| CDH9         | 207729 at    | 5.6255E-09  | 0.00036348  | 363.3126  | 736.7101 | 12213.79 |
| TMPRSS3      | 220177_s at  | 3.04874E-05 | 1           | 150.41735 | 134.8985 | 5291.198 |
| PGBD5        | 219225 at    | 0.039080446 | 1           | 64.01736  | 120.7576 | 2232.37  |
| SLC44A5      | 235763 at    | 0.226846007 | 1           | 71.723335 | 1853.608 | 939.6198 |
| PRR16        | 220014 at    | 0.503304743 | 1           | 123.8413  | 878.8698 | 4677.579 |
| MECOM        | 226420 at    | 0.850435406 | 1           | 135.56635 | 142.5754 | 6543.227 |
| LEMD1-AS1    | 1561280 at   | 0.030888566 | 1           | 7.551805  | 8.07607  | 392.0937 |
| ABCA8        | 204719 at    | 0.000109841 | 1           | 150.1717  | 8712.473 | 16.18574 |
| LOC643401    | 1557765 at   | 0.104257777 | 1           | 24.15258  | 42.82973 | 1375.846 |



|                |             |             |             |            |          |          |
|----------------|-------------|-------------|-------------|------------|----------|----------|
| <i>MECOM</i>   | 221884 at   | 0.859796781 | 1           | 107.146675 | 80.59335 | 6381.95  |
| <i>MDGA2</i>   | 239935 at   | 0.021074252 | 1           | 19.27102   | 34.73853 | 1416.207 |
| <i>EPPK1</i>   | 232164 s at | 0.000136348 | 1           | 40.25406   | 20.37426 | 3290.186 |
| <i>AKR1C2</i>  | 209699 x at | 0.0005914   | 1           | 380.11     | 1196.589 | 32451.79 |
| <i>SLITRK6</i> | 235976 at   | 0.69996096  | 1           | 6.25738    | 2.64845  | 609.7662 |
| <i>RORB</i>    | 242385 at   | 7.09796E-05 | 1           | 154.2135   | 23.05367 | 26245.1  |
| <i>DLK1</i>    | 209560 s at | 1.96055E-07 | 0.012667725 | 391.80285  | 154.5353 | 76735.45 |
| <i>KCNK12</i>  | 220448 at   | 0.016518957 | 1           | 37.83076   | 14507.24 | 15.13075 |

### Supplementary Table 11. Univariate and multivariate analyses of overall survival.

#### Whole cohort of myeloid malignancies (N= 547)

| Univariate   | Variable*                          | Hazard ratio | 95% CI    | P value**        |
|--------------|------------------------------------|--------------|-----------|------------------|
|              | Male sex                           | 1.53         | 1.20-1.96 | <b>&lt;0.001</b> |
|              | Age (>60 years)                    | 1.92         | 1.48-2.51 | <b>&lt;0.001</b> |
|              | Increased bone marrow blast (>10%) | 1.52         | 1.21-1.91 | <b>&lt;0.001</b> |
|              | -7/del(7q)                         | 2.05         | 1.53-2.70 | <b>&lt;0.001</b> |
|              | Complex karyotype (≥3)             | 1.35         | 0.95-1.87 | 0.09             |
|              | <i>SETBP1</i> mutation             | 2.30         | 1.58-3.25 | <b>&lt;0.001</b> |
|              | <i>RUNX1</i> mutation              | 1.45         | 0.87-2.29 | 0.15             |
|              | <i>ASXL1</i> mutation              | 2.15         | 1.40-3.24 | <b>&lt;0.001</b> |
|              | <i>SRSF2</i> mutation              | 2.09         | 1.33-3.19 | <b>0.002</b>     |
|              | <i>U2AF1</i> mutation              | 1.94         | 0.92-3.60 | 0.05             |
|              | <i>CBL</i> mutation                | 2.50         | 1.42-4.13 | <b>0.002</b>     |
|              | <i>KRAS</i> mutation               | 1.49         | 0.46-3.57 | 0.46             |
|              | <i>NRAS</i> mutation               | 2.24         | 0.37-7.21 | 0.32             |
|              | <i>DNMT3A</i> mutation             | 2.66         | 1.41-4.60 | <b>0.004</b>     |
|              | <i>TET2</i> mutation               | 1.31         | 0.88-1.89 | 0.18             |
|              | <i>IDH1/2</i> mutation             | 0.85         | 0.26-2.02 | 0.75             |
| Multivariate | Variable*                          | Hazard ratio | 95% CI    | P value**        |
|              | Male sex                           | 1.98         | 1.25-3.19 | <b>0.004</b>     |
|              | Age (>60 years)                    | 2.86         | 1.58-5.41 | <b>&lt;0.001</b> |
|              | Increased bone marrow blast (>10%) | 1.37         | 0.85-2.23 | 0.20             |
|              | -7/del(7q)                         | 1.32         | 0.69-2.42 | 0.39             |
|              | <i>SETBP1</i> mutation             | 2.90         | 1.71-4.83 | <b>&lt;0.001</b> |
|              | <i>ASXL1</i> mutation              | 1.75         | 1.03-2.96 | <b>0.04</b>      |
|              | <i>SRSF2</i> mutation              | 1.14         | 0.63-2.02 | 0.65             |
|              | <i>CBL</i> mutation                | 2.15         | 1.05-4.09 | <b>0.04</b>      |
|              | <i>DNMT3A</i> mutation             | 3.59         | 1.57-7.40 | <b>0.004</b>     |

#### MDS and CMML (WBC<12,000/μl) cohort (N=317)

| Univariate | Variable*                          | Hazard ratio | 95% CI    | P value**        |
|------------|------------------------------------|--------------|-----------|------------------|
|            | Male sex                           | 1.44         | 1.06-1.99 | <b>0.02</b>      |
|            | Age (>60 years)                    | 1.5          | 1.09-2.10 | <b>0.01</b>      |
|            | Increased bone marrow blast (>10%) | 2.35         | 1.76-3.16 | <b>&lt;0.001</b> |
|            | IPSS                               |              |           | <b>&lt;0.001</b> |
|            | low vs int-1                       | 0.95         | 0.56-1.68 | 0.84             |
|            | low vs int-2                       | 1.67         | 0.97-2.98 | 0.06             |
|            | low vs high                        | 2.07         | 1.26-3.63 | <b>0.004</b>     |
|            | int-1 vs int-2                     | 1.76         | 1.19-2.60 | <b>0.005</b>     |
|            | int-1 vs high                      | 2.19         | 1.55-3.13 | <b>&lt;0.001</b> |

|              | int-2 vs high                      | 1.25         | 0.87-1.81  | 0.24         |
|--------------|------------------------------------|--------------|------------|--------------|
|              | <i>SETBP1</i> mutation             | 1.92         | 1.20-2.94  | <b>0.008</b> |
|              | <i>RUNX1</i> mutation              | 0.73         | 0.38-1.29  | 0.29         |
|              | <i>ASXL1</i> mutation              | 1.28         | 0.71-2.19  | 0.4          |
|              | <i>SRSF2</i> mutation              | 0.91         | 0.47-1.62  | 0.76         |
|              | <i>U2AF1</i> mutation              | 1.01         | 0.42-2.04  | 0.99         |
|              | <i>CBL</i> mutation                | 1.26         | 0.61-2.34  | 0.51         |
|              | <i>KRAS</i> mutation               | 0.31         | 0.017-1.47 | 0.17         |
|              | <i>NRAS</i> mutation               | 1.36         | 0.07-6.45  | 0.77         |
|              | <i>DNMT3A</i> mutation             | 2.37         | 1.08-4.63  | <b>0.03</b>  |
|              | <i>TET2</i> mutation               | 0.9          | 0.50-1.53  | 0.72         |
|              | <i>IDH1/2</i> mutation             | 0.42         | 0.02-1.91  | 0.32         |
| Multivariate | Variable*                          | Hazard ratio | 95% CI     | P value**    |
|              | Male sex                           | 1.74         | 1.05-2.99  | <b>0.03</b>  |
|              | Age (>60 years)                    | 1.19         | 0.67-2.21  | 0.56         |
|              | Increased bone marrow blast (>10%) | 2.12         | 1.06-4.22  | <b>0.03</b>  |
|              | IPSS                               |              |            | 0.95         |
|              | <i>SETBP1</i> mutation             | 1.83         | 1.04-3.12  | <b>0.04</b>  |
|              | <i>DNMT3A</i> mutation             | 1.92         | 0.81-4.13  | 0.13         |

\*Some data are not available. \*\*Statistically significant p values were indicated with bold font.

**Supplementary Table 12. IPSS score in myeloid malignancies with or without *SETBP1* mutations.**

|               | <i>SETBP1</i> mutation | WT <i>SETBP1</i> | P <sup>a</sup> |
|---------------|------------------------|------------------|----------------|
| IPSS; no. (%) |                        |                  | 0.31           |
| Low           | 30 (11.32)             | 2 (7.14)         |                |
| INT-1         | 89 (33.58)             | 8 (28.57)        |                |
| INT-2         | 62 (23.4)              | 4 (14.29)        |                |
| HIGH          | 84 (31.7)              | 14 (50)          |                |

<sup>a</sup> A Fisher's exact test was used to determine the P values.

**Supplementary Table 13. Prognostic significance according to *SETBP1* and *CBL* mutation status.**

| <b>Whole cohort of myeloid malignancies (N= 256)</b> |            |    |               |            |              |            |                  |
|------------------------------------------------------|------------|----|---------------|------------|--------------|------------|------------------|
| <i>SETBP1</i>                                        | <i>CBL</i> | VS | <i>SETBP1</i> | <i>CBL</i> | Hazard ratio | 95% CI     | P value*         |
| wild type                                            | mutation   |    | wild type     | wild type  | 1.97         | 0.87-3.82  | 0.1              |
| mutation                                             | wild type  |    | wild type     | wild type  | 2.86         | 1.80-4.39  | <b>&lt;0.001</b> |
| mutation                                             | wild type  |    | wild type     | mutation   | 1.45         | 0.69-3.44  | 0.3              |
| mutation                                             | mutation   |    | wild type     | wild type  | 6.55         | 2.85-13.17 | <b>&lt;0.001</b> |
| mutation                                             | mutation   |    | wild type     | mutation   | 3.33         | 1.21-9.20  | <b>0.02</b>      |
| mutation                                             | mutation   |    | mutation      | wild type  | 2.29         | 0.96-4.92  | 0.06             |

| <b>CMML (N= 74)</b> |            |    |               |            |              |            |             |
|---------------------|------------|----|---------------|------------|--------------|------------|-------------|
| <i>SETBP1</i>       | <i>CBL</i> | VS | <i>SETBP1</i> | <i>CBL</i> | Hazard ratio | 95% CI     | P value*    |
| wild type           | mutation   |    | wild type     | wild type  | 1.19         | 0.40-2.85  | 0.7         |
| mutation            | wild type  |    | wild type     | wild type  | 1.54         | 0.75-3.00  | 0.2         |
| mutation            | wild type  |    | wild type     | mutation   | 1.3          | 0.48-4.09  | 0.6         |
| mutation            | mutation   |    | wild type     | wild type  | 3.81         | 1.25-9.65  | <b>0.02</b> |
| mutation            | mutation   |    | wild type     | mutation   | 3.19         | 0.86-11.92 | 0.08        |
| mutation            | mutation   |    | mutation      | wild type  | 2.46         | 0.76-7.03  | 0.1         |

| <b>Secondary AML (N= 56)</b> |            |    |               |            |              |            |         |
|------------------------------|------------|----|---------------|------------|--------------|------------|---------|
| <i>SETBP1</i>                | <i>CBL</i> | VS | <i>SETBP1</i> | <i>CBL</i> | Hazard ratio | 95% CI     | P value |
| wild type                    | mutation   |    | wild type     | wild type  | 3.36         | 0.18-17.00 | 0.3     |
| mutation                     | wild type  |    | wild type     | wild type  | 1.93         | 0.89-3.93  | 0.09    |
| mutation                     | wild type  |    | wild type     | mutation   | 0.57         | 0.11-10.65 | 0.6     |
| mutation                     | mutation   |    | wild type     | wild type  | 4.02         | 0.93-12.11 | 0.06    |
| mutation                     | mutation   |    | wild type     | mutation   | 1.19         | 0.15-24.50 | 0.9     |
| mutation                     | mutation   |    | mutation      | wild type  | 2.09         | 0.47-6.81  | 0.3     |

\*Statistically significant p values were indicated with bold font.

**Supplementary Table 14. Primers for *SETBP1* sequencing and PCR specific for mutant alleles.**

| <i>SETBP1</i> Sequencing          |                              |
|-----------------------------------|------------------------------|
| Exon2_Forward                     | TCACCTTCCCTTTTCCC            |
| Exon2_Reverse                     | CCCTAAGAAGTTGAGGATAAAATG     |
| Exon3_Forward                     | TGGTAAGTCCATTGCTGGTC         |
| Exon3_Reverse                     | ATCCAAGGTTCCGGGTTTCTG        |
| Exon4_1_Forward                   | CATGCTCATCTTTGTTTCTCTCTC     |
| Exon4_1_Reverse                   | ATGCTTTCTGGGCATTCTTG         |
| Exon4_2_Forward                   | CCCCAGAACCACCTACGG           |
| Exon4_2_Reverse                   | TTTGGATGCTGGATTTCTGG         |
| Exon4_3_Forward                   | CCCAGGAGGTGTGTCTAAGC         |
| Exon4_3_Reverse                   | CTTTTGCCTTCAGAGCAACG         |
| Exon4_4_Forward                   | AGAAAGTTGGAAAGCTCGGC         |
| Exon4_4_Reverse                   | GGACAGCGTGATTTCTTTAG         |
| Exon4_5_Forward                   | ACACAGTGGAACCTGGAAGC         |
| Exon4_5_Reverse                   | AGGCCTACCACGCTTCTTC          |
| Exon4_6_Forward                   | ACCACGAGAATCCATATCCC         |
| Exon4_6_Reverse                   | CTTTGTCTGCGCTACTCAGC         |
| Exon4_7_Forward                   | CACAAGCATAAGCACAAGGAAG       |
| Exon4_7_Reverse                   | ATGTGTCTGAGGTGCAAAGC         |
| Exon5_Forward                     | TGTTGTCTATCTTCCTGTTCCC       |
| Exon5_Reverse                     | TCAACAGGCCATTCTCAGTG         |
| Exon6_1_Forward                   | AGAGGCTGAGTTGAAGGCAC         |
| Exon6_1_Reverse                   | GGTGGCCATGATGGTGTCT          |
| Exon6_2_Forward                   | GACCTGCCCAGCAAAGAG           |
| Exon6_2_Reverse                   | CGCTTCCCACGTGTCAG            |
| Allele specific PCR (p.Asp868Asn) |                              |
| SETBP1_D868N_OF                   | TTCAGTCACTTGTGGCGTCT         |
| SETBP1_D868N_OR                   | ATGGCACCGGGTAATAGTGA         |
| SETBP1_D868N_FA                   | GGAGACGATCCCCAGCA            |
| SETBP1_D868N_RG                   | TCCAATGCCGCTGTC              |
| Allele specific PCR (p.Gly870Ser) |                              |
| SETBP1_G870S_FA                   | AGTGAGGAGACGATCCCCAGCGACATCA |
| SETBP1_G870S_RG                   | GAAGTGCTGTTGTTGTCTGTCCAATTCC |
| SETBP1_G870S_OF                   | TATGCCAAATCTCCAGCCCATCAGTGCT |
| SETBP1_G870S_OR                   | GTTGTCCACAATGAGATGCTTTTGCCGG |

1. **Oakley, K. et al. Setbp1 promotes the self-renewal of murine myeloid progenitors via activation of Hoxa9 and Hoxa10. *Blood* 119, 6099-108 (2012).**
